# Supplementary material
Source: publisher figshare collection journal article supplement (https://acs.figshare.com/ndownloader/files/4196695)

**Supporting Information.** Mechanistic Variations in Ionic Hydrogenation of Unsaturated Phosphine and Amine Boranes Timothy S. De Vries,

Supriyo Majumder, Angela M. Sandelin, Guoqiang Wang, and Edwin Vedejs\*

|                                                                                                                                                                                            |      |
|--------------------------------------------------------------------------------------------------------------------------------------------------------------------------------------------|------|
| <b>Hydrogen Evolution from <math>\text{Me}_3\text{N}\cdot\text{BH}_3</math> (37) vs. <math>\text{Bu}_3\text{P}\cdot\text{BH}_3</math> with <math>\text{CF}_3\text{CO}_2\text{H}</math></b> | S-3  |
| <b>Ionic Hydrogenation of Phosphine Borane 4</b>                                                                                                                                           | S-4  |
| <b>Preparation and Ionic Hydrogenation of Phosphine Borane 12</b>                                                                                                                          | S-4  |
| <b>Independent Synthesis of Minor Diastereomer 14a</b>                                                                                                                                     | S-5  |
| <b>General procedure for the synthesis of unsaturated phosphinite-boranes</b>                                                                                                              | S-7  |
| <b>3-Methylenecyclohexyl Diphenylphosphinite borane 18</b>                                                                                                                                 | S-7  |
| <b>Ionic hydrogenation of phosphinite borane 18 using TfOH activation; preparation of 19</b>                                                                                               | S-8  |
| <b>Independent Synthesis of 19 and 20</b>                                                                                                                                                  | S-9  |
| <b>4-Phenylpent-4-en-2-yl Diphenylphosphinite borane 22a</b>                                                                                                                               | S-10 |
| <b>2,2-Dimethyl-5-phenylhex-5-en-3-yl Diphenylphosphinite borane 22b</b>                                                                                                                   | S-10 |
| <b>2,2,5-Trimethylhex-5-en-3-yl Diphenylphosphinite borane 22c</b>                                                                                                                         | S-11 |
| <b>4-Methylpent-4-en-2-yl Diphenylphosphinite borane 22d</b>                                                                                                                               | S-11 |
| <b>General procedure for the ionic hydrogenation of unsaturated acyclic phosphinite-boranes</b>                                                                                            | S-12 |

|                                                                                                |      |
|------------------------------------------------------------------------------------------------|------|
| <b>4-Phenylpent-4-en-2-yl Diphenylphosphinate 24a</b>                                          | S-12 |
| <b>2,2-Dimethyl-5-phenylhex-5-en-3-yl Diphenylphosphinate 24b</b>                              | S-13 |
| <b>2,2,5-Trimethylhex-5-en-3-yl Diphenylphosphinate 24c</b>                                    | S-13 |
| <b>4-Methylpent-4-en-2-yl Diphenylphosphinate 24d</b>                                          | S-14 |
| <b>Preparation of Amine Borane Complexes; 26a, 26b</b>                                         | S-16 |
| <b>Ionic Hydrogenation of Amine Borane 26a; Representative Procedure</b>                       | S-16 |
| <b>Conversion of 26a to 27a Using Stoichiometric MsOH</b>                                      | S-17 |
| <b>4-(Dimethylamino)-2-phenylbutan-2-yl acetate borane complex (30)</b>                        | S-17 |
| <b>Ionic Hydrogenation of 30 Activated by TMSOTf; N,N-Dimethyl-3-phenylbutanamine (33)</b>     | S-17 |
| <b>Footnote 7, Borane Complex <i>i</i></b>                                                     | S-18 |
| <b>Footnote 7, Ionic Hydrogenation Product <i>ii</i></b>                                       | S-18 |
| <b>Reaction of 26b with (+)-Camphorsulfonic Acid</b>                                           | S-19 |
| <b>Preparation of 38 from Me<sub>3</sub>N·BH<sub>3</sub> (37) and (-)-Camphorsulfonic Acid</b> | S-19 |
| <b>References for Supporting Information</b>                                                   | S-20 |
| <b>X-Ray Crystal Structure of 38 and Data Tables</b>                                           | S-21 |
| <b><sup>1</sup>H and <sup>13</sup>C NMR Spectra of Isolable Compounds</b>                      | S-27 |



## Experimental

The following chemicals were commercially available and used as received: trimethylamine borane; tributylphosphine borane; trifluoroacetic acid; methanesulfonic acid; borane tetrahydrofuran, 1.0 M solution in tetrahydrofuran; methyltriphenylphosphonium bromide; sodium bis(trimethylsilyl)amide; 3-methylcyclohexanol (mixture of *cis* and *trans*); *p*-toluenesulfonyl chloride; diphenylphosphine; (+)-camphorsulfonic acid; 3-methyl-2-cyclohexen-1-ol; methanesulfonyl chloride; dimethylamine, 33% in absolute ethanol. Chloroform-*d* and methylene chloride-*d*<sub>2</sub> were dried by storing over activated 4Å molecular sieves; dichloromethane (DCM) and tetrahydrofuran (THF) were dried by passing through a column of activated alumina; triethylamine was distilled from CaH<sub>2</sub> and pyridine from KOH under an N<sub>2</sub> atmosphere. All reactions were performed at room temperature under an N<sub>2</sub> atmosphere unless otherwise stated. Nuclear magnetic resonance experiments were performed on Varian Inova 500 and Inova 400 spectrometers at the following frequencies: <sup>1</sup>H 500 MHz; {<sup>1</sup>H}<sup>13</sup>C 101 MHz; <sup>11</sup>B 160 MHz; <sup>19</sup>F 376 MHz, unless otherwise stated. All spectra were recorded in CDCl<sub>3</sub> and referenced to the <sup>1</sup>H signal of internal Me<sub>4</sub>Si (unless otherwise stated) according to recommendations,<sup>1</sup> using a  $\Xi$  of 25.145020 for Me<sub>4</sub>Si (<sup>13</sup>C), a  $\Xi$  of 32.083974 for BF<sub>3</sub>·OEt<sub>2</sub> (<sup>11</sup>B), and a  $\Xi$  of 94.094011 for CCl<sub>3</sub>F (<sup>19</sup>F).

### Hydrogen Evolution from Me<sub>3</sub>N·BH<sub>3</sub> (37) vs. Bu<sub>3</sub>P·BH<sub>3</sub> with CF<sub>3</sub>CO<sub>2</sub>H

Neat CF<sub>3</sub>CO<sub>2</sub>H (6  $\mu$ L, 78  $\mu$ mol) was added by syringe to a stirred solution of Me<sub>3</sub>N·BH<sub>3</sub> (4.8 mg, 66  $\mu$ mol) in anhydrous CD<sub>2</sub>Cl<sub>2</sub> (1.0 mL) under an N<sub>2</sub> atmosphere. After 45 min, this solution was transferred via syringe to an N<sub>2</sub>-flushed NMR tube. Assay by <sup>1</sup>H NMR showed ca. 45% of Me<sub>3</sub>N·BH<sub>3</sub> remaining by integration of its B–H signal at  $\delta$  2.0–1.3 ppm relative to the methyl singlet at  $\delta$  2.61 ppm (overlapping Me<sub>3</sub>N·BH<sub>3</sub> and Me<sub>3</sub>N·BH<sub>2</sub>(O<sub>2</sub>CCF<sub>3</sub>) signals). The formation of trifluoroacetoxyborane complex was confirmed by reaction of Me<sub>3</sub>N·BH<sub>3</sub> with 10 equiv CF<sub>3</sub>CO<sub>2</sub>H

(50  $\mu$ L, 650  $\mu$ mol) under the same conditions, giving  $\text{Me}_3\text{N}\cdot\text{BH}_2(\text{O}_2\text{CCF}_3)$  as the major product after 1 h:  $^1\text{H}$  NMR:  $\delta$  3.1-2.0 (2H br s), 2.63 (9H, s).

The reaction of  $\text{Bu}_3\text{P}\cdot\text{BH}_3$  (20  $\mu$ L, 75  $\mu$ mol) with  $\text{CF}_3\text{CO}_2\text{H}$  (6  $\mu$ L, 78  $\mu$ mol) in 1.0 mL  $\text{CD}_2\text{Cl}_2$  was performed under the same conditions, assay by  $^1\text{H}$  NMR after 45 min showing less than 2% conversion to  $\text{Bu}_3\text{P}\cdot\text{BH}_2(\text{O}_2\text{CCF}_3)$  by integration of its  $\alpha\text{-CH}_2$  at  $\delta$  1.76-1.67 ppm relative to the  $\alpha\text{-CH}_2$  peak for unreacted  $\text{Bu}_3\text{P}\cdot\text{BH}_3$  at  $\delta$  1.60-1.50 ppm. This product trifluoroacetoxyborane complex was also confirmed by reaction of  $\text{Bu}_3\text{P}\cdot\text{BH}_3$  with 10 equiv  $\text{CF}_3\text{CO}_2\text{H}$  (50  $\mu$ L, 650  $\mu$ mol) under the same conditions, giving  $\text{Bu}_3\text{P}\cdot\text{BH}_2(\text{O}_2\text{CCF}_3)$  as the major product after 1 h:  $^1\text{H}$  NMR:  $\delta$  3.4-2.3 (2H br s), 1.76-1.67 (6H, m), 1.53-1.37 (6H, m), 0.94 (9H, t,  $J = 7.1$  Hz);  $^{31}\text{P}$  NMR:  $\delta$  3.1-0.4 (br m).

#### Representative Procedure for Ionic Hydrogenation of Phosphine Borane **4**

Neat  $\text{MsOH}$  (100  $\mu$ L, 1.54 mmol) was added by syringe to a stirred solution of **4** (138 mg, 0.51 mmol) in anhydrous DCM (5 mL) under an  $\text{N}_2$  atmosphere. After 10 min, this solution was quenched by addition of 10 mL  $\text{MeOH}$ , 1 mL 20% aq.  $\text{NaOH}$  and 1 mL 35% aq.  $\text{H}_2\text{O}_2$ . After an additional 1 h, this mixture was diluted with 10 mL  $\text{H}_2\text{O}$ , separated and the aqueous layer extracted with 2 x 10 mL DCM. The combined organic layers were dried over  $\text{Na}_2\text{SO}_4$  and reduced by rotatory evaporation. The product was purified by flash chromatography (FC) on silica gel (15 cm x 20 mm diameter, 19:1 DCM/ $\text{EtOH}$ ), isolating 110 mg product **5** ( $R_f = 0.3$ , 78% y) and recovering 18 mg **6** ( $R_f = 0.07$ , 12% y).  $^1\text{H}$  and  $^{13}\text{C}$  NMR spectral data matched those reported for **5** and **6**.<sup>2</sup>

#### Preparation and Ionic Hydrogenation of Phosphine Borane **12**

Methyltriphenylphosphonium bromide (520 mg, 1.46 mmol) and sodium bis(trimethylsilyl)-amide (242 mg, 1.32 mmol) were transferred under an N<sub>2</sub> atmosphere to an oven-dried 50 mL round-bottom flask fused to a reflux condenser and dissolved in anhydrous THF (20 mL). After 30 min the now yellow solution was heated to reflux, cooling after 1 h and filtering through an N<sub>2</sub>-flushed fritted filter into a flask containing a stirred solution of 3-diphenylphosphinylcyclohexanone borane<sup>3</sup> (355 mg, 1.20 mmol) in anhydrous THF (10 mL), rinsing the flask in which the phosphonium ylide was formed with 10 mL THF. After 1 d the reaction mixture was washed with H<sub>2</sub>O (50 mL) and brine (50 mL), dried over MgSO<sub>4</sub>, and reduced by rotatory evaporation. The product was purified by FC on silica gel (15 cm x 30 mm diameter, 2:1 hexanes/Et<sub>2</sub>O), isolating 337 mg (3-Methylenecyclohexyl)-diphenylphosphine borane (**12**): analytical thin layer chromatography (TLC) on K6F silica gel 60Å, 2:1 hexanes/Et<sub>2</sub>O, R<sub>f</sub> = 0.53. Molecular ion calculated for C<sub>19</sub>H<sub>24</sub>BNaP: 317.1606; [M+Na], ESMS found *m/z* = 317.1591; IR (neat, cm<sup>-1</sup>) 2381, B–H; 2348, B–H; 1650, C=C; <sup>1</sup>H NMR: δ 7.78-7.70 (4H, m), 7.52-7.41 (6H, m), 4.66 (1H, s), 4.57 (1H, s), 2.55-2.45 (1H, m), 2.31 (1H, br d, J = 13.1 Hz), 2.28-2.17 (2H, m), 2.00 (1H, td, J = 13.4, 4.4 Hz), 1.95-1.87 (1H, m), 1.73-1.66 (1H, m), 1.61 (1H, qt, J = 12.7, 4.4 Hz), 1.35 (1H, qt, J = 13.0, 3.9 Hz), 1.3-0.5 (3H, br m); <sup>13</sup>C NMR: δ 147.4 (d, J = 12 Hz), 132.6 (d, J = 9 Hz), 132.6 (d, J = 8 Hz), 131.2 (d, J = 2 Hz), 131.1 (d, J = 2 Hz), 128.8 (d, J = 10 Hz), 128.8 (d, J = 10 Hz), 128.3 (d, J = 54 Hz), 128.0 (d, J = 53 Hz), 108.6, 35.0 (d, J = 10 Hz), 34.8 (d, J = 27 Hz), 34.4 (d, J = 2 Hz), 27.9 (d, J = 12 Hz), 26.1; <sup>11</sup>B NMR: δ -42.1 (qd, J = 93, 30 Hz); <sup>31</sup>P NMR: δ 19.7-18.0 (br m).

Reaction of **12** under the same conditions as for **4** above gave ionic hydrogenation product **14b** (76% y), and a minor byproduct resulting from hydroboration (14%). *trans*-(3-Methylcyclohexyl)-diphenylphosphine oxide (**14b**): TLC on K6F silica gel 60Å, 19:1 DCM/EtOH, R<sub>f</sub> = 0.18. Molecular ion calculated for C<sub>19</sub>H<sub>23</sub>NaOP: 298.1486; [M<sup>++</sup>], EIMS found *m/z* = 298.1478; IR (neat, cm<sup>-1</sup>) 1181, P=O; <sup>1</sup>H NMR: δ 7.82-7.74 (4H, m), 7.52-7.41 (6H, m), 2.55-2.45 (1H, m), 2.15-2.06 (1H, m), 1.87-1.77 (1H, m), 1.71-1.40 (6H, m), 1.38-1.30 (1H, m), 0.96 (3H, d, J = 7.1 Hz); <sup>13</sup>C NMR: δ 132.6 (d, J = 94 Hz), 132.4 (d, J = 94 Hz), 131.4 (d, J = 3 Hz), 131.4 (d, J = 3 Hz), 131.0 (d, J = 8 Hz), 131.0 (d, J = 8 Hz), 128.6 (d, J

= 11 Hz), 128.5 (d, J = 11 Hz), 31.7, 31.5 (d, J = 73 Hz), 31.0 (d, J = 3 Hz), 27.1 (d, J = 10 Hz), 25.0 (d, J = 3 Hz), 20.8 (d, J = 11 Hz), 18.5;  $^{31}\text{P}$  NMR:  $\delta$  36.4.

### Independent Synthesis of Minor Diastereomer **14a**

Pyridine (5 mL, 62 mmol) was added to *p*-toluenesulfonyl chloride (1.63 g, 8.5 mmol) at 0 °C under an N<sub>2</sub> atmosphere to dissolve; the solution developed a yellow color. To this was added the commercially available mixture of *cis*- and *trans*-3-methylcyclohexanol (**15**), the yellow color fading on alcohol addition. After 20 h at 0 °C, the reaction was quenched by pouring onto 150 mL iced 1 M aq. HCl, extracting with ethyl ether (3 x 20 mL), drying the combined organic layers over MgSO<sub>4</sub> before reducing by rotatory evaporation, leaving 1.74 g (88% y) of residue.  $^1\text{H}$  NMR assay shows a mixture of *cis*- and *trans*-3-methylcyclohexyl-*p*-toluenesulfonates (**16**) in a ratio of 2.6:1 by integration of the methyl doublets at 0.89 and 0.82 ppm, respectively. This crude tosylate mixture was taken on without purification.

Diphenylphosphine (0.62 g, 3.3 mmol) was charged to a 50 mL round-bottom flask under an N<sub>2</sub> atmosphere and dissolved in anhydrous THF (17 mL). After cooling the solution to -40 °C, a solution of *n*BuLi (1.98 M in hexane, 1.7 mL, 3.4 mmol) was added slowly, the resulting solution developing a deep red color. After stirring 4 h, the solution was warmed to 0 °C and a mixture of *cis*- and *trans*-3-methylcyclohexyl-*p*-toluenesulfonate (**16**, 0.96 g, 3.6 mmol) was added by syringe. After 2 h the deep red color had mostly faded to a light orange, and the mixture was oxidized by the addition of 5 mL 35% aq. H<sub>2</sub>O<sub>2</sub>. After warming to rt, the layers were separated and the aqueous layer washed with ethyl ether (2 x 20 mL), the combined organic layers dried over MgSO<sub>4</sub> and reduced by rotatory evaporation. Assay of the crude product mixture (1.14 g) by  $^1\text{H}$  NMR showed unreacted tosylate **16** further enriched in the *cis*-isomer as well as the desired *cis*-diastereomer (**14a**); no trace of *trans*-(3-methylcyclohexyl)-diphenylphosphine oxide (**14b**) was observed. Purification of a portion of the crude product (176 mg) by preparative thin layer

chromatography (PLC) on silica gel (20 x 20 cm x 1000  $\mu$ m, EtOAc) gave pure *cis*-(3-methylcyclohexyl)-diphenylphosphine oxide (**14a**, 23 mg, 50% based on *trans*-3-methylcyclohexyl-*p*-toluenesulfonate): TLC on K6F silica gel 60 $\text{\AA}$ , EtOAc,  $R_f$  = 0.42. Molecular ion calculated for  $\text{C}_{19}\text{H}_{23}\text{NaOP}$ : 298.1486;  $[\text{M}^{+}]$ , EIMS found  $m/z$  = 298.1490; IR (neat,  $\text{cm}^{-1}$ ) 1181, P=O;  $^1\text{H}$  NMR:  $\delta$  7.82-7.74 (4H, m), 7.54-7.43 (6H, m), 2.33-2.24 (1H, m), 1.86-1.79 (1H, m), 1.74-1.65 (3H, m), 1.54-1.17 (4H, m), 0.92 (1H, qd,  $J$  = 12.6, 3.7 Hz), 0.86 (3H, d,  $J$  = 6.6 Hz);  $^{13}\text{C}$  NMR:  $\delta$  132.2 (d,  $J$  = 94 Hz), 132.1 (d,  $J$  = 94 Hz), 131.4 (d,  $J$  = 3 Hz), 131.4 (d,  $J$  = 3 Hz), 131.1 (d,  $J$  = 9 Hz), 128.6 (d,  $J$  = 11 Hz), 128.5 (d,  $J$  = 12 Hz), 37.1 (d,  $J$  = 73 Hz), 36.6, 32.9 (d,  $J$  = 13 Hz), 32.7 (d,  $J$  = 3 Hz), 26.3 (d,  $J$  = 14 Hz), 24.3 (d,  $J$  = 3 Hz), 22.7;  $^{31}\text{P}$  NMR:  $\delta$  34.1.

**General Procedure for the Synthesis of Unsaturated Phosphinite Boranes:** To a solution of homoallylic alcohol in ether at 0  $^{\circ}\text{C}$  was added  $\text{Et}_3\text{N}$  followed by the dropwise addition of chlorodiphenyl phosphine. The resulting mixture was warmed to room temperature and stirred for 1 h. The progress of the reaction was monitored by TLC and upon completion the solution was filtered through a plug of silica and concentrated. 20% EtOAc in hexanes was added to the concentrate and filtered once again to remove the remaining ammonium salts. The filtrate was concentrated under reduced pressure and dried under vacuum. The crude material was dissolved in THF and cooled to 0  $^{\circ}\text{C}$ .  $\text{THF}\cdot\text{BH}_3$  (1M solution in THF) was added dropwise and the resulting solution was slowly warmed to room temperature and stirred overnight. The solution was concentrated under reduced pressure and the crude material was purified by column chromatography on silica.

**3-Methylenecyclohexyl Diphenylphosphinite Borane 18.** The general procedure was followed from 3-methylenecyclohexanol (672 mg, 6 mmol),  $\text{Et}_3\text{N}$  (1.7 mL, 12 mmol), chlorodiphenyl phosphine (1.72 mL, 9.6 mmol) and  $\text{THF}\cdot\text{BH}_3$  (4.7 mL, 4.7 mmol). The crude product was purified by column chromatography using 1:19 EtOAc/hexanes to yield **18** (1.0 g, 68%) as colorless oil which slowly crystalized to a white solid, mp 49-50  $^{\circ}\text{C}$ . Molecular ion calculated for  $\text{C}_{19}\text{H}_{24}\text{BOP}$ : 309.1574;  $[\text{M}-\text{H}]$ , ESMS found  $m/z$  = 309.1573; IR (neat,  $\text{cm}^{-1}$ ) 2384, B-H; 2344, B-H;



1653, C=C;  $^1\text{H}$  NMR:  $\delta$  7.80-7.74 (4H, m), 7.52-7.48 (2H, m), 7.46-7.42 (4H, m), 4.73 (1H, s), 4.64 (1H, s), 4.51-4.44 (1H, m), 2.52 (1H, dd,  $J$  = 13.0 and 4 Hz), 2.28 (1H, dd,  $J$  = 13.5 and 8.0 Hz), 2.17-2.12 (1H, m), 2.07-2.02 (1H, m), 1.94-1.90 (1H, m), 1.83-1.76 (1H, m), 1.70-1.62 (1H, m), 1.44-1.36 (1H, m), 1.28-0.72 (3H, br m);  $^{13}\text{C}$  NMR:  $\delta$  144.7, 133.3 (d,  $J$  = 64.8 Hz), 133.2 (d,  $J$  = 64.4 Hz), 131.5, 131.2 (d,  $J$  = 7.1 Hz), 131.1 (d,  $J$  = 7.1 Hz), 128.5 (d,  $J$  = 1.9 Hz), 128.4 (d,  $J$  = 1.9 Hz), 77.0 (d,  $J$  = 2.4 Hz), 42.4 (d,  $J$  = 3.4 Hz), 33.9, 33.1 (d,  $J$  = 3.4 Hz), 23.5;  $^{11}\text{B}$  NMR:  $\delta$  -38.6 to -41.3 (m);  $^{31}\text{P}$  NMR:  $\delta$  102.1-101.9 (br m).

**Ionic hydrogenation of phosphinate **19** using TfOH activation.** To a solution of phosphinite borane **18** (62 mg, 0.2 mmol) at  $-78\text{ }^\circ\text{C}$  in  $\text{CH}_2\text{Cl}_2$  (5 mL) was added  $\text{CF}_3\text{SO}_3\text{H}$  (18  $\mu\text{L}$ , 0.2 mmol) dropwise under nitrogen. The solution was stirred at that temperature for 4 h. Then the solution was treated with a premixed solution of  $\text{H}_2\text{O}_2$  (0.5 mL) and 20% NaOH (0.5 mL) in methanol 4 mL) and stirred for further 4h. The reaction mixture was extracted with  $\text{CH}_2\text{Cl}_2$  (3x), dried over  $\text{MgSO}_4$ , filtered and concentrated. NMR analysis of the crude sample showed diastereoselectivity of 19:1 according to a comparison of methyl signals vs. independently synthesized diastereomers. The crude product was purified by PLC using 40% EtOAc in hexanes to yield **19** (27 mg, 43%) as a pure diastereomer, mp  $80\text{-}81\text{ }^\circ\text{C}$ . Molecular ion calcd for  $\text{C}_{19}\text{H}_{23}\text{O}_2\text{P}$ : 315.1508;  $[\text{M}+\text{H}]$ , ESMS found  $m/z$  = 315.1505; IR (neat,  $\text{cm}^{-1}$ ) 1221, P=O;  $^1\text{H}$  NMR:  $\delta$  7.84-7.80 (4H, m), 7.52-7.49 (2H, m), 7.46-7.42 (4H, m), 4.76-4.74 (1H, m), 1.94-1.86 (3H, m), 1.82-1.76 (1H, m), 1.75-1.69 (1H, m), 1.59-1.54 (1H, m), 1.43-1.37 (1H, m), 1.14 (1H, t,  $J$  = 7.5 Hz), 0.98-0.88 (1H, m), 0.86 (3H, d,  $J$  = 6.5 Hz);  $^{13}\text{C}$  NMR (175 MHz):  $\delta$  132.5 (interpreted as two carbon signals, d,  $J$  = 136.8 Hz), 131.8 (interpreted as two overlapping carbon signals, d,  $J$  = 2.6 Hz), 131.6 (d,  $J$  = 10.1 Hz), 131.5 (d,  $J$  = 10.1 Hz), 128.3 (interpreted as two overlapping carbon signals, d,  $J$  = 12.9 Hz), 72.7 (d,  $J$  = 5.4 Hz), 40.4 (d,  $J$  = 3.0 Hz), 34.1, 31.8 (d,  $J$  = 4.0 Hz), 26.6, 22.1, 20.3;  $^{31}\text{P}$  NMR:  $\delta$  29.4 (s).

## Independent Synthesis of **19** and **20**

Both the major and the minor diastereomers (**19** and **20**) were independently synthesized by the oxidation of the phosphonite borane of *trans* and *cis* 3-methylcyclohexanol. To a solution of *Cis*-3-methylcyclohexanol (1 equiv, commercially available as a pure diastereomer) or *trans*-3-methylcyclohexanol (1 equiv, 80:20 mixture of *trans*:*cis*) at 0 °C in diethyl ether was added Et<sub>3</sub>N (2 equiv) followed by the dropwise addition of chlorodiphenyl phosphine (1.5 equiv). The resulting mixture was warmed to room temperature and stirred for 1 h. The progress of the reaction was monitored by TLC and upon completion the solution was filtered through a plug of silica and concentrated. 20% EtOAc in hexanes was added to the concentrate and filtered once again to remove the remaining ammonium salts. The filtrate was concentrated under reduced pressure and dried under vacuum. The crude material was dissolved in THF and cooled to 0 °C. THF·BH<sub>3</sub> (1 equiv, 1M solution in THF) was added dropwise and the resulting solution was slowly warmed to room temperature and stirred overnight. The solution was concentrated under reduced pressure and the crude material was purified by flash column chromatography on silica using 5% acetone in hexanes. **Oxidation procedure:** The phosphinite borane (1 equiv) was dissolved in dry dichloromethane and was treated with 0.5 equiv I<sub>2</sub>. The solution was stirred under N<sub>2</sub> until the iodine color vanishes and then was poured in a premixed solution of H<sub>2</sub>O<sub>2</sub> and NaOH. The solution was stirred at room temperature for 4h. Usual work-up followed by PLC using 30-40% EtOAc in hexanes produced pure samples of both *trans* (**19**) and *cis* (**20**) diastereomer. **Phosphinate 20:** R<sub>f</sub>: 0.34 in 30% EtOAc hexanes. Molecular ion calcd for C<sub>19</sub>H<sub>23</sub>O<sub>2</sub>P: 315.1508; [M+H], ESMS found *m/z* = 315.1504; IR (neat, cm<sup>-1</sup>) 1229, P=O; <sup>1</sup>H NMR: δ 7.81-7.76 (4H, m), 7.49-7.45 (2H, m), 7.42-7.38 (4H, m), 4.34-4.26 (1H, m), 2.07-2.00 (2H, m), 1.70-1.66 (1H, m), 1.54-1.51 (1H, m), 1.42-1.33 (2H, m), 1.23-1.14 (2H, m), 0.85 (3H, d, J = 6.5 Hz), 0.81-0.73 (1H, m); <sup>13</sup>C NMR (175 MHz): δ 132.57 (d, J = 136.8 Hz), 132.53 (d, J = 136.3 Hz), 131.8 (interpreted as two overlapping carbon signals, d, J = 2.6 Hz), 131.6 (d, J = 10.1 Hz), 131.5 (d, J = 10.1 Hz), 128.3 (interpreted as two

overlapping carbon signals, d,  $J = 12.9$  Hz), 75.6 (d,  $J = 6.8$  Hz), 42.9 (d,  $J = 4.2$  Hz), 33.9 (d,  $J = 4.2$  Hz), 33.6, 31.3, 23.9, 22.1;  $^{31}\text{P}$  NMR:  $\delta$  29.8 (s).

**Phosphinite borane 22a.** The general procedure was followed from 4-phenylpent-4-en-2-ol (972 mg, 6 mmol),  $\text{Et}_3\text{N}$  (1.4 mL, 10 mmol), chlorodiphenyl phosphine (1.62 mL, 9 mmol) and  $\text{THF}\cdot\text{BH}_3$  (4 mL, 4 mmol). The crude product was purified by column chromatography using 1:19 acetone/hexanes to yield **22a** (900 mg, 63%) as colorless oil. Molecular ion calcd for  $\text{C}_{23}\text{H}_{23}\text{OP}$ : 346.1487;  $[\text{M}-\text{BH}_3]$ , ESMS found  $m/z = 346.1478$ ; IR (neat,  $\text{cm}^{-1}$ ) 2384, B–H; 2344, B–H; 1626, C=C;  $^1\text{H}$  NMR:  $\delta$  7.75–7.69 (4H, m), 7.52–7.42 (6H, m), 7.31–7.27 (4H, m), 5.33 (1H, d,  $J = 1.5$  Hz), 5.14 (1H, d,  $J = 1.0$  Hz), 4.65–4.60 (1H, m), 3.08 (1H, dd,  $J = 14.0$  and 6.0 Hz), 2.70 (1H, dd,  $J = 14.0$  and 7.5 Hz), 1.25 (3H, d,  $J = 6$  Hz), 1.2–0.70 (3H, br m);  $^{13}\text{C}$  NMR:  $\delta$  144.2, 140.1, 133.1 (d,  $J = 63.9$  Hz), 132.9 (d,  $J = 65.4$  Hz), 131.5 (interpreted as two overlapping carbon signals, d,  $J = 2.9$  Hz), 131.3 (d,  $J = 10.8$  Hz), 131.1 (d,  $J = 11$  Hz), 128.4 (d,  $J = 10.5$  Hz), 128.3 (d,  $J = 11.5$ ), 128.3, 127.5, 126.1, 115.6, 74.5 (d,  $J = 1.8$  Hz), 43.8 (d,  $J = 4.4$  Hz), 21.6 (d,  $J = 2.9$  Hz);  $^{11}\text{B}$  NMR:  $\delta$  -39.9 to -40.0 (m);  $^{31}\text{P}$  NMR:  $\delta$  102–101.5 (br m).

**Phosphinite borane 22b.** This compound was prepared following a similar procedure to that of phosphinite borane **22c**. The reaction was carried out with 2,2-dimethyl-5-phenylhex-5-en-3-ol (612 mg, 3 mmol),  $n\text{-BuLi}$  (2.4 mL, 3.84 mmol), chlorodiphenyl phosphine (0.72 mL, 4 mmol) and  $\text{THF}\cdot\text{BH}_3$  (2.7 mL, 2.7 mmol). The crude product was purified by column chromatography using 1:19 acetone/hexanes to yield **22b** (864 mg, 79%) as colorless oil. Molecular ion calculated for  $\text{C}_{26}\text{H}_{32}\text{BOP}$ : 401.2200;  $[\text{M}-\text{H}]$ , ESMS found  $m/z = 401.2198$ ; IR (neat,  $\text{cm}^{-1}$ ) 2386, B–H; 2347, B–H; 1627, C=C;  $^1\text{H}$  NMR:  $\delta$  7.80–7.74 (4H, m), 7.47–7.36 (6H, m), 7.30–7.26 (3H, m), 7.17–7.16 (2H, m), 4.96 (1H, s), 4.87 (1H, d,  $J = 1.0$  Hz), 4.42–4.46 (1H, m), 2.98 (1H, dd,  $J = 15.0$  and 4 Hz), 2.69 (1H, dd,  $J = 15.5$  and 7.5 Hz), 0.93 (9H, s), 1.28–0.75 (3H, br m);  $^{13}\text{C}$  NMR:  $\delta$  144.1, 140.3, 134.3 (d,  $J = 82.9$  Hz), 133.9 (d,  $J = 87.3$  Hz), 131.3 (d,  $J = 11.0$  Hz), 131.1 (d,  $J = 2.4$  Hz), 130.8 (d,  $J = 10.4$  Hz), 128.5 (d,  $J =$

10.5 Hz), 128.3 (d,  $J = 11.0$  Hz), 128.1, 128.0 (d,  $J = 11.9$  Hz), 127.4, 126.4, 115.8, 86.7 (d,  $J = 4.2$  Hz), 38.0 (d,  $J = 2.0$  Hz), 36.2 (d,  $J = 3.4$  Hz), 26.4;  $^{11}\text{B}$  NMR:  $\delta$  -40.8 (br s);  $^{31}\text{P}$  NMR:  $\delta$  102.2-101.8 (br m).

**Phosphinite borane 22c:** To a solution of 2,2,5-trimethylhex-5-en-3-ol (650 mg, 4.57 mmol) in THF (30 mL) at 0 °C was added *n*-BuLi (3.57 mL, 5.7 mmol) dropwise. The resulting dark red solution was stirred at that temperature for 1 h and then chlorodiphenyl phosphine (1.02 mL, 5.7 mmol) was added keeping the temperature at 0 °C. The solution was slowly warmed to room temperature and stirred for 2 h. The resulting light yellow solution was filtered and concentrated under reduced pressure. The crude material was dissolved in THF (25 mL) and cooled to 0 °C. THF·BH<sub>3</sub> (4.3 mL, 4.3 mmol) was added dropwise and the resulting solution was slowly warmed to room temperature and stirred overnight. The solution was concentrated under reduced pressure and the crude product was purified by column chromatography using 1:19 acetone/hexanes to yield **22c** (670 mg, 46%) as colorless oil. Molecular ion calculated for C<sub>21</sub>H<sub>27</sub>OP: 326.1800; [M-BH<sub>3</sub>], ESMS found  $m/z = 326.1798$ ; IR (neat, cm<sup>-1</sup>) 2386, B-H; 2347, B-H; 1651, C=C;  $^1\text{H}$  NMR:  $\delta$  7.82-7.74 (4H, m), 7.48-7.36 (6H, m), 4.47-4.52 (1H, m), 4.41 (2H, d,  $J = 0.5$  Hz), 2.37 (1H, dd,  $J = 14.5$  and 3.5 Hz), 2.25 (1H, dd,  $J = 15.0$  and 7.5 Hz), 1.67 (3H, s), 0.94 (9H, s), 1.47-0.97 (3H, br m);  $^{13}\text{C}$  NMR:  $\delta$  141.4, 134.5 (d,  $J = 85$  Hz), 133.8 (d,  $J = 89$  Hz), 131.3 (d,  $J = 11.5$  Hz), 131.2 (d,  $J = 2.4$  Hz), 131.1 (d,  $J = 2.5$  Hz), 130.9 (d,  $J = 11$  Hz), 128.3 (d,  $J = 10.5$  Hz), 128.1 (d,  $J = 10.5$  Hz), 113.7, 86.3 (d,  $J = 4.2$  Hz), 40.9 (d,  $J = 1.9$  Hz), 36.1 (d,  $J = 3.9$  Hz), 26.2, 22.2;  $^{11}\text{B}$  NMR:  $\delta$  -39.3 to -40.0 (m);  $^{31}\text{P}$  NMR:  $\delta$  102.1-101.6 (br m).

**Phosphinite borane 22d:** The general procedure was followed from 4-methylpent-4-en-2-ol (1 g, 10 mmol), Et<sub>3</sub>N (2.1 mL, 15 mmol), chlorodiphenyl phosphine (2.16 mL, 12 mmol) and THF·BH<sub>3</sub> (7 mL, 7 mmol). The crude product was purified by column chromatography using 1:9 EtOAc/hexanes to yield **22d** (790 mg, 38%) as colorless oil. Molecular ion calculated for C<sub>18</sub>H<sub>23</sub>BOP: 297.1580; [M-H], ESMS found  $m/z = 297.1585$ ; IR (neat, cm<sup>-1</sup>) 2384, B-H; 2344, B-H; 1650, C=C;  $^1\text{H}$  NMR:  $\delta$  7.77-7.69 (4H, m), 7.52-7.40 (6H, m), 4.76 (1H, s), 4.74 (1H, s), 4.73-

4.69 (1H, m), 2.48 (1H, dd, J = 14.0 and 6.5 Hz), 2.22 (1H, dd, J = 13.5 and 7.0 Hz), 1.67 (3H, s), 1.26 (3H, d, J = 6.5 Hz), 1.42-0.88 (3H, br m);  $^{13}\text{C}$  NMR:  $\delta$  141.5, 133.5 (d, J = 63.9 Hz), 133.1 (d, J = 66.8 Hz), 131.5 (d, J = 7.6 Hz), 131.4 (d, J = 7.6 Hz), 131.3 (d, J = 1.9 Hz), 131.2 (d, J = 1.5 Hz), 128.4 (d, J = 14.2 Hz), 128.3 (d, J = 14.8 Hz), 113.7, 74.3 (d, J = 2.4 Hz), 46.6 (d, J = 4.8 Hz), 22.4, 21.8 (d, J = 2.4 Hz);  $^{11}\text{B}$  NMR:  $\delta$  -39.4 to -40.6 (m);  $^{31}\text{P}$  NMR:  $\delta$  101.9-101.0 (br m).

**General Procedure for the Ionic Hydrogenation of Unsaturated Acyclic Phosphinite Boranes.** To a solution of phosphinite borane in  $\text{CH}_2\text{Cl}_2$  (ca. 0.1 M) was added  $\text{MeSO}_3\text{H}$  (3 equiv) at room temperature under nitrogen. The solution was stirred at that temperature for 15-60 min until TLC assay indicated completion, and the solution was then treated with a premixed solution of  $\text{H}_2\text{O}_2$  and 20%NaOH in methanol and stirred for an additional 4h. The reaction mixture was extracted with  $\text{CH}_2\text{Cl}_2$  (3x), dried over  $\text{MgSO}_4$ , filtered and concentrated. The crude product was purified either by column chromatography or by PLC.

**Phosphinate 24a:** The general procedure was followed from phosphinite borane **22a** (144 mg, 0.4 mmol) and  $\text{MeSO}_3\text{H}$  (80  $\mu\text{L}$ , 1.2 mmol) in 4 mL  $\text{CH}_2\text{Cl}_2$ . The solution was oxidized with a premixed solution of 30%  $\text{H}_2\text{O}_2$  (1 mL) and 20% NaOH (1 mL) in methanol (8 mL). The crude product was purified by column chromatography using 40% EtOAc in hexanes to yield **24a** (112 mg, 77%) as a mixture of two diastereomers (dr ~ 2.6:1). Molecular ion calcd for  $\text{C}_{23}\text{H}_{25}\text{O}_2\text{P}$ : 365.1665;  $[\text{M}+\text{H}]$ , ESMS found  $m/z$  = 365.1655; IR (neat,  $\text{cm}^{-1}$ ) 1230,  $\text{P}=\text{O}$ ; Major diastereomer (signals based on a mixture of two inseparable diastereomers):  $^1\text{H}$  NMR:  $\delta$  7.81-7.73 (4H, m), 7.52-7.38 (6H, m), 7.25-7.00 (5H, m), 4.43-4.37 (1H, m), 2.79-2.74 (1H, m), 2.15-2.09 (1H, m), 1.79-1.74 (1H, m), 1.31 (3H, d, J = 6.5 Hz), 1.15 (3H, d, J = 7 Hz);  $^{13}\text{C}$  NMR: 146.2, 132.3 (d, J = 132.0 Hz), 132.2 (d, J = 109.2 Hz), 131.8 (d, J = 2.5 Hz), 131.6 (d, J = 10.0 Hz), 131.5 (d, J = 10.0 Hz), 128.4 (d, J = 4.3 Hz), 128.3 (d, J = 1.9 Hz), 128.2 (d, J = 3.4 Hz), 126.9, 126.5, 125.9, 71.7 (d, J = 6.1 Hz), 45.8 (d, J = 5.3 Hz), 36.0, 22.5, 22.1 (d, J = 2.4 Hz);  $^{31}\text{P}$  NMR:  $\delta$  29.3 (s).

**Phosphinate 24b:** The general procedure was followed from phosphinite borane **22b** (80.4 mg, 0.2 mmol) and MeSO<sub>3</sub>H (40 µL, 0.6 mmol) in 2 mL CH<sub>2</sub>Cl<sub>2</sub>. The solution was oxidized with a premixed solution of 30% H<sub>2</sub>O<sub>2</sub> (0.5 mL) and 20% NaOH (0.5 mL) in methanol (4 mL). The crude product was purified by column chromatography using 30% EtOAc in hexanes to yield **24b** (49 mg, 60%) as a mixture of two diastereomers (dr ~ 1:0.85). Two diastereomers were separated by repeated PLC using 30% EtOAc in hexanes. Major diastereomer: Molecular ion calcd for C<sub>26</sub>H<sub>31</sub>O<sub>2</sub>P: 407.2134; [M+H], ESMS found  $m/z$  = 407.2136; IR (neat, cm<sup>-1</sup>) 1229, P=O; <sup>1</sup>H NMR (700 MHz): δ 7.91-7.88 (2H, m), 7.76-7.73 (2H, m), 7.51-7.49 (1H, m), 7.47-7.43 (3H, m), 7.39-7.36 (2H, m), 7.22 (2H, t, J = 7.7 Hz), 7.11 (1H, t, J = 7.7 Hz), 7.08 (2H, d, J = 7.0 Hz), 4.00-3.98 (1H, m), 2.76-2.73 (1H, m), 1.92-1.88 (1H, m), 1.83-1.79 (1H, m), 0.97 (3H, d, J = 7.0 Hz), 0.71 (9H, s); <sup>13</sup>C NMR (175 MHz): δ 146.1, 134.0 (d, J = 134.7 Hz), 133.2 (d, J = 133.3 Hz), 131.7 (d, J = 2.8 Hz), 131.6 (d, J = 10.1 Hz), 131.5 (d, J = 2.6 Hz), 131.3 (d, J = 10.1 Hz), 128.4 (d, J = 12.7 Hz), 128.3 (d, J = 12.9 Hz), 128.2, 127.6, 125.9, 84.0 (d, J = 8.0 Hz), 40.7 (d, J = 1.4 Hz), 36.6, 35.3 (d, J = 4.7 Hz), 25.8 (3C), 23.1; <sup>31</sup>P NMR: δ 28.5 (s). Minor diastereomer: mp 101-102 °C. Molecular ion calcd for C<sub>26</sub>H<sub>31</sub>O<sub>2</sub>P: 407.2134; [M+H], ESMS found  $m/z$  = 407.2136; IR (neat, cm<sup>-1</sup>) 1228, P=O; <sup>1</sup>H NMR (700 MHz): δ 7.87-7.84 (2H, m), 7.81-7.78 (2H, m), 7.50 (1H, t, J = 7.0 Hz), 7.47-7.39 (5H, m), 7.16 (2H, t, J = 7.0 Hz), 7.11 (1H, t, J = 7.0 Hz), 6.77 (2H, d, J = 7.7 Hz), 4.51 (1H, t, J = 9.0 Hz), 2.51-2.48 (1H, m), 1.89-1.85 (1H, m), 1.73 (1H, t, J = 13.3 Hz), 1.13 (3H, d, J = 7.0 Hz), 0.90 (9H, s); <sup>13</sup>C NMR (175 MHz): δ 148.1, 134.2 (d, J = 136.9 Hz), 133.4 (d, J = 137.4 Hz), 131.7 (d, J = 2.8 Hz), 131.6 (d, J = 2.8 Hz), 131.4 (d, J = 9.6 Hz), 131.3 (d, J = 9.5 Hz), 128.4 (d, J = 12.9 Hz), 128.3 (d, J = 12.9 Hz), 128.2, 126.5, 125.7, 84.4 (d, J = 8.0 Hz), 40.5 (d, J = 2.1 Hz), 35.4 (d, J = 4.2 Hz), 35.3, 26.3 (3C), 20.1; <sup>31</sup>P NMR: δ 29.5 (s).

**Phosphinate 24c:** The general procedure was followed from phosphinite borane **22c** (68 mg, 0.2 mmol) and MeSO<sub>3</sub>H (40 µL, 0.6 mmol) in 2 mL CH<sub>2</sub>Cl<sub>2</sub>. The solution was oxidized with a premixed solution of 30% H<sub>2</sub>O<sub>2</sub> (0.5 mL) and 20% NaOH (0.5 mL) in methanol (4 mL). The crude

product was purified by column chromatography using 30% EtOAc in hexanes to yield **24c** (42 mg, 61%) as a white solid, mp 94-95 °C. Molecular ion calculated for  $C_{21}H_{29}O_2P$ : 345.1978; [M+H], ESMS found  $m/z$  = 345.1972; IR (neat,  $cm^{-1}$ ) 1222, P=O;  $^1H$  NMR:  $\delta$  7.83-7.78 (4H, m), 7.48-7.39 (6H, m), 4.37-4.33 (1H, m), 1.62-1.56 (1H, m), 1.45-1.37 (1H, m), 1.33-1.26 (1H, m), 0.90 (9H, s), 0.75 (3H, d,  $J$  = 6.5 Hz), 0.65 (3H, d,  $J$  = 6.5 Hz);  $^{13}C$  NMR:  $\delta$  134.0 (d,  $J$  = 136.4 Hz), 133.5 (d,  $J$  = 137.9 Hz), 131.5 (d,  $J$  = 2.9 Hz), 131.4 (d,  $J$  = 2.9 Hz), 131.3 (d,  $J$  = 10.0 Hz), 131.2 (d,  $J$  = 10.0 Hz), 128.2 (d,  $J$  = 6.8 Hz), 128.1 (d,  $J$  = 6.8 Hz), 83.8 (d,  $J$  = 8.1 Hz), 40.9 (d,  $J$  = 2.4 Hz), 35.3 (d,  $J$  = 3.8 Hz), 26.2 (3C), 24.7, 23.6, 21.3;  $^{31}P$  NMR:  $\delta$  28.9 (s).

**Phosphinate 24d and Phosphinite borane 25:** The general procedure was followed from phosphinite borane **22d** (298 mg, 1 mmol) and  $MeSO_3H$  (200  $\mu L$ , 3 mmol) in 10 mL  $CH_2Cl_2$ . The solution was oxidized with a premixed solution of 30%  $H_2O_2$  (2.5 mL) and 20% NaOH (2.5 mL) in methanol (20 mL). The crude product was chromatographed on silica gel using 40% EtOAc in hexanes. The nonpolar fractions were collected and saved for further isolation of pure phosphinite borane **25**. The more polar fractions provided pure **24d** (195 mg, 65%) as viscous oil. Molecular ion calcd for  $C_{18}H_{23}O_2P$ : 303.1508; [M+H], ESMS found  $m/z$  = 303.1509; IR (neat,  $cm^{-1}$ ) 1230, P=O;  $^1H$  NMR:  $\delta$  7.85-7.83 (4H, m), 7.52-7.48 (2H, m), 7.46-7.41 (4H, m), 4.63-4.56 (1H, m), 1.73-1.62 (2H, m), 1.39-1.33 (1H, m), 1.31 (3H, d,  $J$  = 6 Hz), 0.81 (6H, app. t,  $J$  = 6.5 Hz);  $^{13}C$  NMR:  $\delta$  132.7 (d,  $J$  = 136.9 Hz), 132.3 (d,  $J$  = 132.5 Hz), 131.8 (d,  $J$  = 2.4 Hz), 131.6 (d,  $J$  = 10.0 Hz), 131.5 (d,  $J$  = 10.0 Hz), 128.3 (d,  $J$  = 12.9 Hz), 128.2 (d,  $J$  = 12.9 Hz), 72.1 (d,  $J$  = 6.8 Hz), 47.2 (d,  $J$  = 5.8 Hz), 24.4, 22.7, 22.6 (d,  $J$  = 2.4 Hz), 22.3;  $^{31}P$  NMR:  $\delta$  29.3 (s). The upper nonpolar fractions were concentrated and purified twice by PLC. In the second PLC using 2%  $Et_2O$  in hexanes, the upper nonpolar band was roughly divided into two halves. Extraction of the upper half provided the pure phosphinite borane **25**. Molecular ion calculated for  $C_{18}H_{23}OP$ : 286.1486; [M-BH<sub>3</sub>], EIMS found  $m/z$  = 286.1483; IR (neat,  $cm^{-1}$ ) 2383, B-H; 2345, B-H;  $^1H$  NMR:  $\delta$  7.75-7.64 (4H, m), 7.49-7.37 (6H, m), 4.65-4.55 (1H, m), 1.66-1.54 (2H, m), 1.32-1.27 (1H, m), 1.20 (3H, d,  $J$  = 6.0 Hz), 0.81 (3H, d,  $J$  = 6.4 Hz), 0.81 (3H, d,  $J$  = 6.4 Hz);  $^{13}C$  NMR:  $\delta$  133.5 (d,  $J$  = 63.7

Hz), 133.3 (d,  $J = 67.0$  Hz), 131.5 (2C), 131.2 (d,  $J = 12.9$  Hz), 131.1 (d,  $J = 12.9$  Hz), 128.4 (d,  $J = 10.1$  Hz), 128.3 (d,  $J = 10.8$  Hz), 74.9 (d,  $J = 2.1$  Hz), 47.3 (d,  $J = 5.4$  Hz), 24.5, 22.8, 22.5 (d,  $J = 2.1$  Hz), 22.3;  $^{11}\text{B}$  NMR:  $\delta$  -38.6 to -41.4 (m);  $^{31}\text{P}$  NMR:  $\delta$  101.6-100.4 (br m).

### Preparation of Amine Borane Complexes; **26a** and **26b**

$\text{BH}_3\cdot\text{THF}$  (6.3 mL, 6.3 mmol) was added by syringe under an  $\text{N}_2$  atmosphere to the known (3-methyl-3-butenyl)-dimethylamine<sup>4</sup> (1.0 mL, 6.8 mmol) in anhydrous DCM (20 mL). After 1 h, the solution was filtered through a plug of silica gel, flushing with DCM and removing solvent by rotary evaporation, yielding 0.78 g (3-methyl-3-butenyl)-dimethylamine borane **26a** (97% y): TLC on K6F silica gel 60Å, 9:1 hexanes/ $\text{Et}_2\text{O}$ ,  $R_f = 0.26$ . Molecular ion calculated for  $\text{C}_7\text{H}_{17}\text{BN}$ : 126.1454;  $[\text{M}-\text{H}]$ , EIMS found  $m/z = 126.1452$ ; IR (neat,  $\text{cm}^{-1}$ ) 2366, B–H; 2319, B–H; 2273, B–H; 1650, C=C; 1459, B–N; 1167, C–N;  $^1\text{H}$  NMR:  $\delta$  4.81 (1H, s), 4.73 (1H, s), 2.90-2.85 (2H, m), 2.61 (6H, s), 2.46-2.41 (2H, m), 2.1-1.3 (3H, br m), 1.77 (3H, s);  $^{13}\text{C}$  NMR:  $\delta$  141.9, 112.1, 63.0, 51.4, 32.1, 22.7;  $^{11}\text{B}$  NMR:  $\delta$  -9.9 (q,  $J = 98$  Hz).

Borane complexation from (3-phenyl-3-butenyl)-dimethylamine<sup>5</sup> under the same conditions gave **26b** (67%): TLC on K6F silica gel 60Å, 2:1 hexanes/ $\text{EtOAc}$ ,  $R_f = 0.27$ . Molecular ion calculated for  $\text{C}_{12}\text{H}_{20}\text{BNNa}$ : 212.1586;  $[\text{M}+\text{Na}]$ , ESMS found  $m/z = 212.1582$ ; IR (neat,  $\text{cm}^{-1}$ ) 2366, B–H; 2319, B–H; 2273, B–H; 1627, C=C; 1461, B–N; 1167, C–N;  $^1\text{H}$  NMR:  $\delta$  7.44-7.41 (2H, m), 7.37-7.33 (2H, m), 7.32-7.28 (1H, m), 5.38 (1H, d,  $J = 1.0$  Hz), 5.15 (1H, q,  $J = 1.0$  Hz), 3.02-2.97 (2H, m), 2.85-2.80 (2H, m), 2.61 (6H, s), 2.1-1.3 (3H, br m);  $^{13}\text{C}$  NMR:  $\delta$  144.8, 139.8, 128.6, 128.0, 126.0, 114.6, 63.6, 51.8, 30.4;  $^{11}\text{B}$  NMR:  $\delta$  -10.2 (q,  $J = 97$  Hz).



## Ionic Hydrogenation of Amine Boranes **26**; Isolation of **29a** and **29b**

Neat MsOH (100  $\mu$ L, 1.54 mmol) was added by syringe to a stirred solution of **26a** (64 mg, 0.50 mmol) in anhydrous DCM (5 mL) under an N<sub>2</sub> atmosphere. After 1 h, the reaction was quenched by addition of 5 mL 5% aq. NaOH, separated and the aqueous layer extracted with 2 x 5 mL DCM. The combined organic layers were dried over Na<sub>2</sub>SO<sub>4</sub> and reduced by rotatory evaporation. The product was purified by flash chromatography (FC) on silica gel (15 cm x 20 mm diameter, 1:2 hexanes/EtOAc), isolating 71 mg (3-methylbutyl)-dimethylamine bis(methylsulfonyloxy)borane (**29a**, 44%): TLC on K6F silica gel 60Å, 1:2 hexanes/EtOAc, R<sub>f</sub> = 0.20. Molecular ion calculated for C<sub>9</sub>H<sub>24</sub>BNNaO<sub>6</sub>S<sub>2</sub>: 340.1036; [M+Na], ESMS found  $m/z$  = 340.1027; IR (neat, cm<sup>-1</sup>) 2508, B–H; 1484, B–N; 1318, B–O; 1173, C–N; <sup>1</sup>H NMR:  $\delta$  3.8-2.8 (1H, br m), 3.07 (6H, s), 2.95-2.90 (2H, m), 2.61 (6H, s), 1.65-1.52 (3H, m), 0.96 (6H, d, J = 6.4 Hz); <sup>13</sup>C NMR:  $\delta$  57.8, 44.5, 38.9, 30.4, 26.6, 22.4; <sup>11</sup>B NMR:  $\delta$  1.0 (d, J = 134 Hz).

The same rocedure was used from **26b** and afforded 3-phenylbutyl)-dimethylamine bis(methylsulfonyloxy)borane **29b**, was purified by reverse-phase PLC on K18F silica gel (70% ): TLC on K18F silica gel 60Å, 4:1 MeOH/H<sub>2</sub>O buffered with 0.5% Et<sub>3</sub>N and 0.5% CF<sub>3</sub>CO<sub>2</sub>H, R<sub>f</sub> = 0.62. Molecular ion calculated for C<sub>14</sub>H<sub>25</sub>BNO<sub>6</sub>S<sub>2</sub>: 378.1216; [M-H], EIMS found  $m/z$  = 378.1215; IR (neat, cm<sup>-1</sup>) 2512, B–H; 1484, B–N; 1322, B–O; 1177, C–N; <sup>1</sup>H NMR:  $\delta$  7.33 (2H, t, J = 7.5 Hz), 7.23 (1H, t, J = 7.3 Hz), 7.18 (2H, d, J = 7.3 Hz), 3.02 (3H, s), 3.01 (3H, s), 2.95 (1H, td, J = 12.7, 4.9 Hz), 2.74-2.66 (1H m), 2.60 (1H, td, J = 12.7, 4.4 Hz), 2.56 (3H, s), 2.52 (3H, s), 2.07-1.90 (2H, m), 1.32 (3H, d, J = 7.1 Hz); <sup>13</sup>C NMR:  $\delta$  145.0, 128.9, 126.8, 126.7, 58.3, 45.0, 44.7, 38.9, 38.9, 38.2, 30.3, 22.5; <sup>11</sup>B NMR:  $\delta$  0.8 (d, J = 111 Hz).

### Conversion of **26a** to **27a** Using Stoichiometric MsOH

Neat MsOH (40  $\mu$ L, 0.62 mmol) was added by syringe to a stirred solution of **26a** (64 mg, 0.50 mmol) in anhydrous DCM (5 mL) under an N<sub>2</sub> atmosphere. After 1 h, the reaction was quenched by addition of 2 mL 5% aq. NaOH, diluted with 3 mL H<sub>2</sub>O, separated and the aqueous layer extracted with 2 x 5 mL DCM. The combined organic layers were dried over Na<sub>2</sub>SO<sub>4</sub> and reduced by rotatory evaporation. The product was purified by flash chromatography (FC) on silica gel (15 cm x 20 mm diameter, 1:2 hexanes/EtOAc), isolating 57 mg (3-methyl-3-butenyl)-dimethylamine methylsulfonyloxy-borane (**27a**, 52%): TLC on K6F silica gel 60Å, 1:2 hexanes/EtOAc, R<sub>f</sub> = 0.37. Molecular ion calculated for C<sub>8</sub>H<sub>20</sub>BNNaO<sub>3</sub>S: 244.1155; [M+Na], ESMS found  $m/z$  = 244.1156; IR (neat, cm<sup>-1</sup>) 2347, B-H; 2325, B-H; 1466, B-N; 1314, B-O; 1146, C-N; <sup>1</sup>H NMR:  $\delta$  4.85 (1H, s), 4.76 (1H, s), 3.0-2.1 (2H, br m), 2.97-2.92 (2H, m), 2.91 (3H, s), 2.61 (6H, s), 2.42-2.36 (2H, m), 1.77 (3H, s); <sup>13</sup>C NMR:  $\delta$  141.1, 112.9, 59.0, 46.9, 37.7, 30.9, 22.6; <sup>11</sup>B NMR:  $\delta$  3.2 to -1.2 (br m).

**4-(Dimethylamino)-2-phenylbutan-2-yl Acetate Borane Complex (30).** To a solution of amine (120 mg, 0.51 mmol) in THF (2 mL) was slowly added BH<sub>3</sub>·THF (0.85 M, 0.9 mL) at 0 °C. The resulting mixture was stirred for 2 h at rt. After removal of solvent, flash chromatography (hexane-ethyl acetate, 5:1) of the residue afforded 107 mg (84%) of the amine borane **30**: IR (neat) 3053, 1733, 2985, 1419, 1095, 895, 704 cm<sup>-1</sup>; <sup>1</sup>H NMR (500 MHz, CDCl<sub>3</sub>)  $\delta$  1.20-2.00 (br m, 3H), 1.87 (s, 3H), 2.10 (s, 3H), 2.38-2.44 (m, 1H), 2.49 (s, 3H), 2.50 (s, 3H), 2.53-2.59 (m, 1H), 2.62-2.73 (m, 2H), 7.26-7.38 (m, 5H); <sup>13</sup>C NMR (125 MHz, CDCl<sub>3</sub>)  $\delta$  22.2, 25.8, 35.9, 51.3, 51.4, 59.7, 82.7, 124.3, 127.4, 128.5, 143.7, 169.5; HRMS (ESI)  $m/z$  C<sub>14</sub>H<sub>24</sub>BNO<sub>2</sub>Na 272.1798 [M+Na]<sup>+</sup>, found 272.1794.

**Ionic Hydrogenation of 30 Activated by TMSOTf; N,N-Dimethyl-3-phenylbutanamine (33).**<sup>6</sup> To a solution of amine borane complex **30** (18 mg, 0.072 mmol) in CH<sub>3</sub>CN (2 mL) was added TMSOTf (25  $\mu$ L) at 0 °C. The mixture was stirred overnight at rt, and quenched by addition of

NaOH (2N). After separation, the aqueous layer was extracted with DCM, the combined organic layers were dried over sodium sulfate and concentrated (vacuum) to give 10.5 mg (83%) of **33<sup>6</sup>** after preparatory TLC using 3 : 1 : 0.02 hexane : ether : triethylamine; <sup>1</sup>H NMR (500 MHz, CDCl<sub>3</sub>) δ 1.27 (d, *J* = 7.0 Hz), 1.71-1.83 (m, 2H), 2.11-2.27 (m, 2H), 2.20 (s, 6H), 2.71-2.79 (m, 1H), 7.17-7.22 (m, 3H), 7.26-7.32 (m, 2H); <sup>13</sup>C NMR (125 MHz, CDCl<sub>3</sub>) δ 22.4, 36.0, 38.0, 45.4, 57.9, 125.8, 126.9, 128.3, 147.3.

**2-((Dimethylamino)methyl)-1-methyl-1,2,3,4-tetrahydronaphthalen-1-yl Acetate Borane Complex (Footnote 7, *i*).** The same procedure was used as for the preparation of **30** to give *I*; IR (neat) 3052, 1733, 1456, cm<sup>-1</sup>; <sup>1</sup>H NMR (500 MHz, CDCl<sub>3</sub>) δ 1.20-2.10 (br m, 3H), 1.92 (s, 3H), 2.08 (s, 3H), 2.17-2.24 (m, 1H), 2.33-2.41 (m, 1H), 2.60 (s, 3H), 2.61 (s, 3H), 2.70-2.75 (m, 1H), 2.82-2.90 (m, 2H), 2.94-3.02 (m, 2H), 7.10-7.15 (m, 1H), 7.18-7.24 (m, 2H), 7.60-7.64 (m, 1H); <sup>13</sup>C NMR (125 MHz, CDCl<sub>3</sub>) δ 22.5, 24.7, 25.7, 28.1, 38.4, 51.5, 52.9, 63.2, 83.0, 126.0, 126.6, 127.6, 129.0, 135.1, 138.8, 170.1; HRMS (ESI) *m/z* C<sub>16</sub>H<sub>26</sub>BNO<sub>2</sub>Na 298.1954 [M+Na]<sup>+</sup>, found 298.1951.

**N,N-Dimethyl(1-methyl-1,2,3,4-tetrahydronaphthalen-2-yl)methanamine (Footnote 7, *ii*).** The same procedure was used as for the ionic hydrogenation of **30** and gave *ii* in 52% yield as a mixture of diastereoisomer (*dr* = 2.7:1) from *i* (starting *dr* = 3.5:1): major isomer IR (neat) 3052, 2985, 1419 cm<sup>-1</sup>; <sup>1</sup>H NMR (500 MHz, CDCl<sub>3</sub>) δ 1.32 (d, *J* = 7.4 Hz, 3H), 1.60-1.68 (m, 1H), 1.76-1.84 (m, 1H), 1.96-2.08 (m, 1H), 2.12-2.28 (m, 2H), 2.24 (s, 3H), 2.27 (s, 3H), 2.64-2.76 (m, 2H), 2.82-2.88 (m, 1H), 7.05-7.18 (m, 4H); <sup>13</sup>C NMR (125 MHz, CDCl<sub>3</sub>) δ 17.5, 22.5, 24.1, 26.2, 36.2, 37.4, 46.0, 63.5, 125.4, 129.4, 136.1, 141.1; HRMS (ESI) *m/z* C<sub>14</sub>H<sub>22</sub>N 204.1752 [M+H]<sup>+</sup>, found 204.1745.

### Reaction of **26b** with (+)-Camphorsulfonic Acid

Solid (+)-camphorsulfonic acid (CSA, **34**, 35 mg, 0.15 mmol) was added to a stirred solution of **26b** (25 mg, 0.13 mmol) in anhydrous DCM (5 mL) which was then quickly capped with a septum and an N<sub>2</sub> inlet. After stirring 2 h, neat MsOH (15  $\mu$ L, 0.23 mmol) was added by syringe, monitoring the reaction by MS. After 1 h, the major peak corresponded to **36**. The solvent was then removed by a stream of N<sub>2</sub>, and the residue was dissolved in MeOH (1.0 mL) which was then acidified by addition of 0.10 mL 6M aq. HCl before heating to reflux 16 h. The mixture was cooled to rt, made alkaline with 5% aq. NaOH and extracted with Et<sub>2</sub>O (2 x 5 mL), the organic layers dried over MgSO<sub>4</sub> and reduced by rotatory evaporation. The product was purified by PLC on silica gel (20 x 20 cm x 250  $\mu$ m, 65:33:2 hexanes/acetone/Et<sub>3</sub>N), isolating 12 mg (3-phenylbutyl)-dimethylamine (**33**, 53%, 68% ee). Conditions for enantiomeric excess assay by HPLC (Chiralcel OD column, 0.1% *i*PrOH/hexane, 1 mL/min) were optimized using racemic **33**, obtained by hydrolysis of *rac*-**29b** with HCl, with peaks at 13 and 23 minutes (peak at 40 minutes for (3-phenyl-3-butenyl)-dimethylamine impurity).

### Reaction of Me<sub>3</sub>N·BH<sub>3</sub> (**37**) with (–)-Camphorsulfonic Acid

Solid (–)-camphorsulfonic acid (*ent*-CSA, *ent*-**34**, 152 mg, 0.65 mmol) was added to a stirred solution of Me<sub>3</sub>N·BH<sub>3</sub> (**37**, 43 mg, 0.59 mmol) in anhydrous DCM (2.2 mL) which was then quickly capped with a septum and an N<sub>2</sub> inlet. After stirring 4 h the solution was washed with H<sub>2</sub>O (5 mL), the layers separated and the aqueous layer extracted with 5 mL DCM. The combined organic layers were dried over Na<sub>2</sub>SO<sub>4</sub> and reduced by rotatory evaporation. The residue was taken up in minimal DCM (ca. 1 mL) and hexanes was added until the solution started to turn cloudy (ca. 15 mL). The flask was left open to allow solvent evaporation, collecting the long needles that formed after 1 d, rinsing with hexanes and collecting 41 mg trimethylamine ((1*S*,2*R*,4*R*)-2-hydroxy-7,7-dimethyl-bicyclo[2.2.1]hept-1-yl)-methylsulfonyloxyborane (**38**, 27%):

Molecular ion calculated for C<sub>13</sub>H<sub>25</sub>BNO<sub>4</sub>S: 302.1597; [M-H<sub>2</sub>-H<sup>-</sup>], EIMS found  $m/z$  = 302.1595; IR (neat, cm<sup>-1</sup>) 3512, O-H, 2427, B-H; 2342, B-H; 1468, B-N; 1316, B-O; 1138, C-N; <sup>1</sup>H NMR: δ 4.15-4.08 (1H, m), 3.44 (1H, d, J = 14.0 Hz), 3.37 (1H, d, J = 3.3 Hz), 2.93 (1H, d, J = 14.0 Hz), 2.90 (1H, d, J = 4.0 Hz), 2.8-2.0 (2H, br m), 2.64 (9H, s), 1.88-1.47 (6H, m), 1.08 (3H, s), 0.83 (3H, s); <sup>13</sup>C NMR: δ 76.4, 50.0, 49.9, 49.7, 48.5, 44.5, 38.8, 30.5, 27.4, 20.6, 19.9; <sup>11</sup>B NMR: δ 3.4 to -0.2 (br m).

### References for Supporting Information

- (1) Harris, R. K.; Becker, E. D.; Cabral De Menezes, S. M.; Goodfellow, R.; Granger, P. *Pure Appl. Chem.* **2001**, *73*, 1795.
- (2) Shapland, P.; Vedejs, E. *J. Org. Chem.* **2004**, *69*, 4094.
- (3) Imamoto, T.; Oshiki, T.; Onozawa, T.; Kusumoto, T.; Sato, K. *J. Am. Chem. Soc.* **1990**, *112*, 5244.
- (4) Krafft, M. E.; Juliano, C. A.; Scott, I. L.; Wright, C.; McEachin, M. D. *J. Am. Chem. Soc.* **1991**, *113*, 1693.
- (5) Aoyama, H.; Sugiyama, J.-I.; Yoshida, M.; Hatori, H.; Hosomi, A. *J. Org. Chem.* **1992**, *57*, 3037.
- (6) Bussas, R.; Muenster, H.; Kresze, G. *J. Org. Chem.* **1983**, *48*, 2828.

# X-ray Crystal Structure of **38**

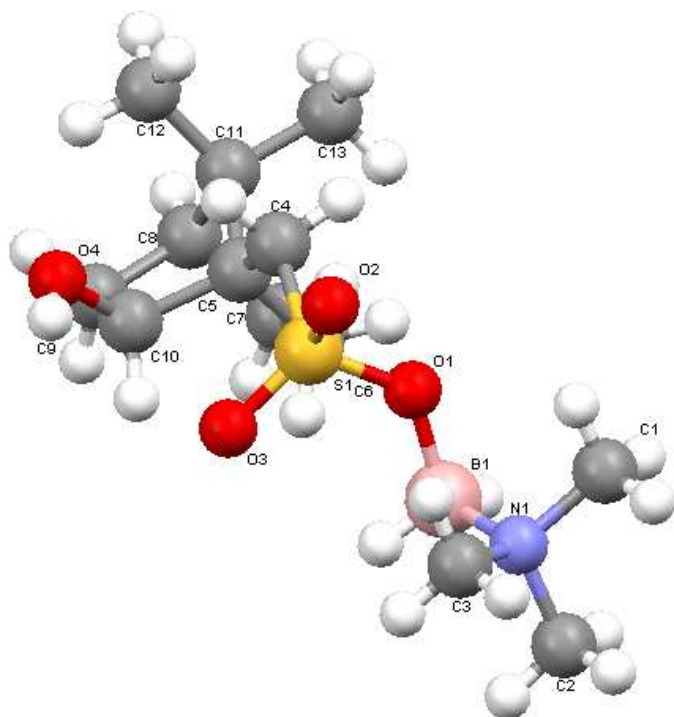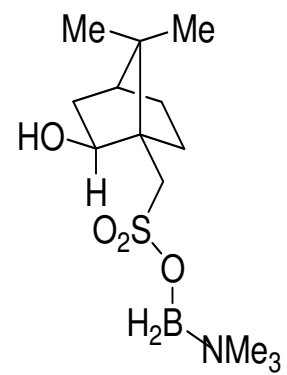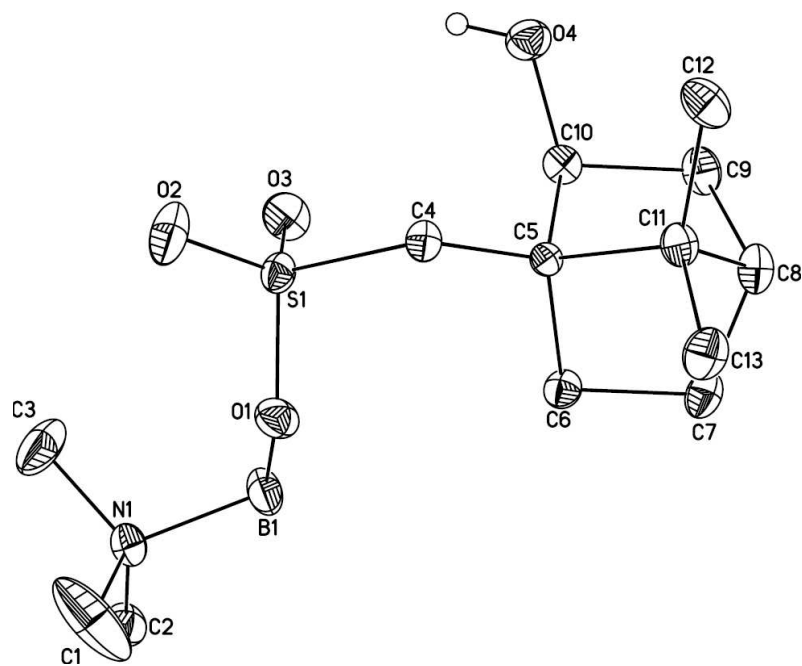

**Table 1.** Crystal data and structure refinement for **38**.

|                                 |                                                                                                               |
|---------------------------------|---------------------------------------------------------------------------------------------------------------|
| Identification code             | <b>38</b>                                                                                                     |
| Empirical formula               | C <sub>13</sub> H <sub>28</sub> B N O <sub>4</sub> S                                                          |
| Formula weight                  | 305.23                                                                                                        |
| Temperature                     | 85(2) K                                                                                                       |
| Wavelength                      | 0.71073 Å                                                                                                     |
| Crystal system, space group     | Orthorhombic, P2(1)2(1)2(1)                                                                                   |
| Unit cell dimensions            | a = 6.8265(5) Å    alpha = 90 deg.<br>b = 9.4699(8) Å    beta = 90 deg.<br>c = 24.772(2) Å    gamma = 90 deg. |
| Volume                          | 1601.4(2) Å <sup>3</sup>                                                                                      |
| Z, Calculated density           | 4, 1.266 Mg/m <sup>3</sup>                                                                                    |
| Absorption coefficient          | 0.214 mm <sup>-1</sup>                                                                                        |
| F(000)                          | 664                                                                                                           |
| Crystal size                    | 0.50 x 0.34 x 0.22 mm                                                                                         |
| Theta range for data collection | 1.64 to 28.34 deg.                                                                                            |
| Limiting indices                | -9<=h<=9, -12<=k<=12, -33<=l<=33                                                                              |
| Reflections collected / unique  | 57330 / 3997 [R(int) = 0.0376]                                                                                |
| Completeness to theta = 28.34   | 100.0 %                                                                                                       |

|                                      |                                       |
|--------------------------------------|---------------------------------------|
| Absorption correction                | Semi-empirical from equivalents       |
| Max. and min. transmission           | 0.9545 and 0.9007                     |
| Refinement method                    | Full-matrix least-squares on $F^2$    |
| Data / restraints / parameters       | 3997 / 0 / 190                        |
| Goodness-of-fit on $F^2$             | 1.171                                 |
| Final R indices [ $I > 2\sigma(I)$ ] | $R1 = 0.0330$ , $wR2 = 0.0892$        |
| R indices (all data)                 | $R1 = 0.0332$ , $wR2 = 0.0893$        |
| Absolute structure parameter         | 0.04(6)                               |
| Largest diff. peak and hole          | 0.356 and -0.189 e. $\text{\AA}^{-3}$ |

**Table 2.** Atomic coordinates ( $\times 10^4$ ) and equivalent isotropic displacement parameters ( $\text{\AA}^2 \times 10^3$ ) for **4-25**.  $U(\text{eq})$  is defined as one third of the trace of the orthogonalized  $U_{ij}$  tensor.

|      | x       | y        | z       | $U(\text{eq})$ |
|------|---------|----------|---------|----------------|
| B(1) | 3664(3) | 6617(2)  | 8546(1) | 26(1)          |
| N(1) | 4294(2) | 5263(1)  | 8193(1) | 18(1)          |
| S(1) | 502(1)  | 7984(1)  | 8102(1) | 17(1)          |
| O(1) | 1510(2) | 6860(1)  | 8448(1) | 22(1)          |
| O(2) | -633(2) | 7258(2)  | 7697(1) | 30(1)          |
| O(3) | 1845(2) | 9044(1)  | 7918(1) | 26(1)          |
| O(4) | -708(2) | 11747(1) | 8363(1) | 23(1)          |



|       |          |          |         |       |
|-------|----------|----------|---------|-------|
| C(1)  | 2985(3)  | 4063(2)  | 8310(1) | 59(1) |
| C(2)  | 6321(3)  | 4857(2)  | 8345(1) | 26(1) |
| C(3)  | 4276(3)  | 5583(3)  | 7609(1) | 45(1) |
| C(4)  | -1217(2) | 8733(2)  | 8555(1) | 15(1) |
| C(5)  | -429(2)  | 9704(1)  | 8990(1) | 12(1) |
| C(6)  | 1174(2)  | 9081(2)  | 9361(1) | 17(1) |
| C(7)  | 1072(2)  | 10025(2) | 9875(1) | 22(1) |
| C(8)  | -559(2)  | 11080(2) | 9733(1) | 20(1) |
| C(9)  | 260(2)   | 12077(2) | 9299(1) | 22(1) |
| C(10) | 396(2)   | 11134(2) | 8787(1) | 16(1) |
| C(11) | -2028(2) | 10165(2) | 9410(1) | 16(1) |
| C(12) | -3744(2) | 11000(2) | 9172(1) | 23(1) |
| C(13) | -2899(2) | 8950(2)  | 9737(1) | 21(1) |

---

**Table 3.** Bond lengths [Å] and angles [deg] for **38**.

---

|                |            |
|----------------|------------|
| B(1)-O(1)      | 1.507(2)   |
| B(1)-N(1)      | 1.610(2)   |
| N(1)-C(1)      | 1.474(2)   |
| N(1)-C(3)      | 1.478(2)   |
| N(1)-C(2)      | 1.485(2)   |
| S(1)-O(3)      | 1.4340(12) |
| S(1)-O(2)      | 1.4428(12) |
| S(1)-O(1)      | 1.5306(11) |
| S(1)-C(4)      | 1.7716(14) |
| O(4)-C(10)     | 1.4174(18) |
| C(4)-C(5)      | 1.5162(18) |
| C(5)-C(6)      | 1.5458(19) |
| C(5)-C(10)     | 1.5510(19) |
| C(5)-C(11)     | 1.5692(19) |
| C(6)-C(7)      | 1.556(2)   |
| C(7)-C(8)      | 1.536(2)   |
| C(8)-C(9)      | 1.536(2)   |
| C(8)-C(11)     | 1.548(2)   |
| C(9)-C(10)     | 1.554(2)   |
| C(11)-C(13)    | 1.527(2)   |
| C(11)-C(12)    | 1.532(2)   |
| O(1)-B(1)-N(1) | 107.18(13) |
| C(1)-N(1)-C(3) | 110.3(2)   |
| C(1)-N(1)-C(2) | 108.39(15) |
| C(3)-N(1)-C(2) | 108.03(14) |
| C(1)-N(1)-B(1) | 110.15(15) |
| C(3)-N(1)-B(1) | 111.43(14) |
| C(2)-N(1)-B(1) | 108.48(12) |
| O(3)-S(1)-O(2) | 117.10(8)  |
| O(3)-S(1)-O(1) | 112.21(7)  |
| O(2)-S(1)-O(1) | 107.45(7)  |

|                   |            |
|-------------------|------------|
| O(3)-S(1)-C(4)    | 110.20(7)  |
| O(2)-S(1)-C(4)    | 105.97(7)  |
| O(1)-S(1)-C(4)    | 102.78(6)  |
| B(1)-O(1)-S(1)    | 129.38(12) |
| C(5)-C(4)-S(1)    | 117.27(10) |
| C(4)-C(5)-C(6)    | 116.26(11) |
| C(4)-C(5)-C(10)   | 115.32(11) |
| C(6)-C(5)-C(10)   | 105.60(11) |
| C(4)-C(5)-C(11)   | 113.19(12) |
| C(6)-C(5)-C(11)   | 101.81(11) |
| C(10)-C(5)-C(11)  | 102.98(10) |
| C(5)-C(6)-C(7)    | 103.59(12) |
| C(8)-C(7)-C(6)    | 102.69(12) |
| C(7)-C(8)-C(9)    | 107.17(13) |
| C(7)-C(8)-C(11)   | 102.92(12) |
| C(9)-C(8)-C(11)   | 102.57(12) |
| C(8)-C(9)-C(10)   | 103.89(12) |
| O(4)-C(10)-C(5)   | 113.89(12) |
| O(4)-C(10)-C(9)   | 109.76(12) |
| C(5)-C(10)-C(9)   | 102.41(11) |
| C(13)-C(11)-C(12) | 107.18(12) |
| C(13)-C(11)-C(8)  | 113.56(12) |
| C(12)-C(11)-C(8)  | 113.95(13) |
| C(13)-C(11)-C(5)  | 114.34(12) |
| C(12)-C(11)-C(5)  | 114.82(12) |
| C(8)-C(11)-C(5)   | 92.76(11)  |

---

Symmetry transformations used to generate equivalent atoms:

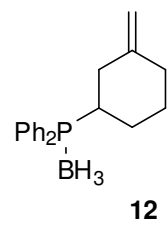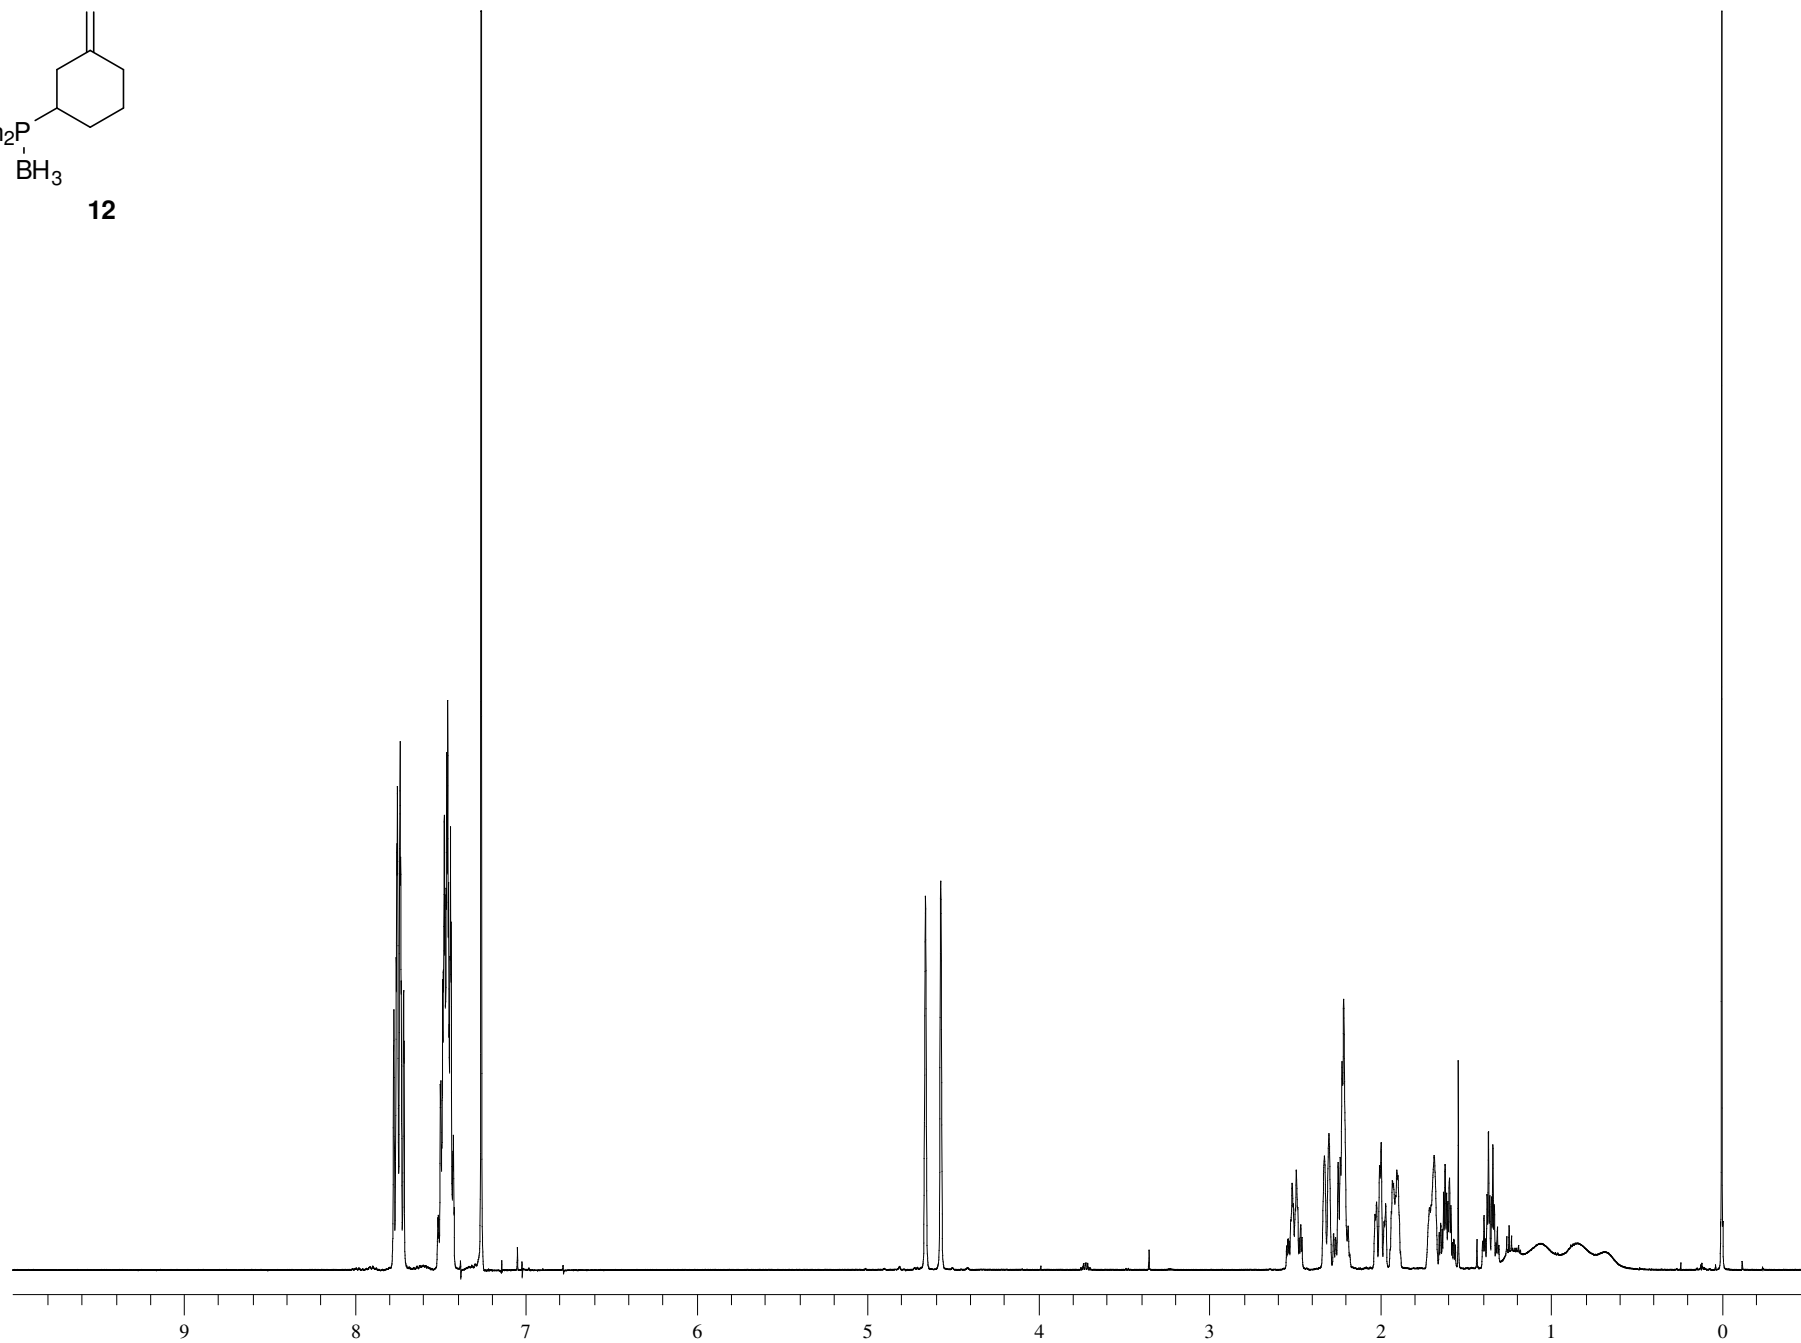

File: tdvVI-168b-C-char

Pulse Sequence: s2pul

Solvent: cdcl3

Ambient temperature

Operator: tdevries

File: tdvVI-168b-C-char

INNOVA-400 "Kr.chem.lsa.umich.edu"

Relax. delay 0.100 sec

Pulse 45.0 degrees

Acq. time 1.300 sec

Width 24140.0 Hz

1600 repetitions

OBSERVE C13, 100.5712664 MHz

DECOUPLE H1, 399.9669644 MHz

Power 39 dB

continuously on

WALTZ-16 modulated

DATA PROCESSING

Line broadening 0.8 Hz

FT size 65536

Total time 37 min, 34 sec

Acquisition date: Oct 11 2007

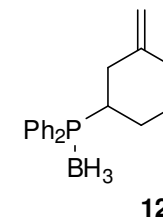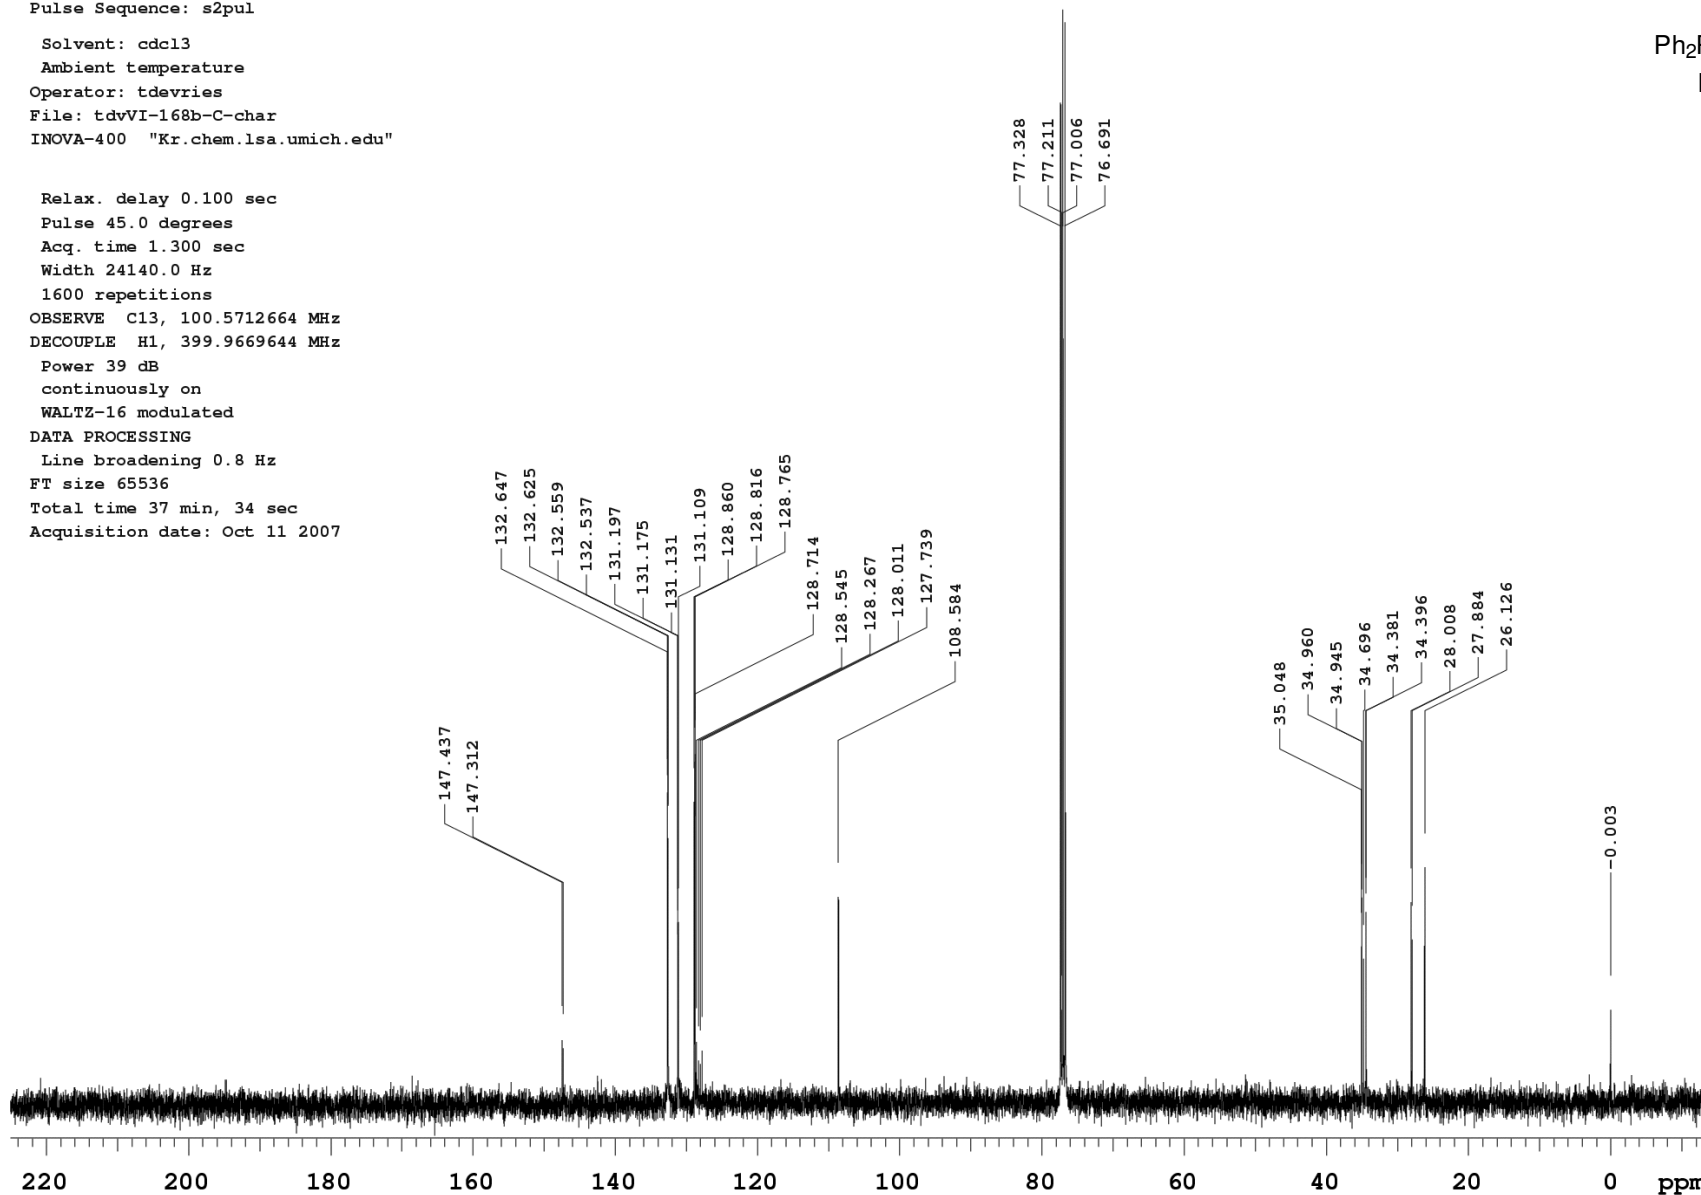

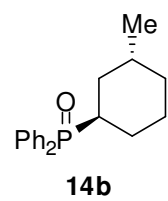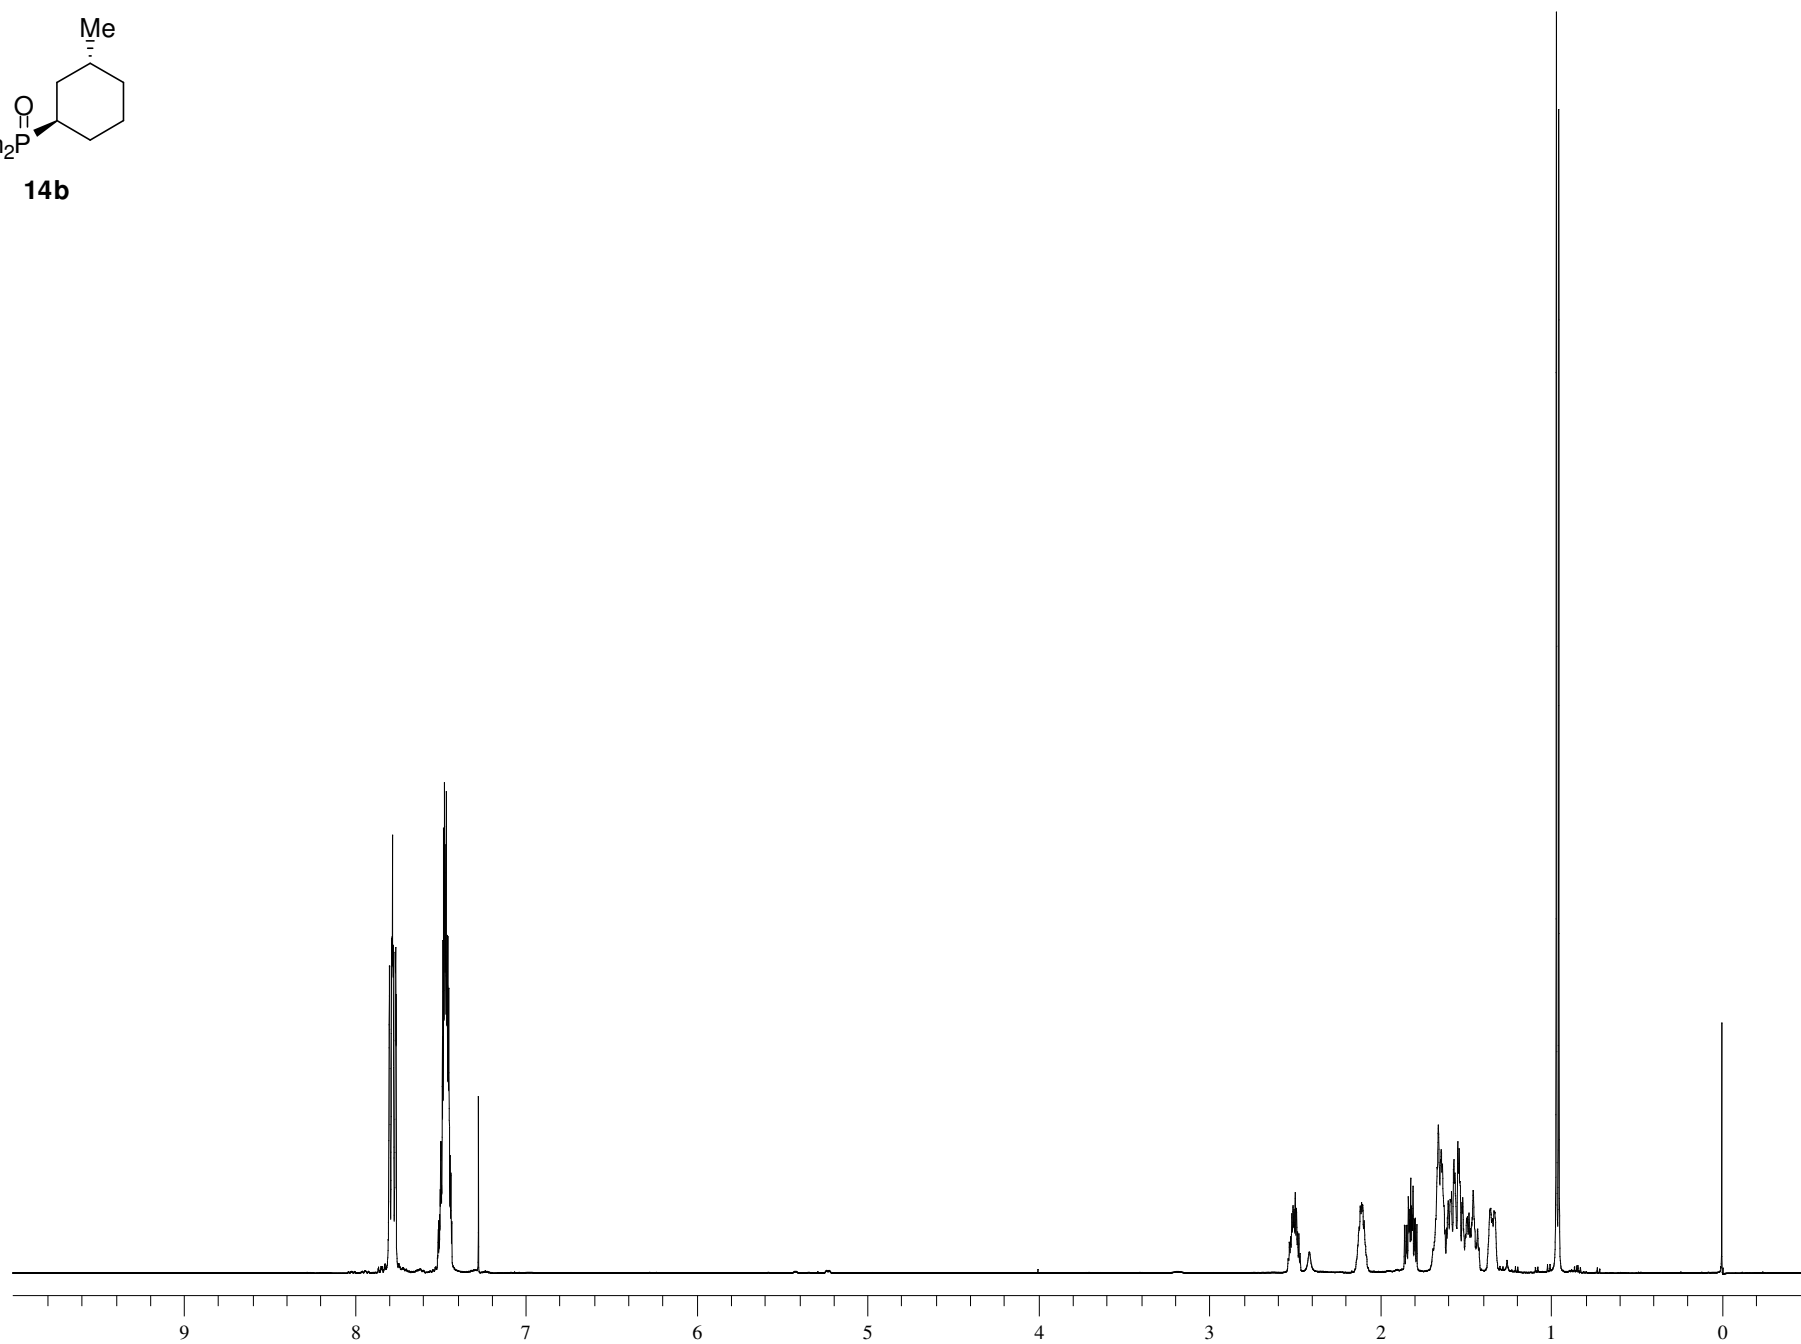

tdvVI-180b-C

File: Carbon

Pulse Sequence: s2pul

Solvent: cdcl3

Ambient temperature

Operator: tdevries

INOVA-400 "Zr.Chem.LSA.UMich.Edu"

Relax. delay 0.100 sec

Pulse 45.0 degrees

Acq. time 1.300 sec

Width 24140.0 Hz

80 repetitions

OBSERVE C13, 100.5712647 MHz

DECOUPLE H1, 399.9669644 MHz

Power 39 dB

continuously on

WALTZ-16 modulated

DATA PROCESSING

Line broadening 0.8 Hz

FT size 65536

Total time 1 min, 52 sec

Acquisition date: Nov 6 2007

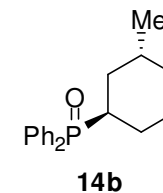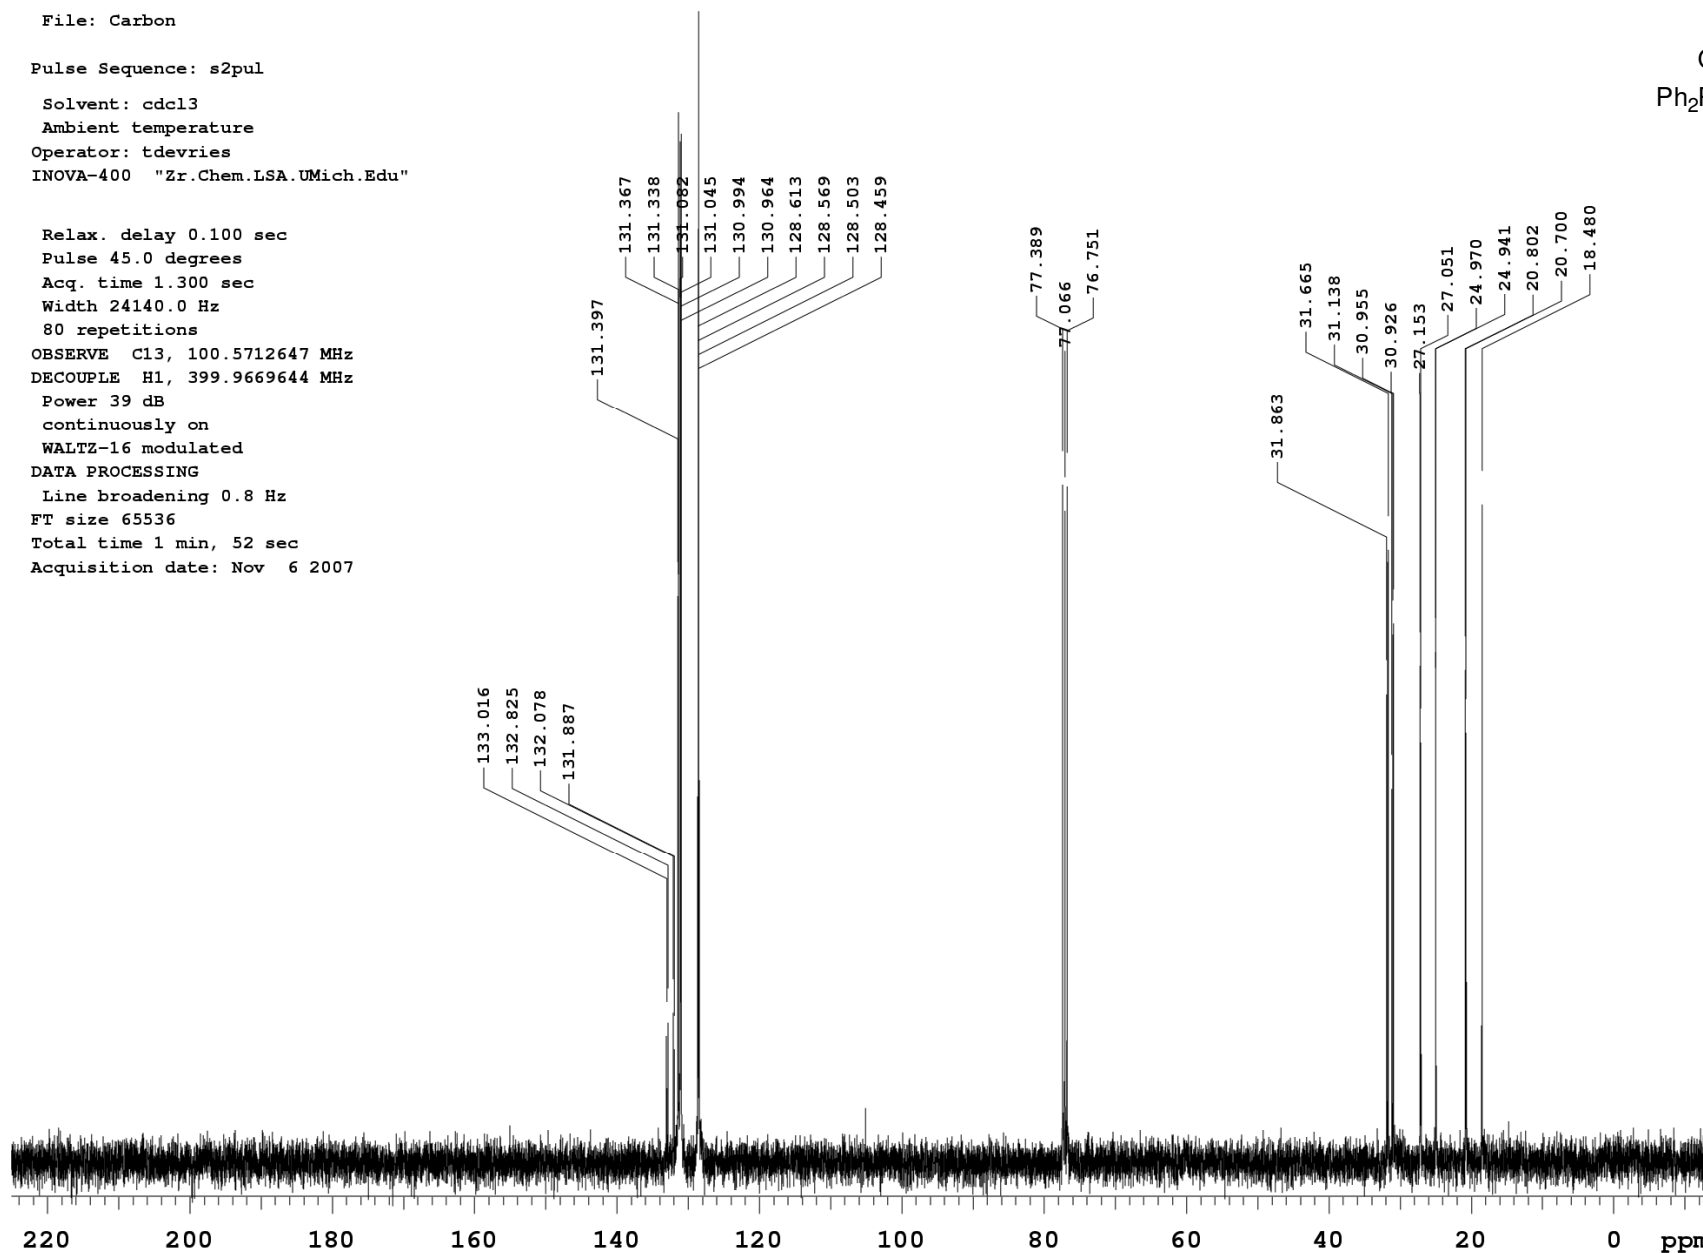

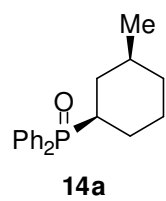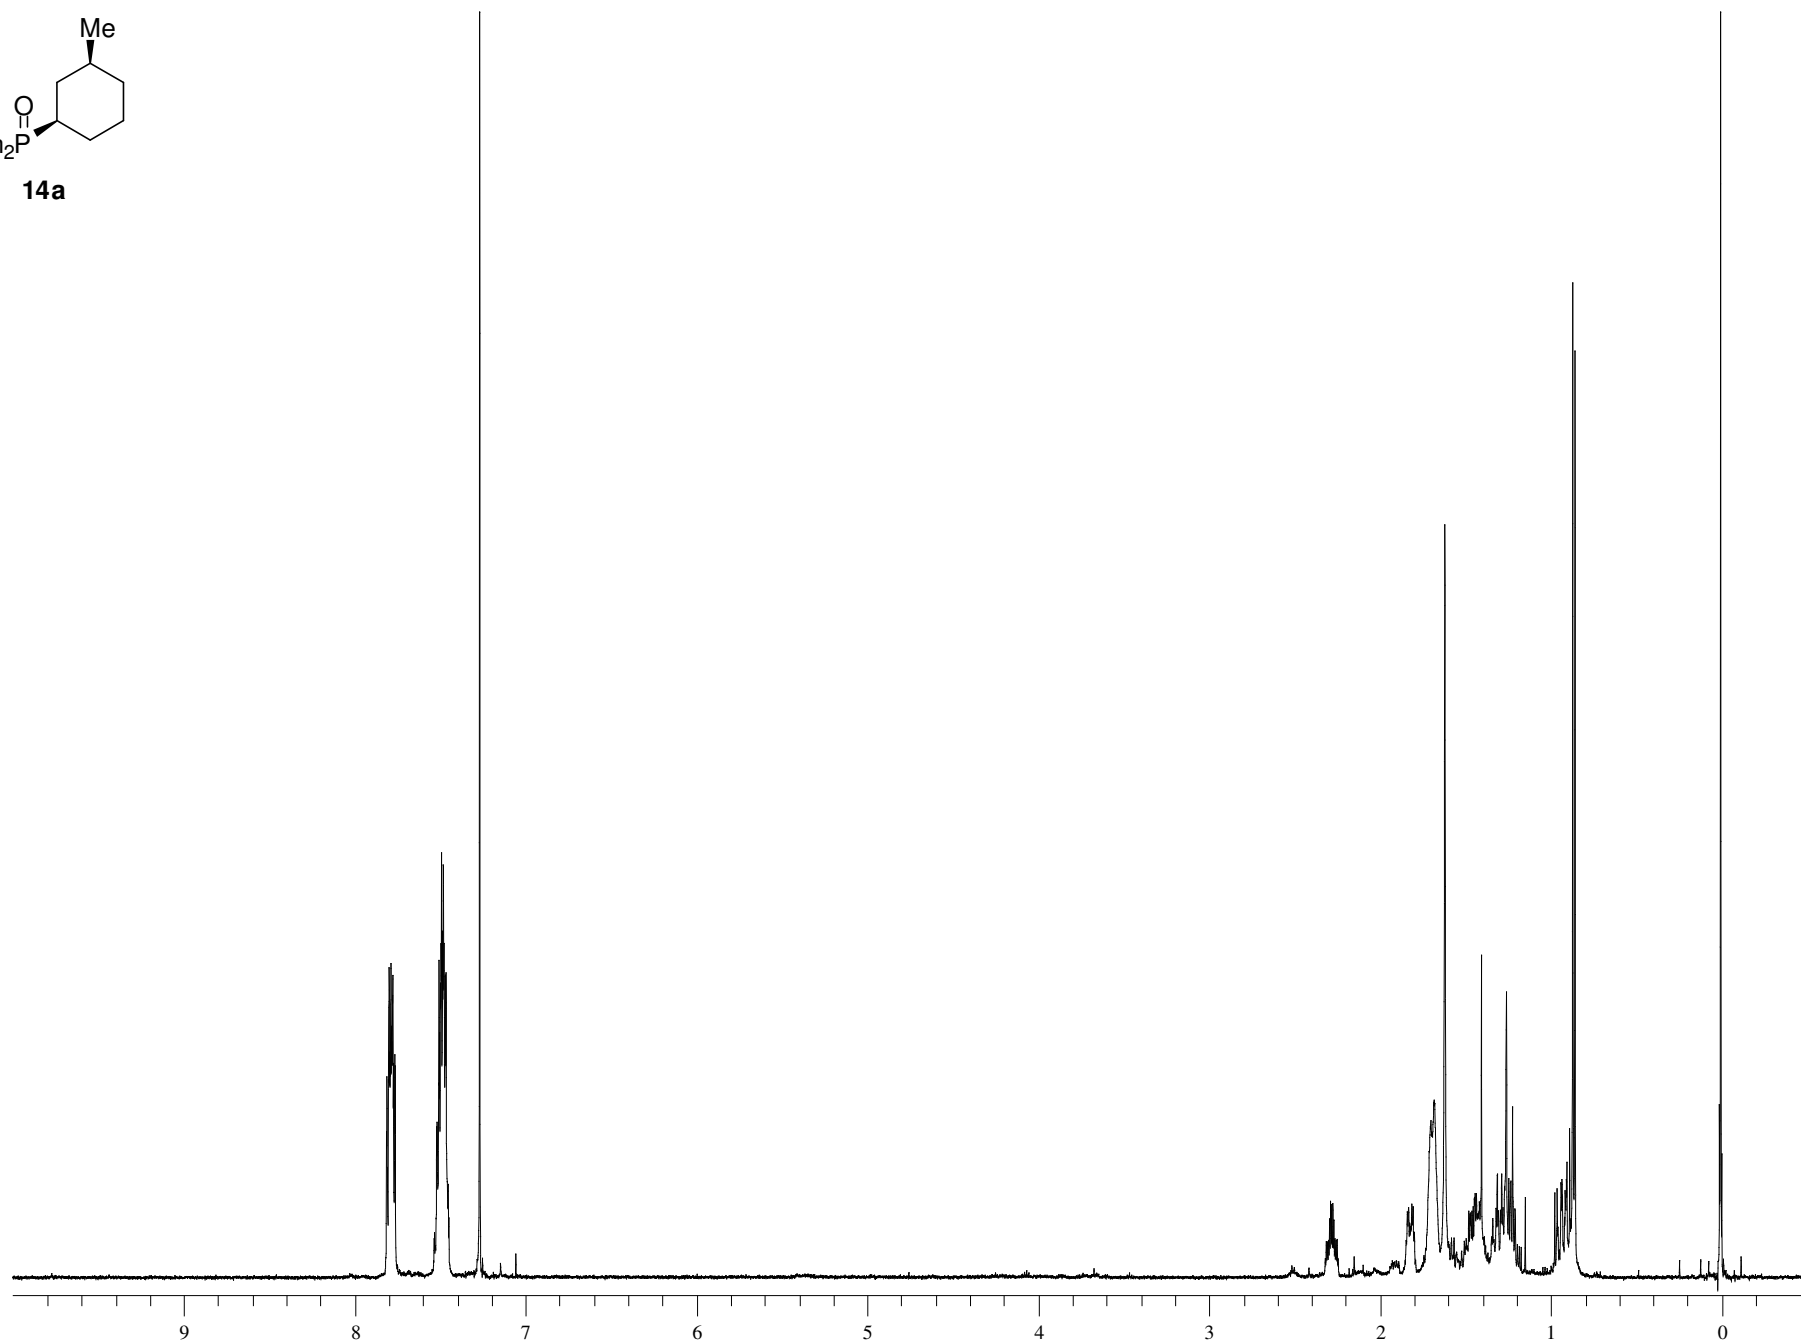



tdvVI-186-16

File: Carbon

Pulse Sequence: s2pul

Solvent: cdcl3

Ambient temperature

Operator: tdevries

INOVA-500 "Sn.Chem.LSA.UMich.Edu"

Relax. delay 0.100 sec

Pulse 30.0 degrees

Acq. time 1.300 sec

Width 30165.9 Hz

3520 repetitions

OBSERVE C13, 125.7010259 MHz

DECOUPLE H1, 499.9067532 MHz

Power 38 dB

continuously on

WALTZ-16 modulated

DATA PROCESSING

Line broadening 1.0 Hz

FT size 131072

Total time 1 hr, 22 min, 43 sec

Acquisition date: Nov 12 2007

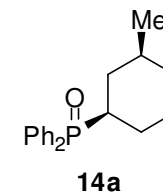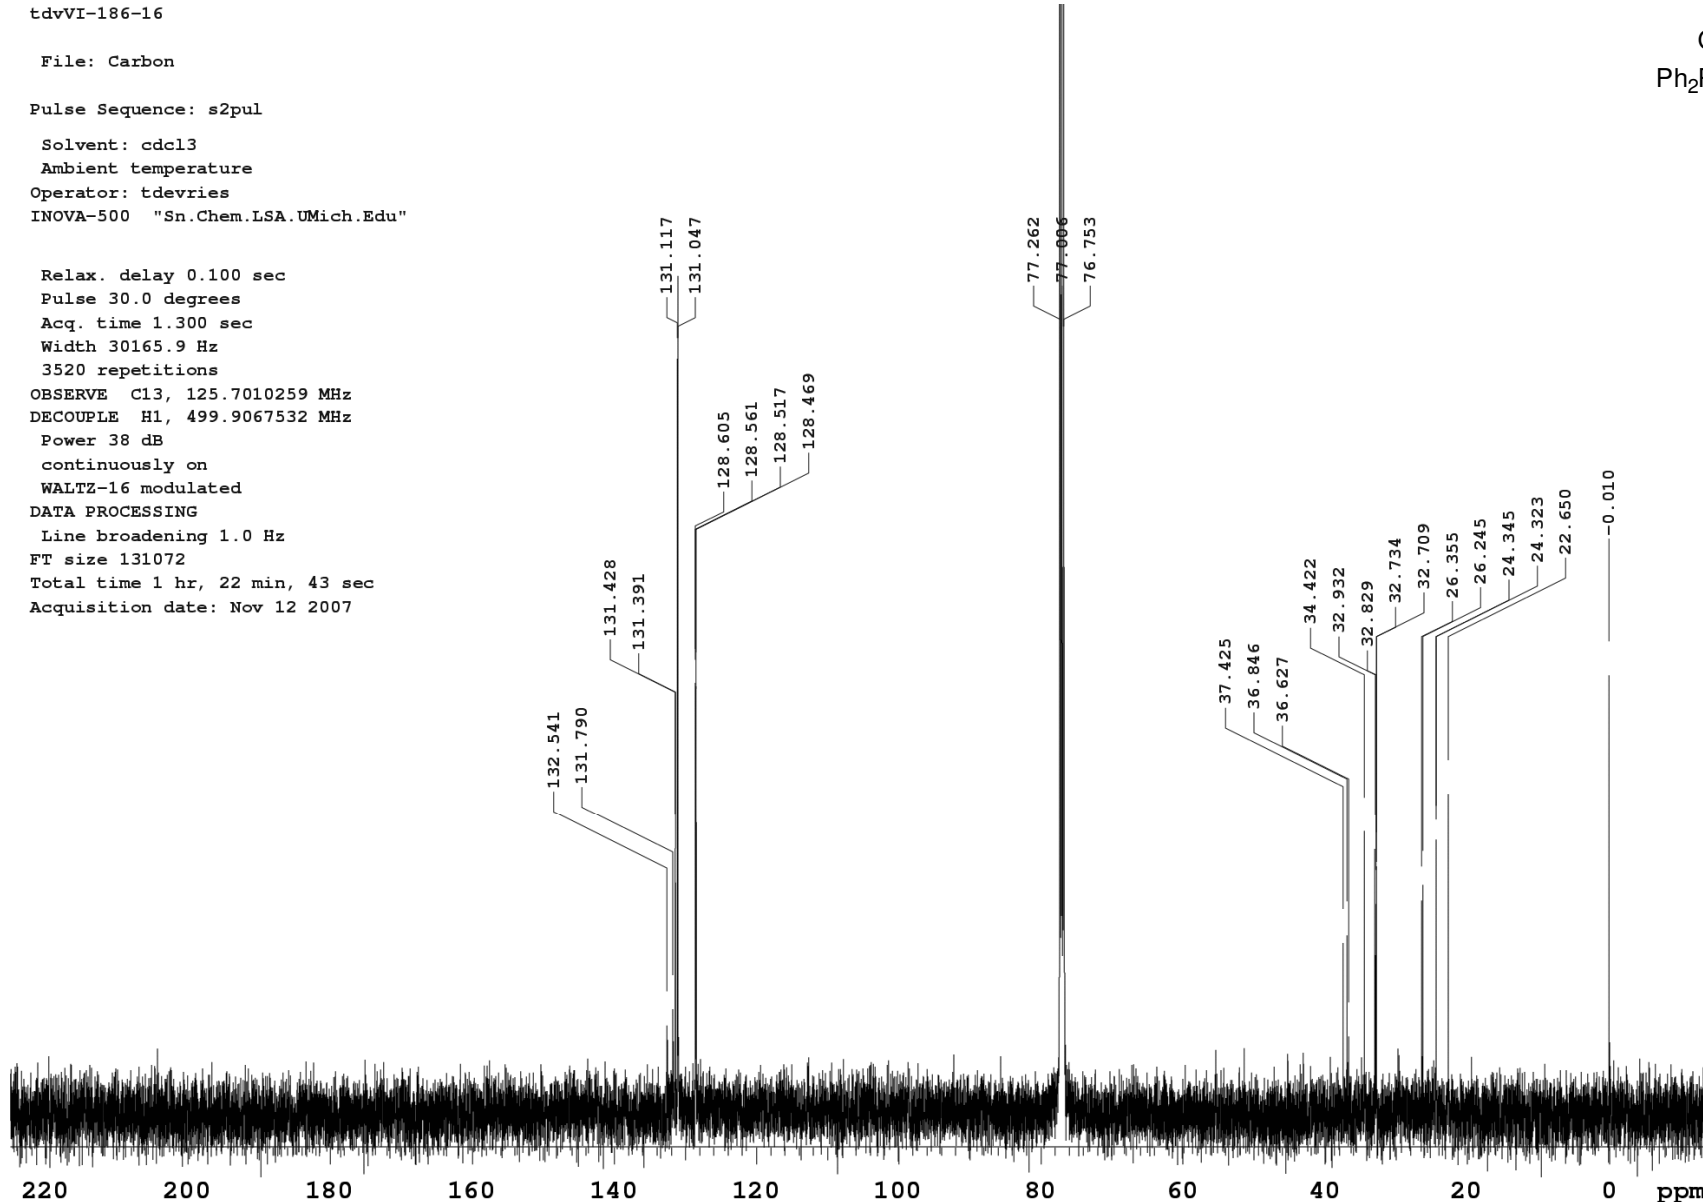

SM-138-1H-Pure

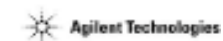

Sample Name:

Data Collected on:

Sn.Chem.LSA.UMich.edu-inova500

Archive directory:

Sample directory:

File: SM-138-1H-Pure

Pulse Sequence: PROTON (s2pul)

Solvent: cdcl3

Data collected on: May 17 2011

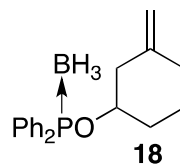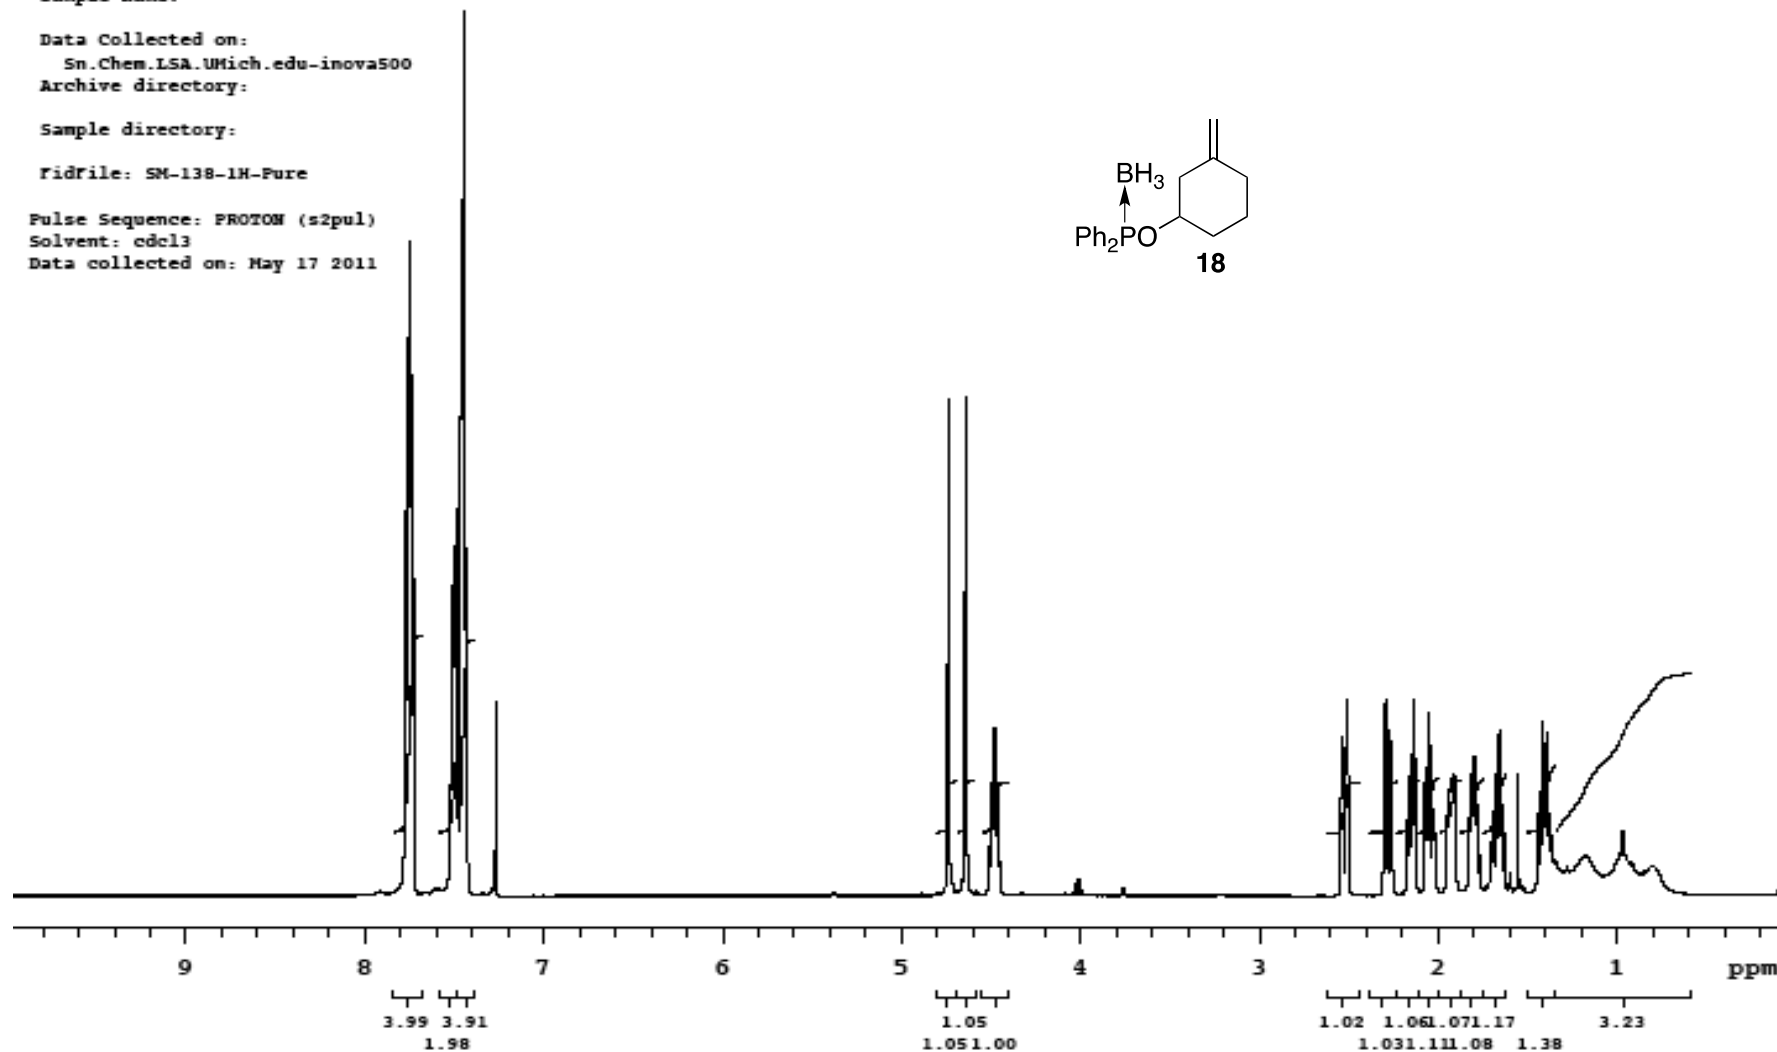

SM-138-C13

Sample Name:

Data Collected on:

Sn.Chem.LSA.UMich.edu-inova500

Archive directory:

Sample directory:

Filename: SM-138-C13

Pulse Sequence: CARBON (s2pul)

Solvent: cdcl3

Data collected on: May 18 2011

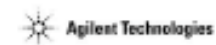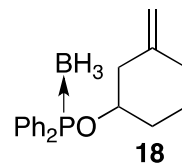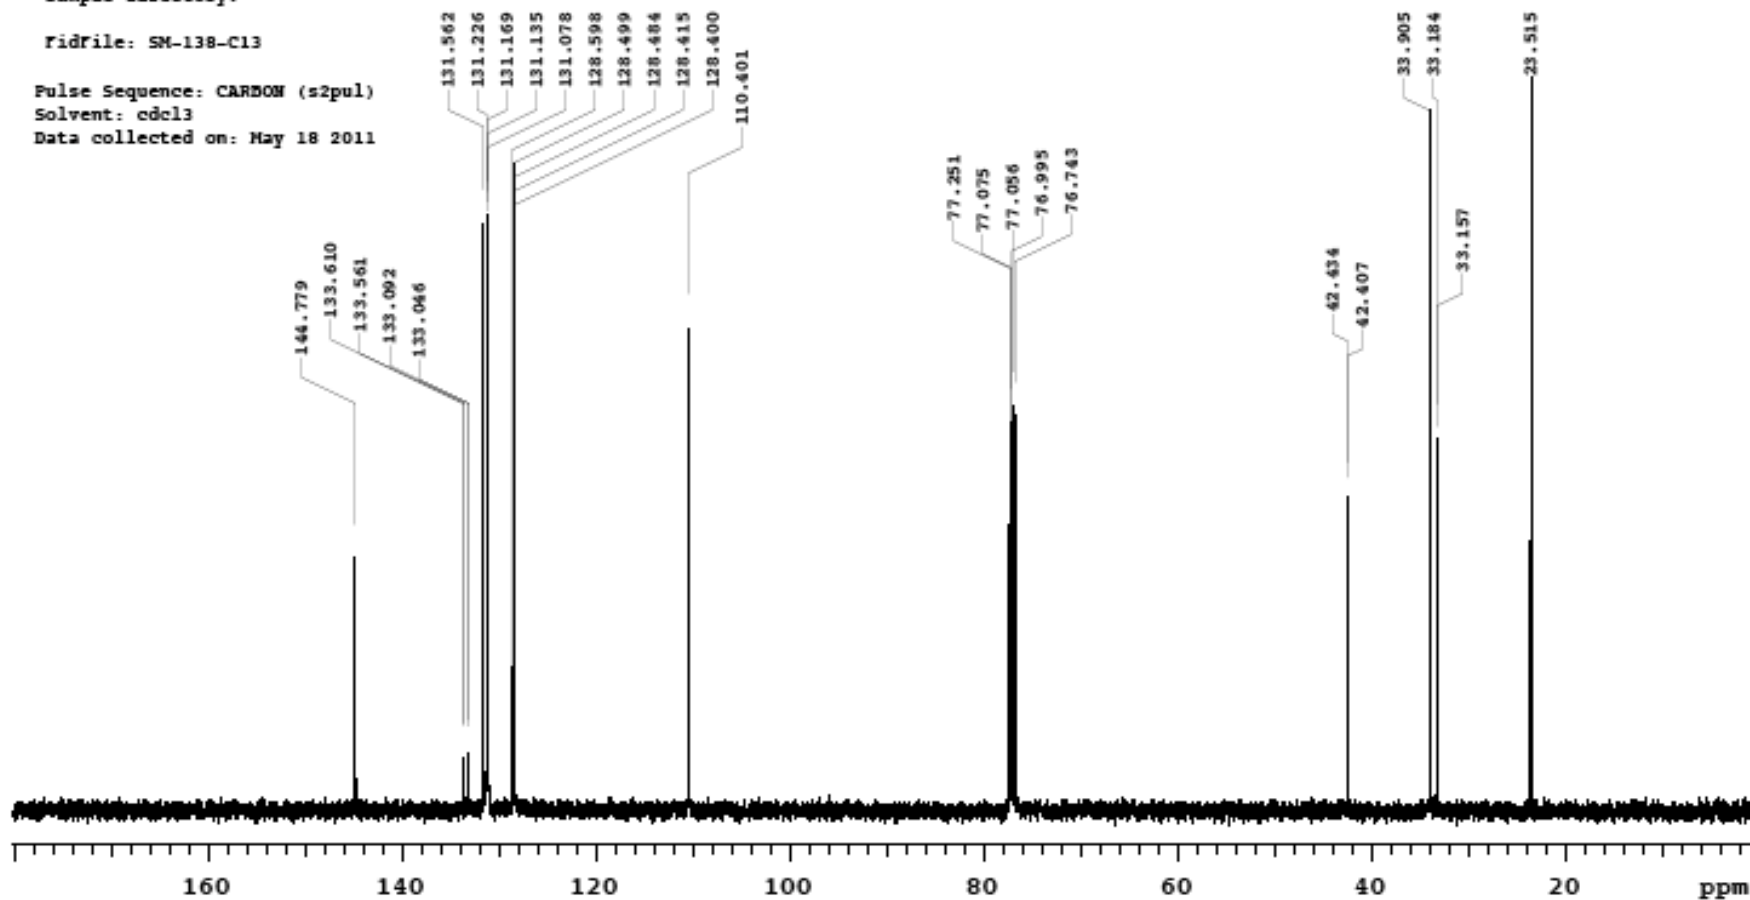

SM-155-1H-minorisomer-pure

Sample Name:

Data Collected on:

Sn.Chem.LSA.UMich.edu-inova500

Archive directory:

Sample directory:

Fidfile: SM-156-1H-pure

Pulse Sequence: PROTON (s2pul)

Solvent: cdcl3

Data collected on: Jul 6 2011

Agilent Technologies

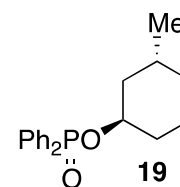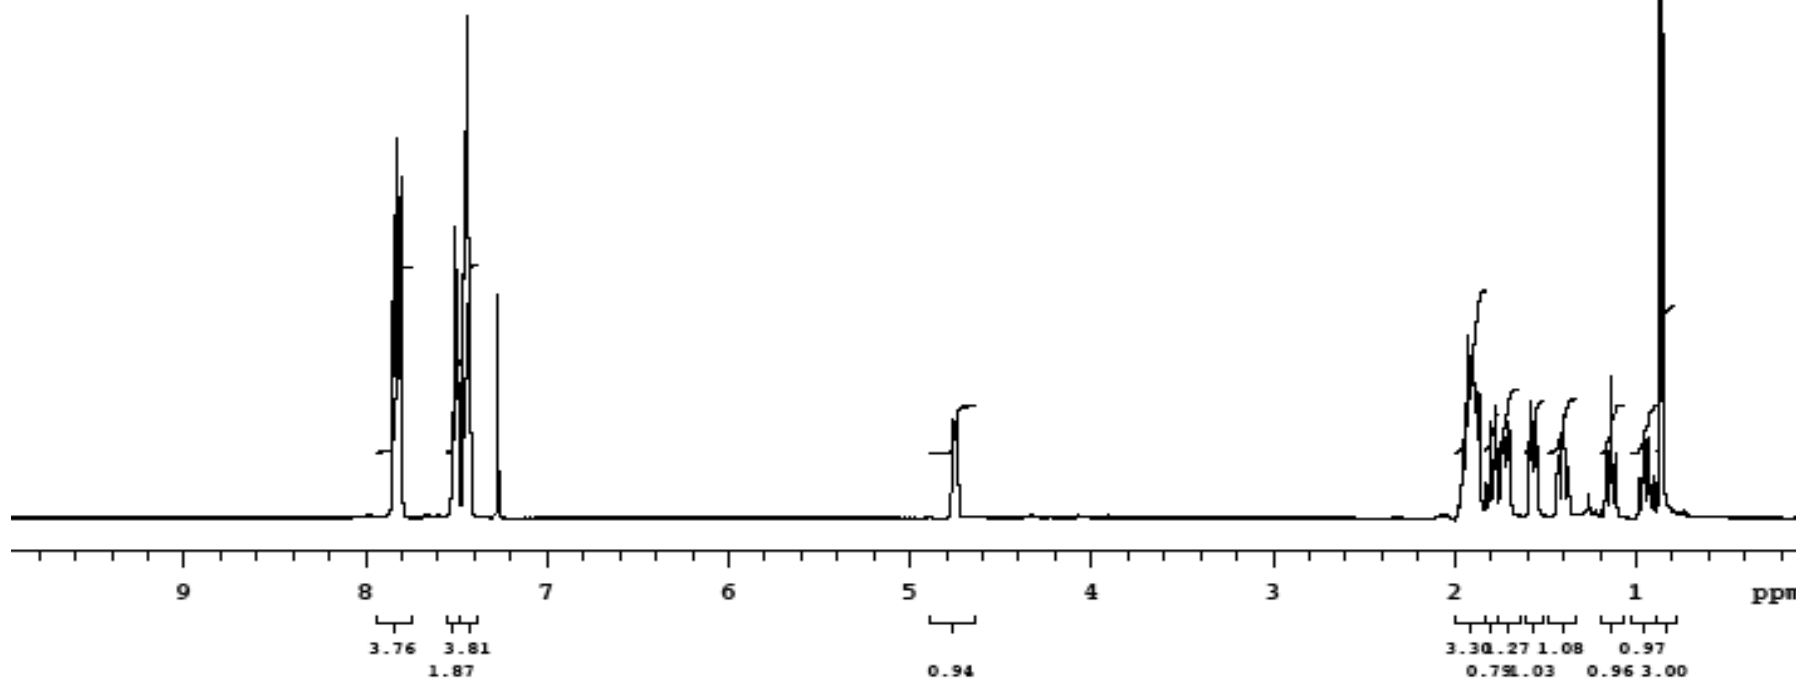

Sample Name:

Data Collected on:

Yb-vnmrs700

Archive directory:

Sample directory:

Fidfile: SM-156-C13-Pure

Pulse Sequence: CARBON (s2pul)

Solvent: cdcl3

Data collected on: Jul 7 2011

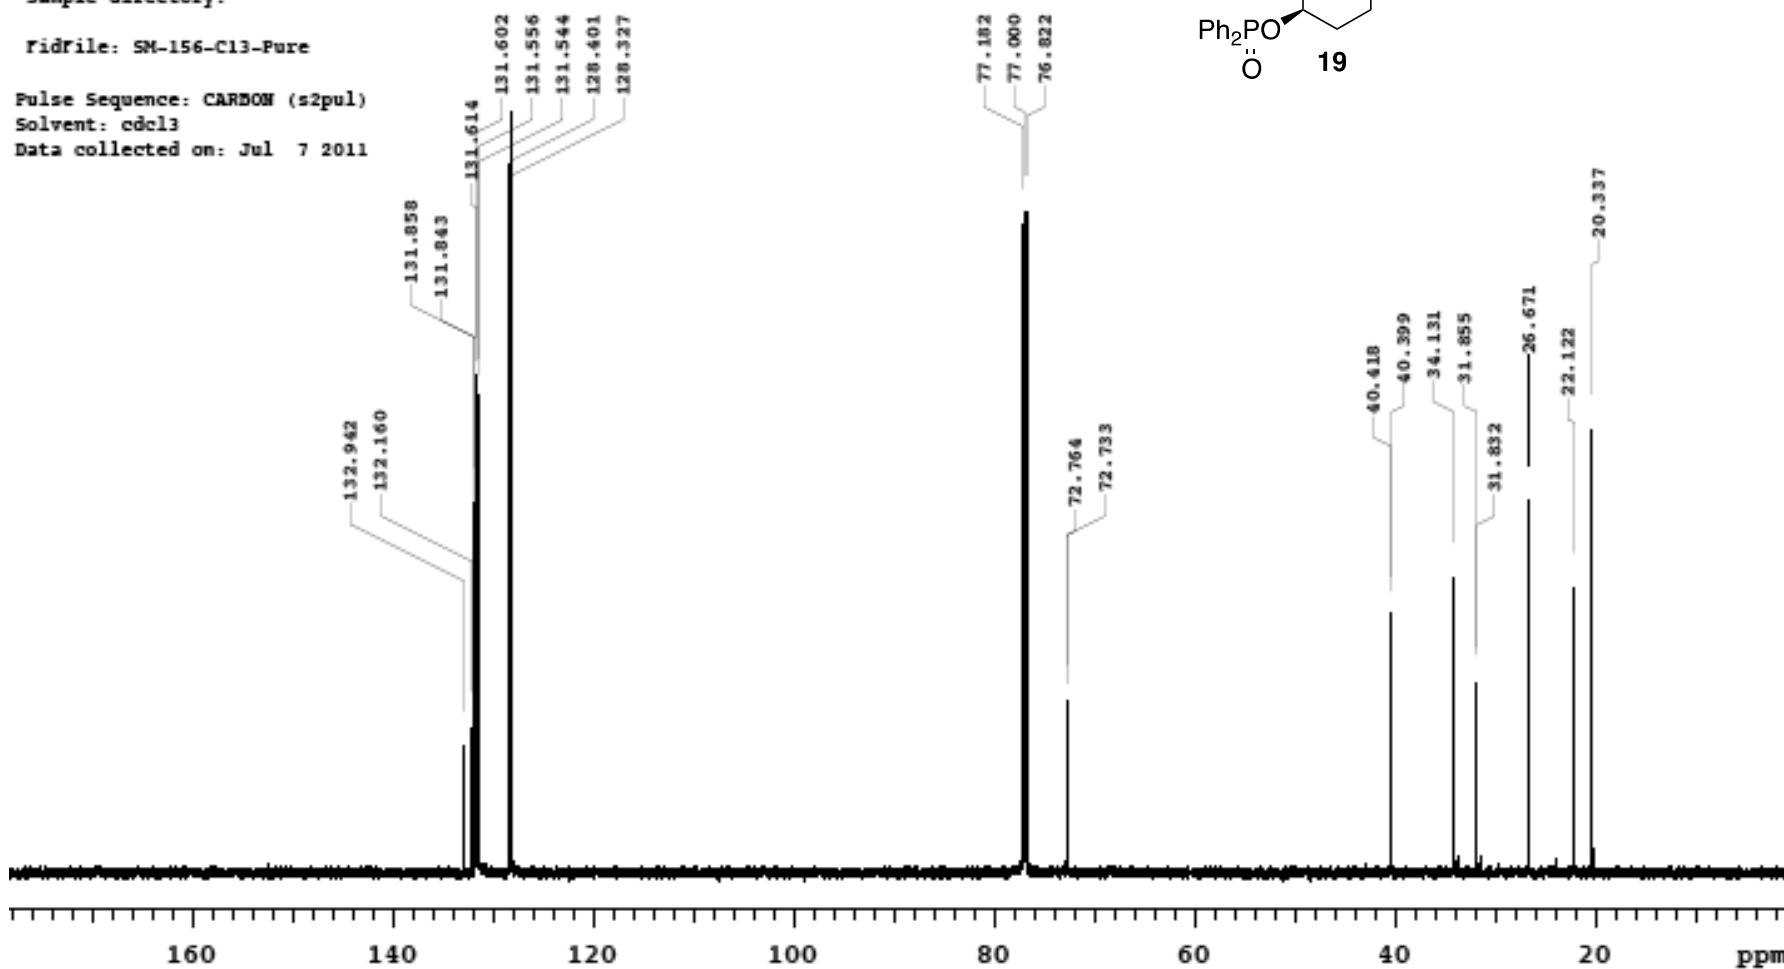

Sample Name:

Data Collected on:

Yb-vnmrs700

Archive directory:

Sample directory:

FidFile: SM-108-1H-pure

Pulse Sequence: PROTON (s2pul)

Solvent: cdcl3

Data collected on: Jul 19 2011

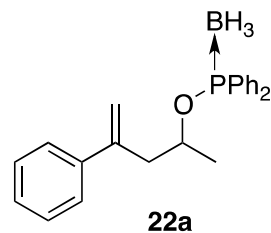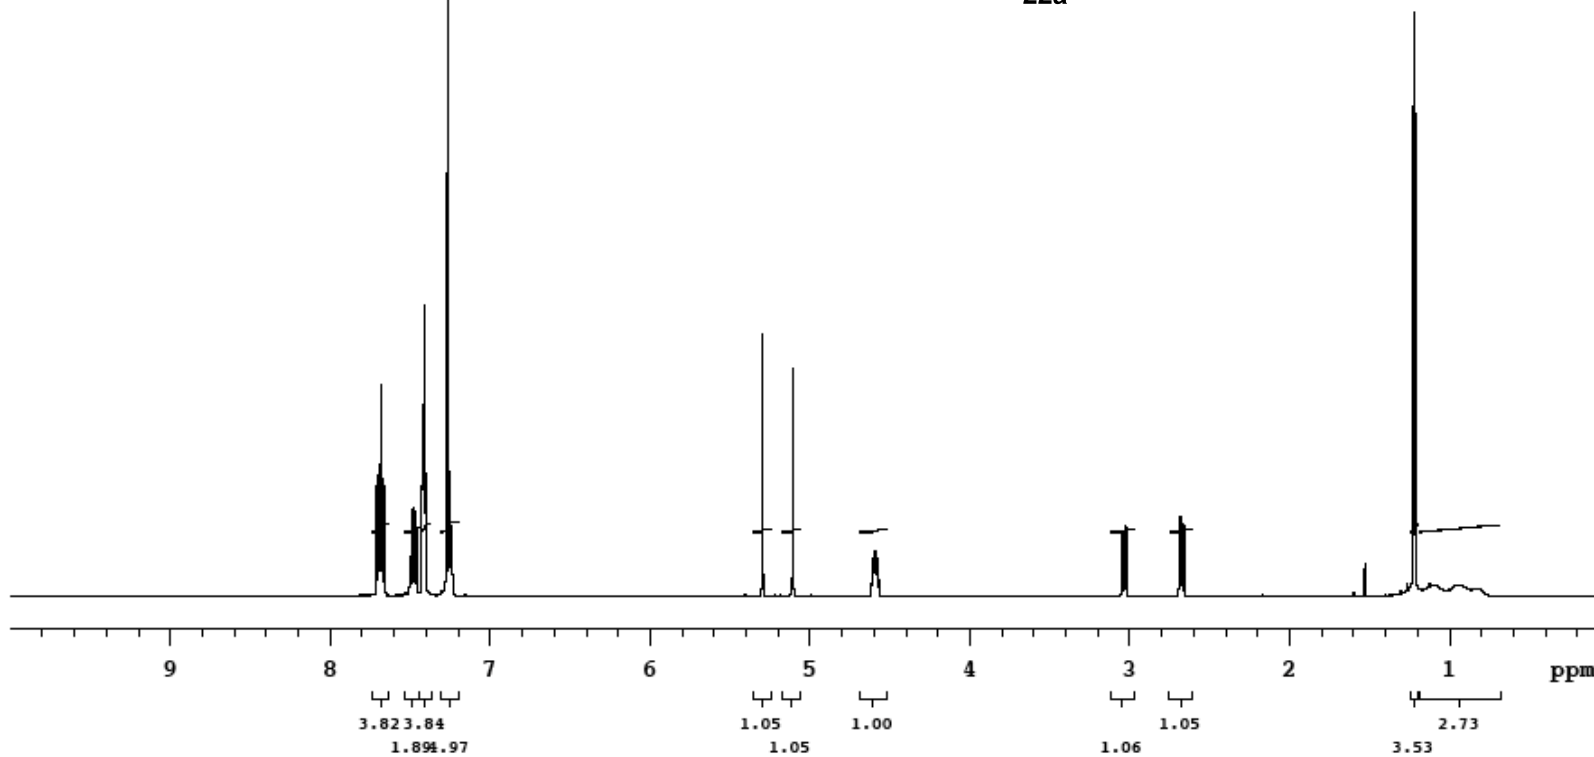

SM-108-C13

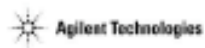

Sample Name:

Data Collected on:

Yb-vnmrs700

Archive directory:

Sample directory:

File: SM-108-C13

Pulse Sequence: CARBON (s2pul)

Solvent: cdcl3

Data collected on: Jul 19 2011

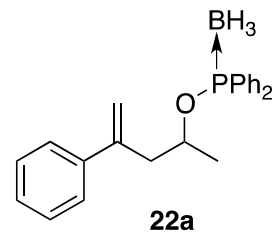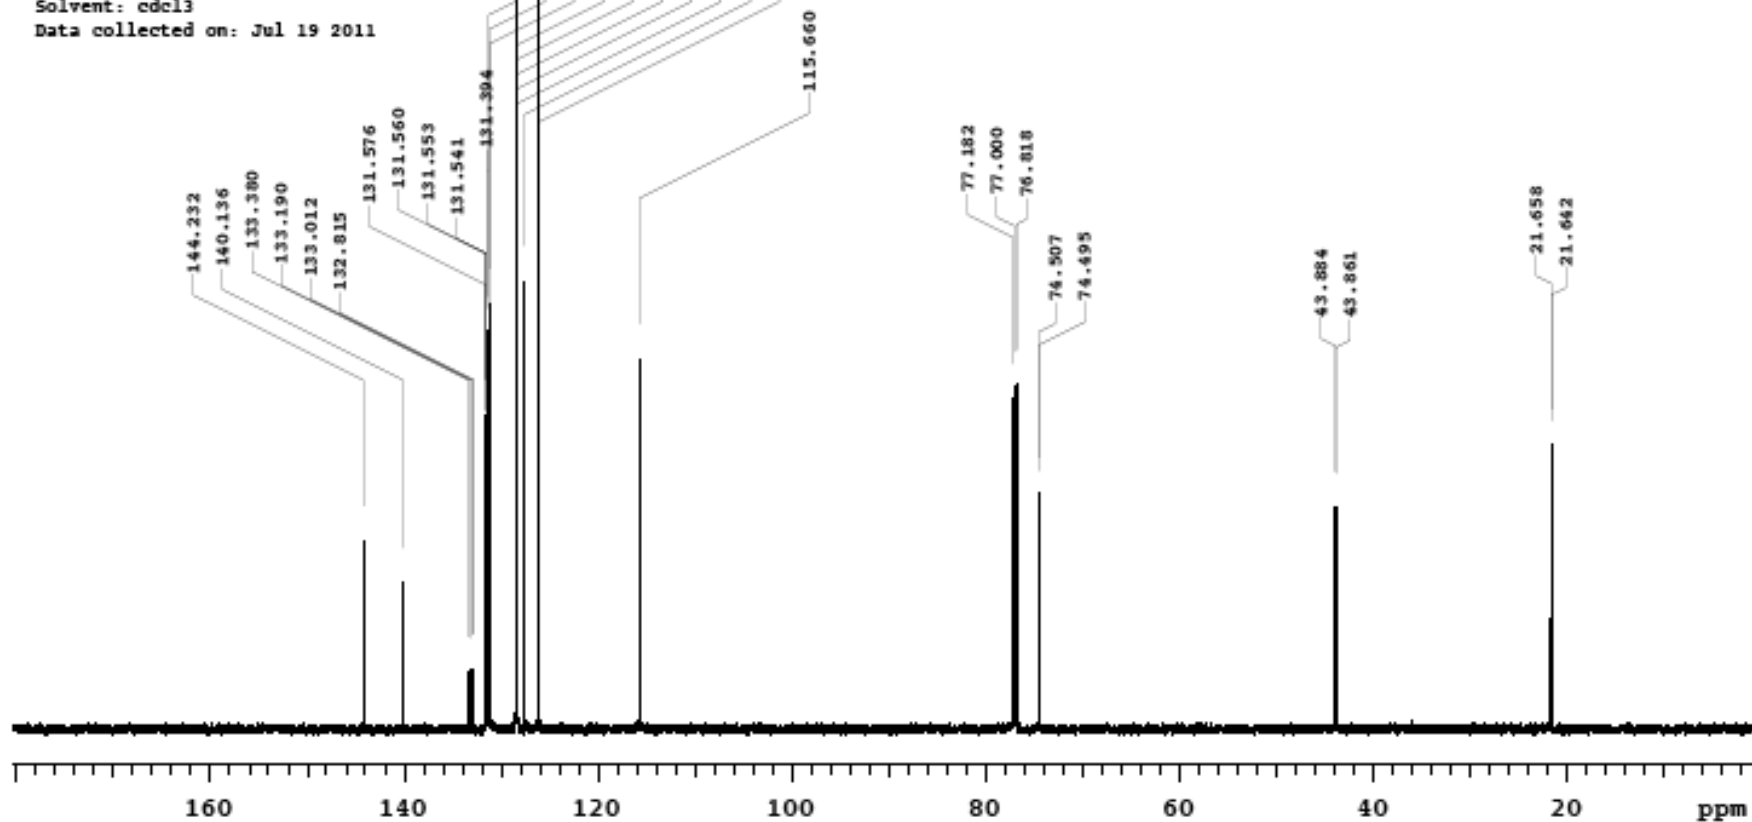



**22b**

Sn.Chem.LSA.UMich.edu-inova500

Archive directory:

Sample directory:

Ridfile: SM-145-1H-Pure

Pulse Sequence: PROTON (s2pul)

Solvent:  $\text{cdcl}_3$

Data collected on: May 24 2011

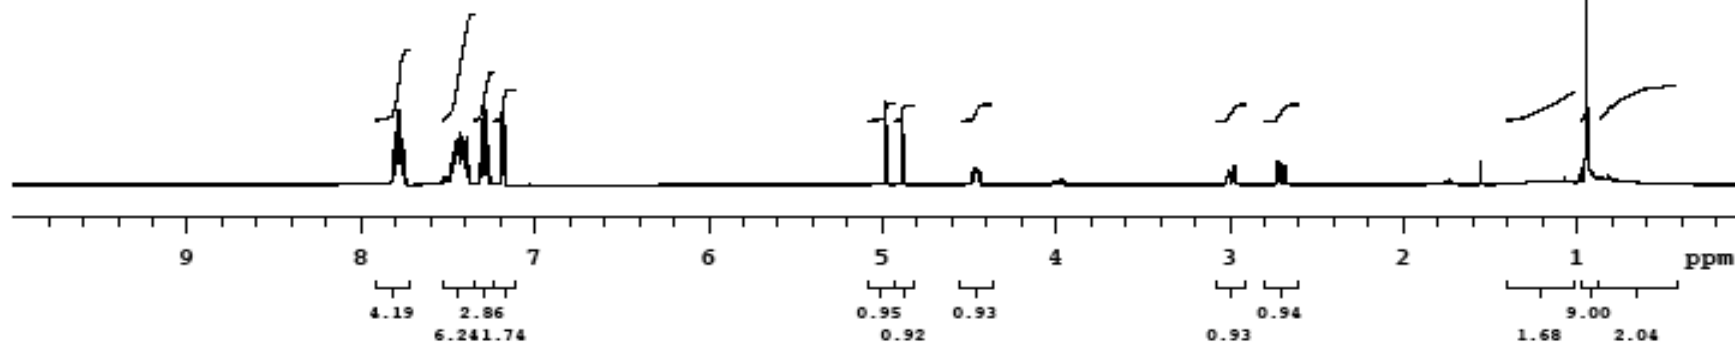



SM-145-C13-Pure

Sample Name:

Data Collected on:

Sn.Chem.LSA.UMich.edu-inova500

Archive directory:

Sample directory:

File: SM-145-C13-Pure

Pulse Sequence: CARBON (s2pul)

Solvent: cdcl3

Data collected on: May 24 2011

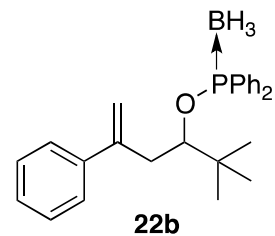

Agilent Technologies

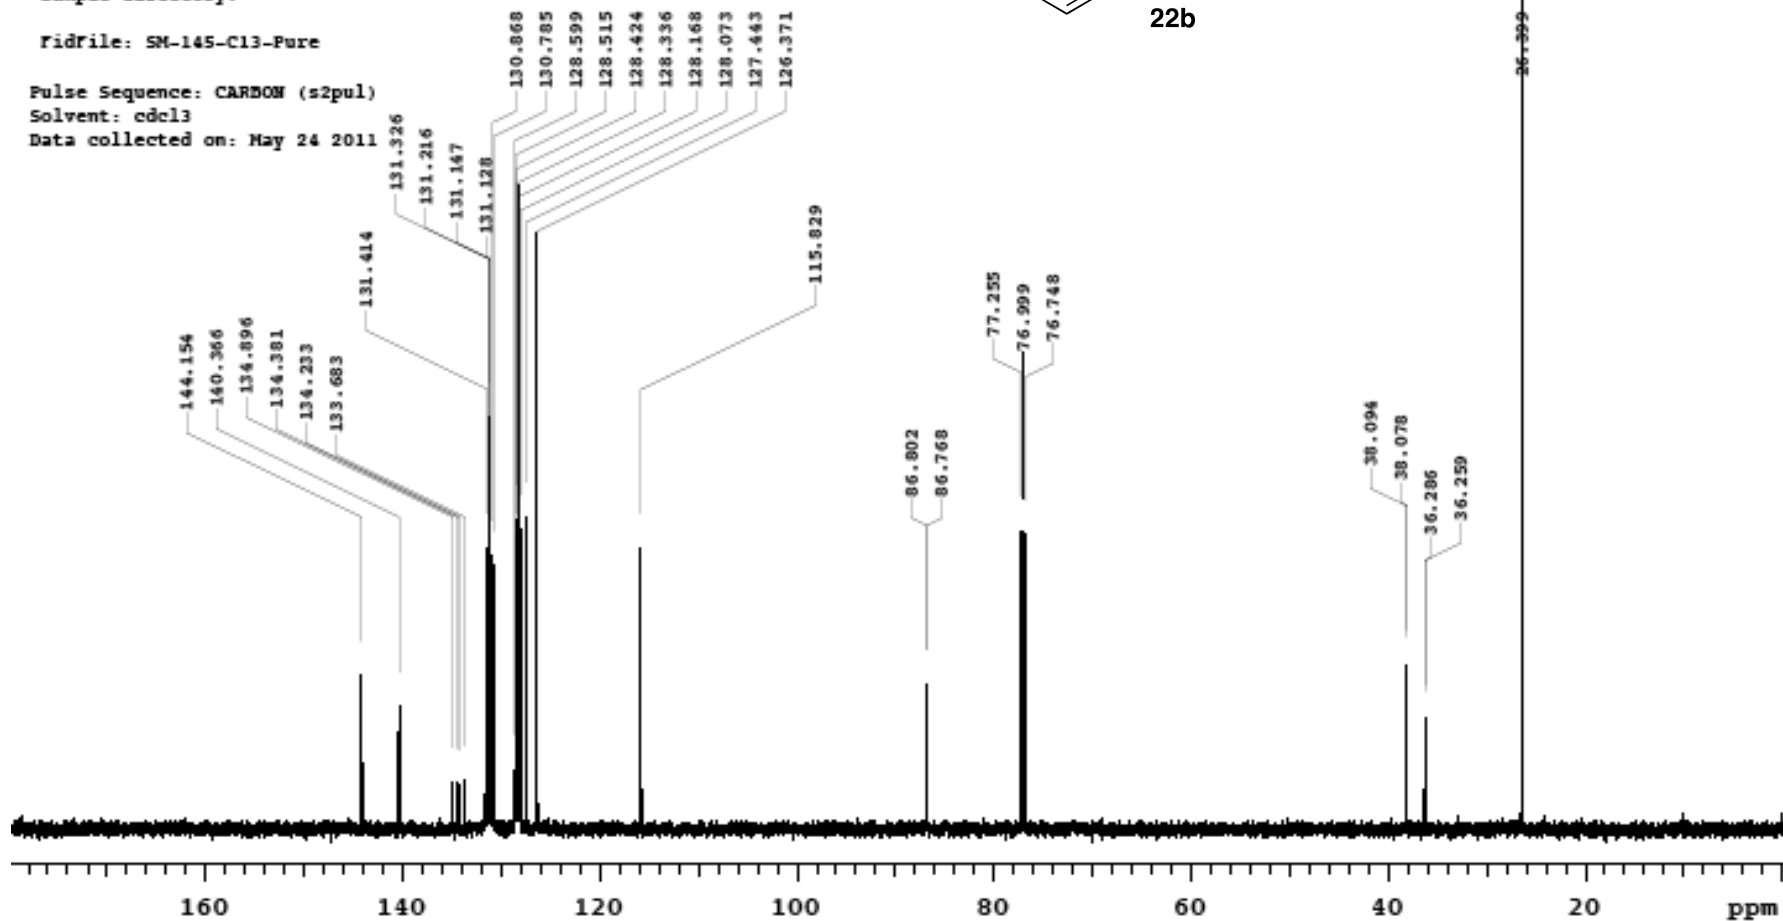

SM-96-1H

Sample Name:

Data Collected on:

Sm.Chem.LSA.UMich.edu-inova500

Archive directory:

Sample directory:

fidfile: SM-96-1H-Pure

Pulse Sequence: PROTON (s2pul)

Solvent: cdcl3

Data collected on: Mar 21 2011

Agilent Technologies

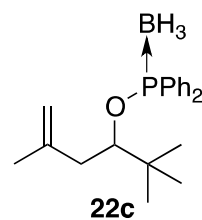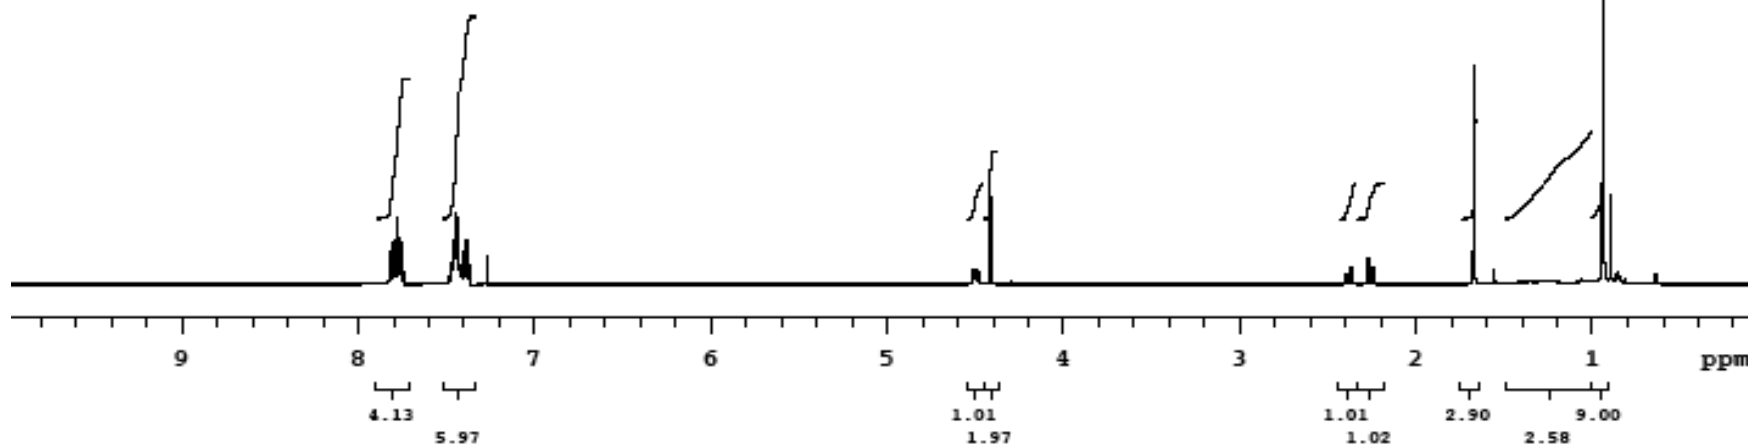

SM-96-C13-pure

Sample Name:

Data Collected on:

Sn.Chem.LSA.UMich.edu-inova500

Archive directory:

Sample directory:

Filename: SM-96-C13-pure

Pulse Sequence: CARBON (s2pul)

Solvent: cdcl3

Data collected on: Mar 21 2011

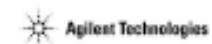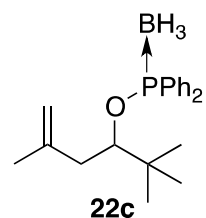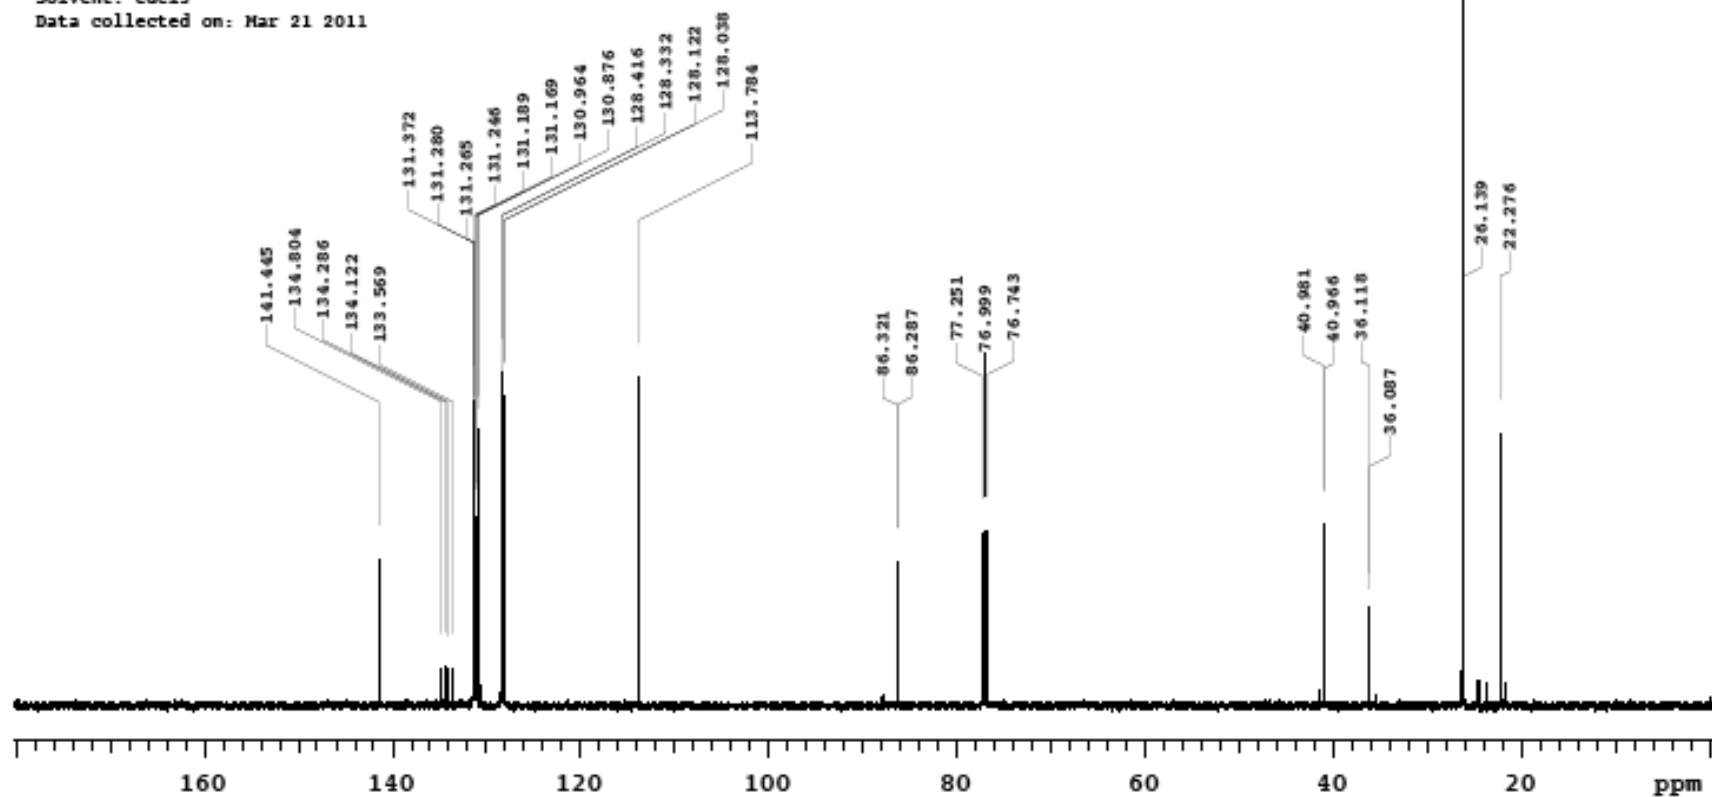

SM-106-1H-pure

Sample Name:

Data Collected on:

Sn.Chem.LSA.UMich.edu-inova500

Archive directory:

Sample directory:

File: SM-106-1H-pure

Pulse Sequence: PROTON (s2pul)

Solvent: cdcl3

Data collected on: Apr 9 2011

Agilent Technologies

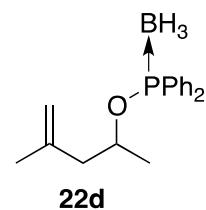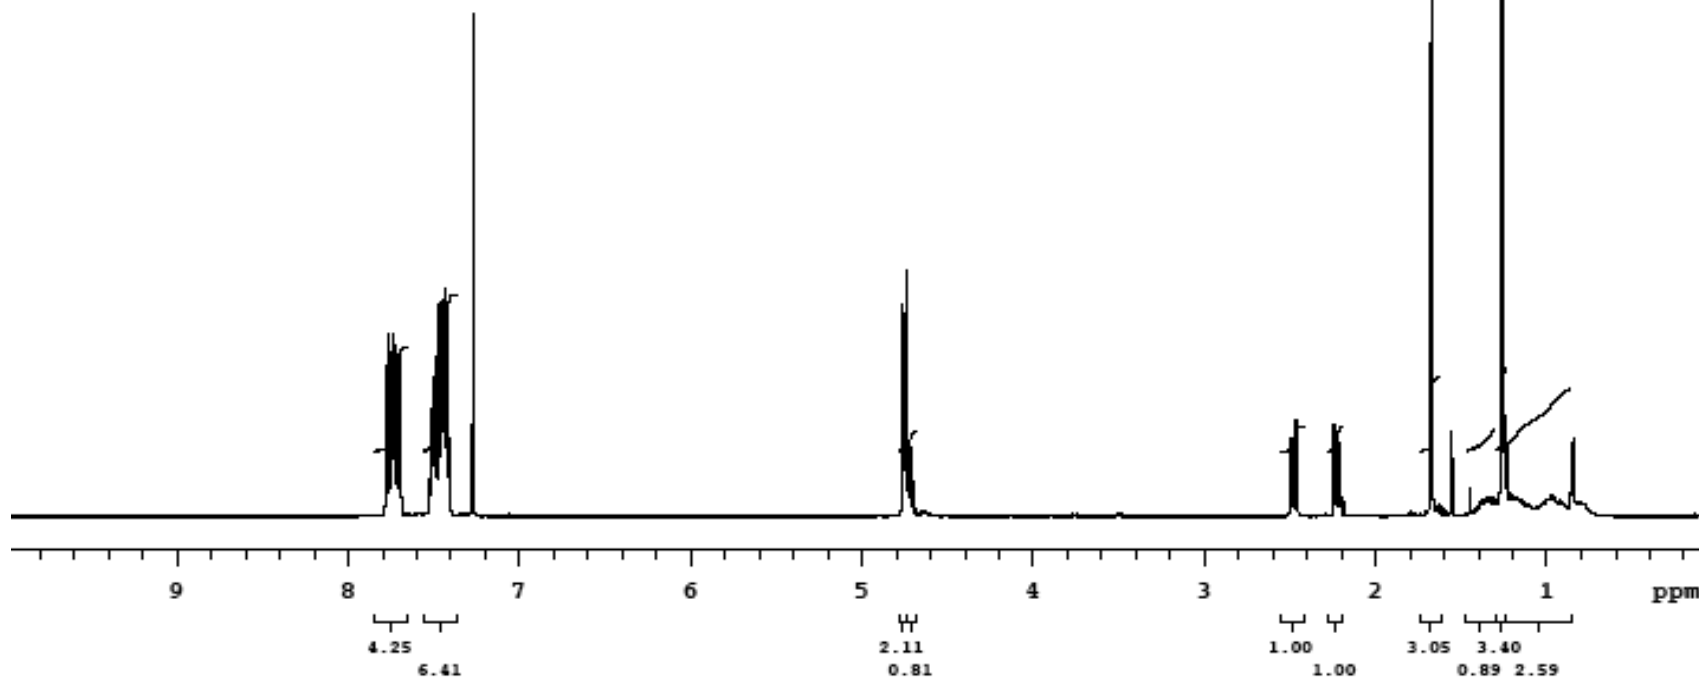

SM-106-C13-pure

Sample Name:

Data Collected on:

Sn.Chem.LSA.UMich.edu-inova500

Archive directory:

Sample directory:

fidfile: SM-106-C13-5h

Pulse Sequence: CARBON (s2pul)

Solvent: cdcl3

Data collected on: Apr 9 2011

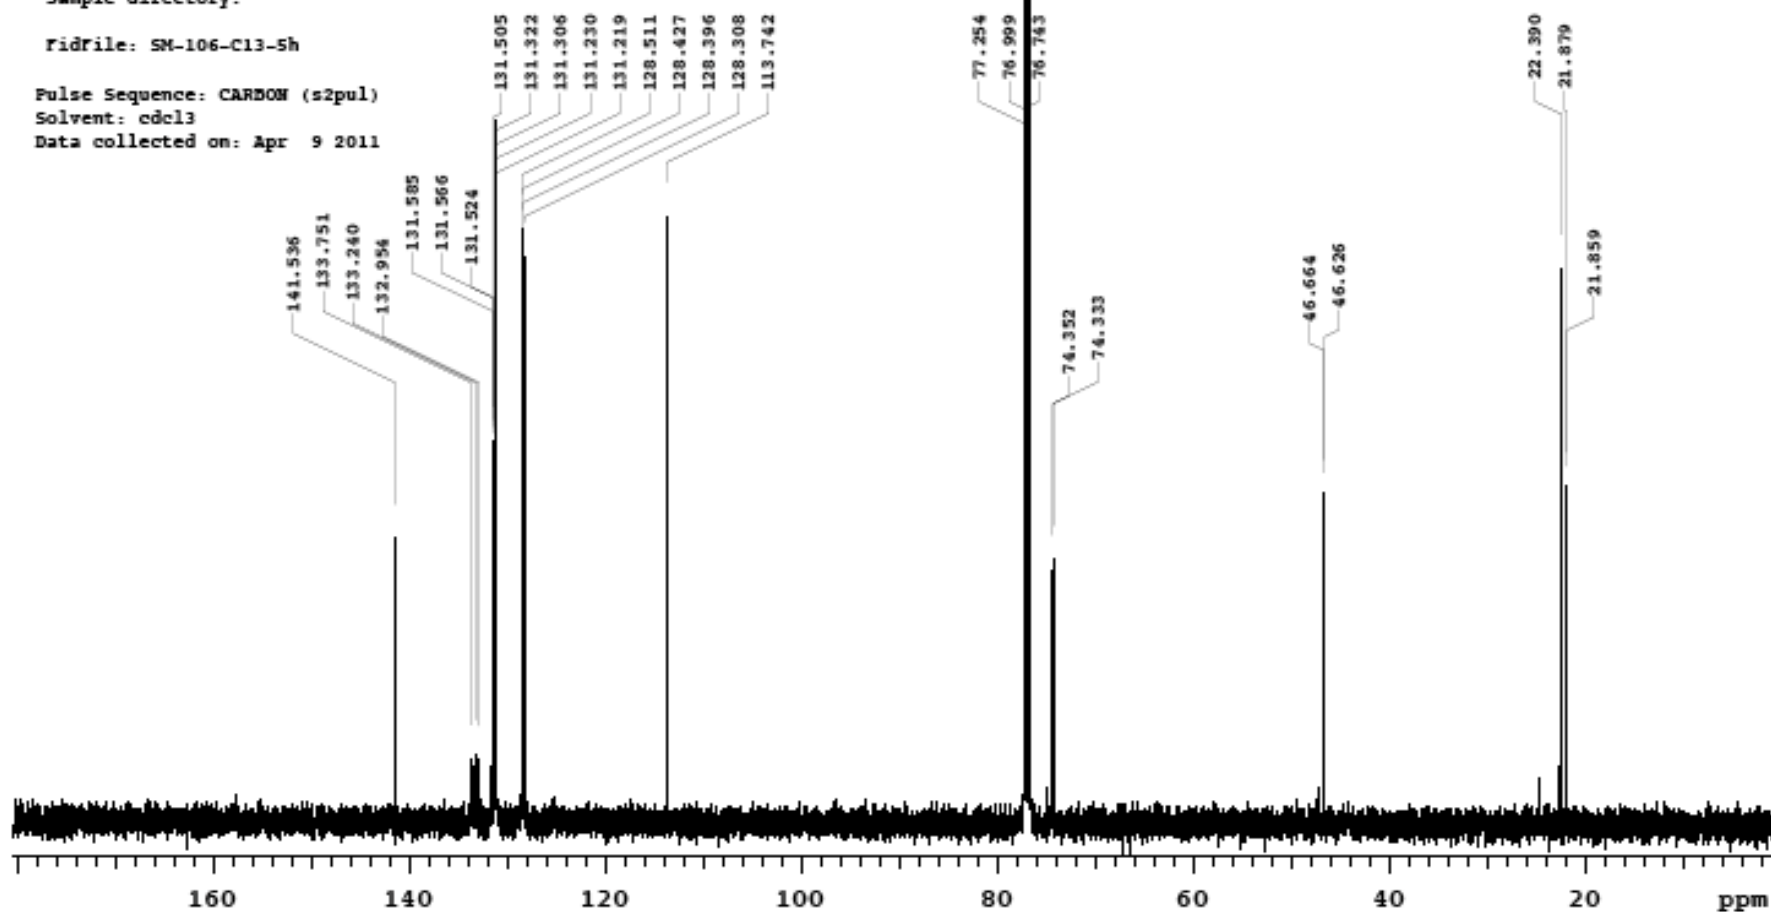

SM-86-1H

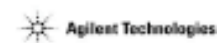

Sample Name:

Data Collected on:

Sn.Chem.LSA.UMich.edu-inova500

Archive directory:

Sample directory:

File: SM-86-1H

Pulse Sequence: PROTON (s2pul)

Solvent: cdcl3

Data collected on: Mar 2 2011

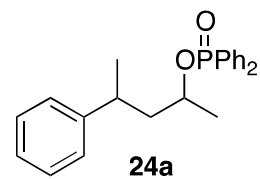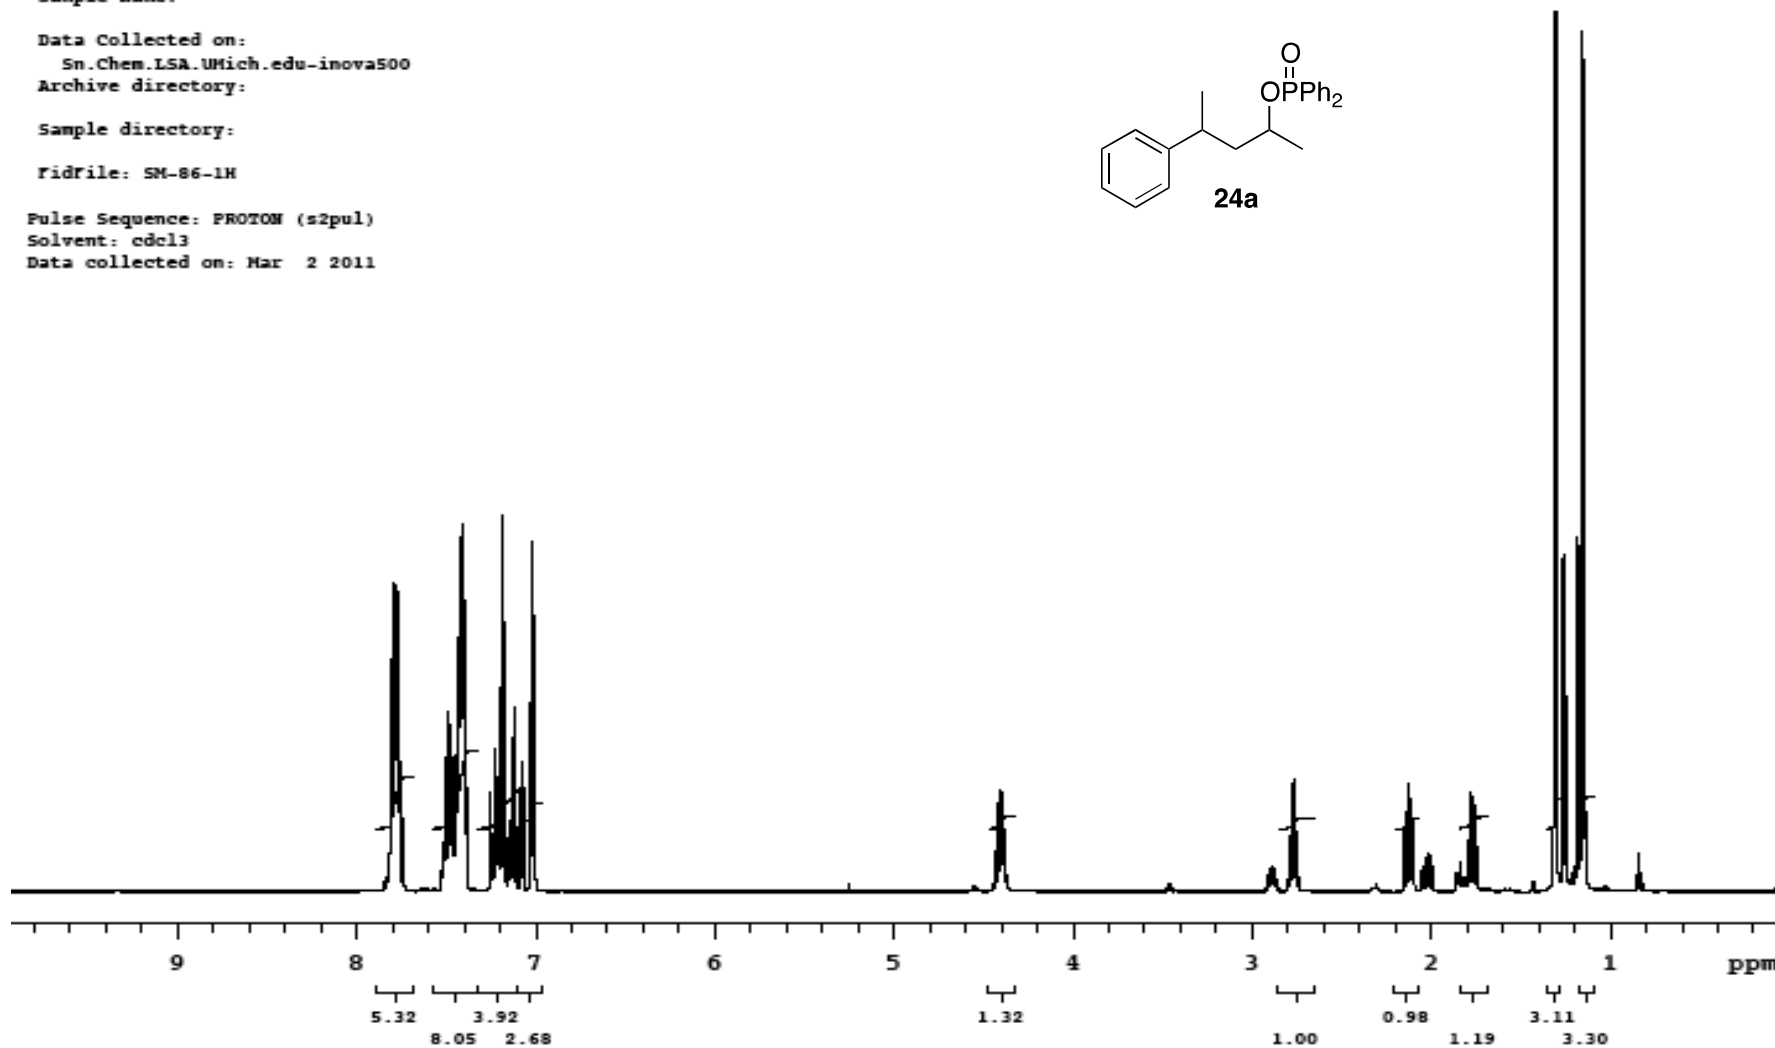

Data Collected on:  
Sn.Chem.LSA.UMich.edu-inova500  
Archive directory:

Sample directory:

FidFile: SM-86-Cl1

Pulse Sequence: CARBON

Solvent: cdcl3

Data collected on: Mar 3 2011

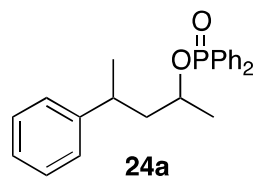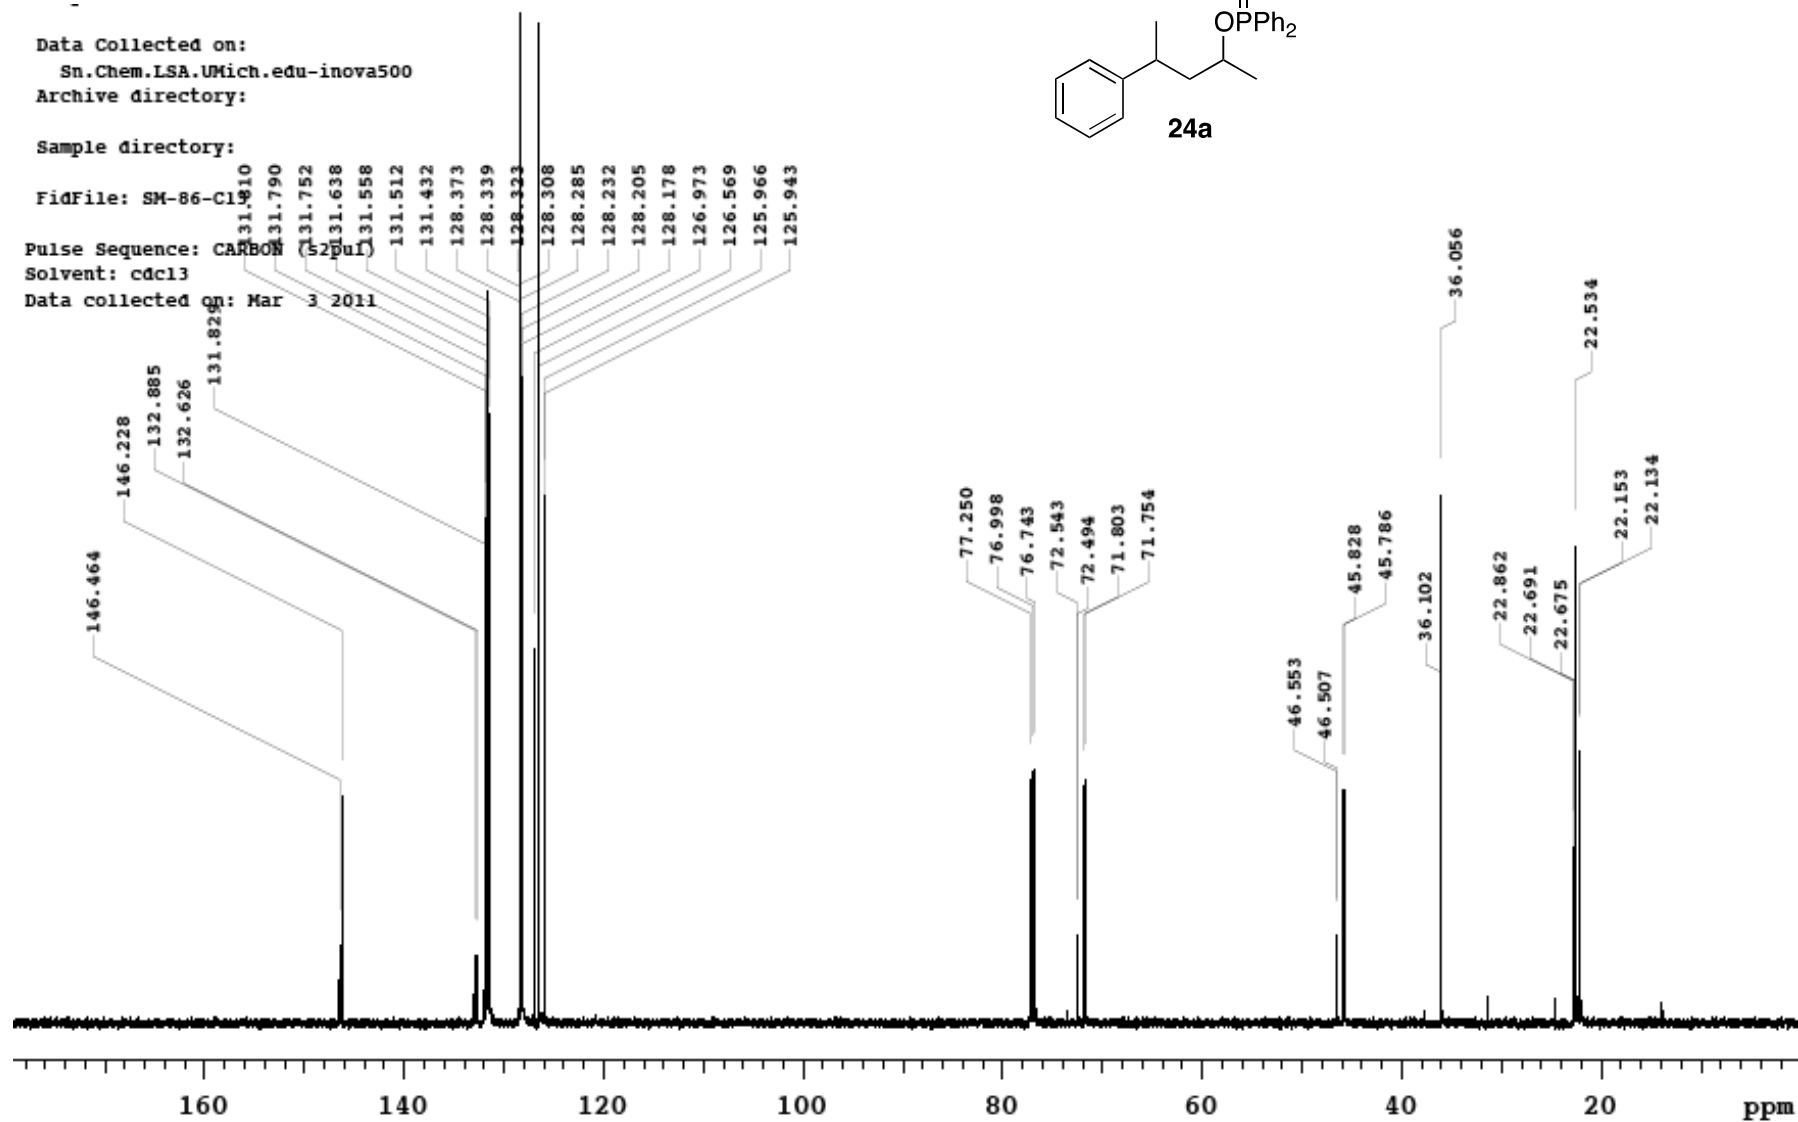

SM-147-1H-Upper-diastereomer-major

Sample Name:

Data Collected on:

Yb-vnmrs700

Archive directory:

Sample directory:

File: SM-147-1H-Upper-diastereomer-major

Pulse Sequence: PROTON (s2pul)

Solvent: cdcl3

Data collected on: Jun 11 2011

Agilent Technologies

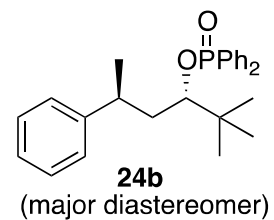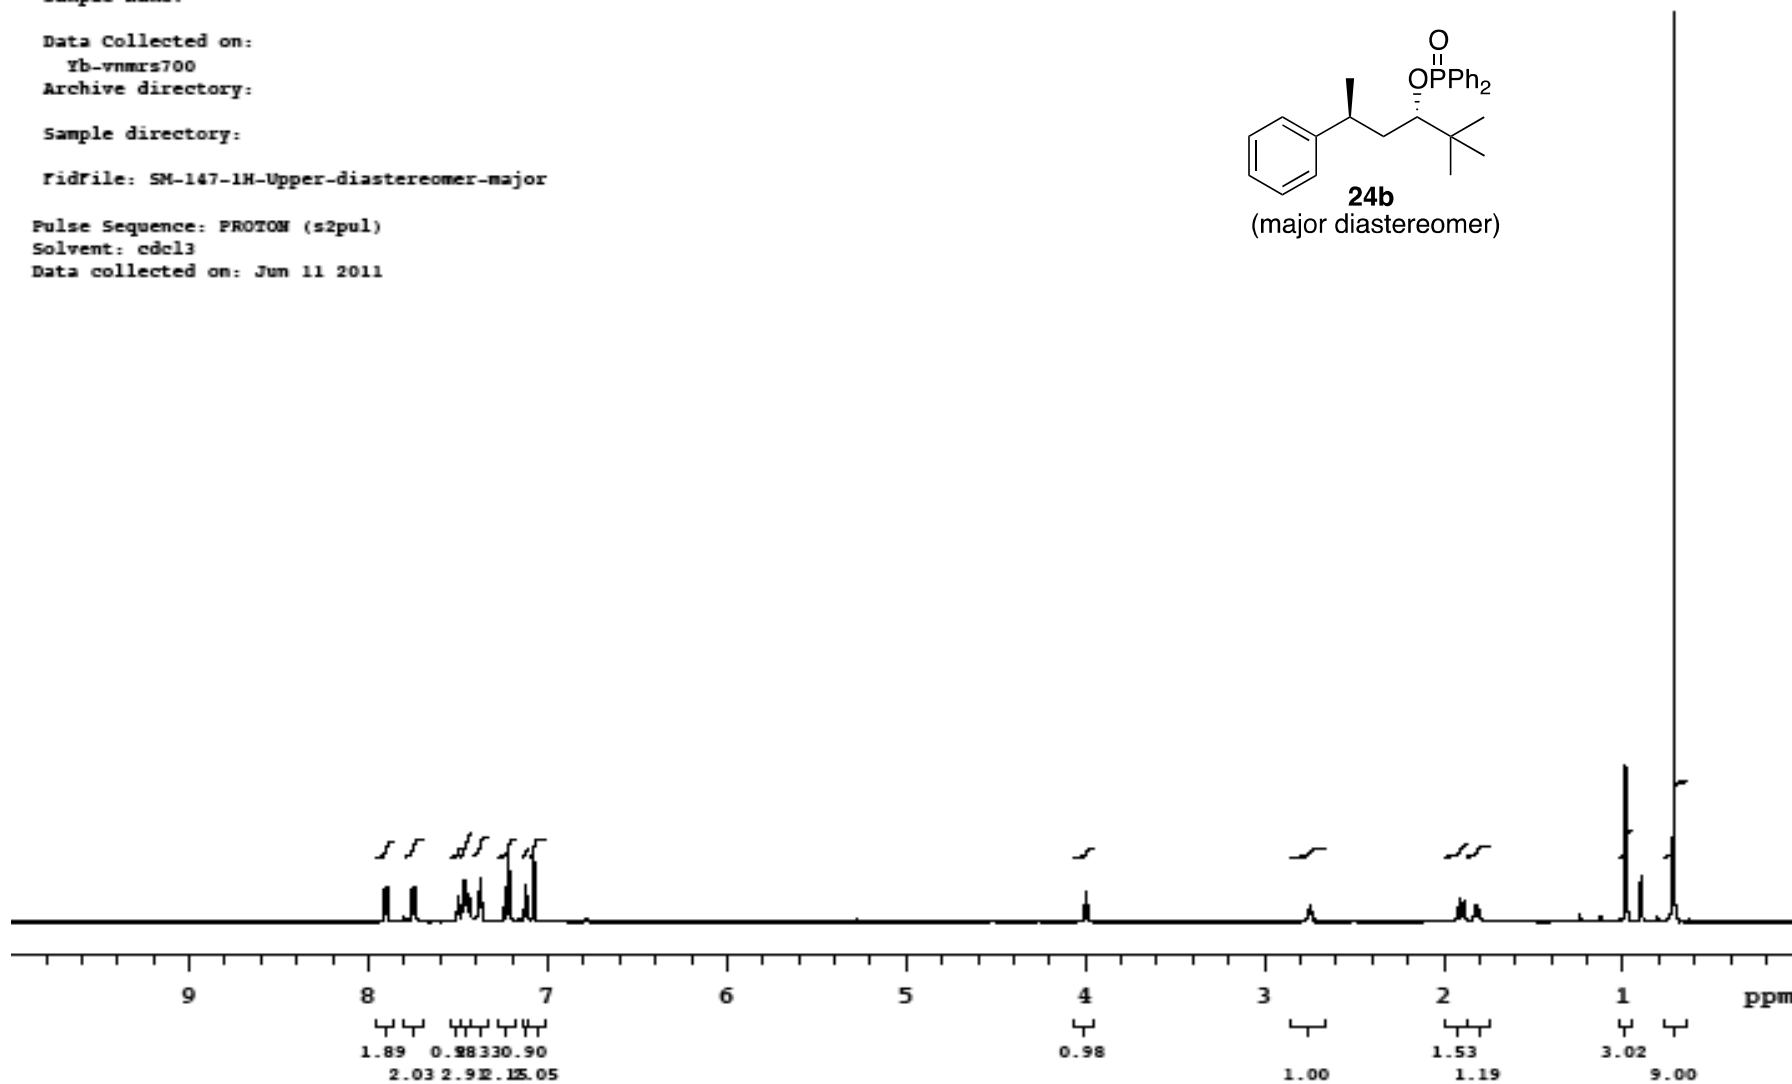



SM-147-C13-Upper-diastereomer-major

Sample Name:

Data Collected on:

Yb-vnmrs700

Archive directory:

Sample directory:

Filename: SM-147-C13-Upper-diastereomer-major

Pulse Sequence: CARBON (s2pul)

Solvent: cdcl3

Data collected on: Jun 11 2011

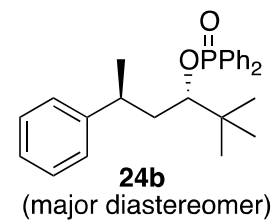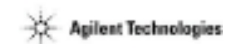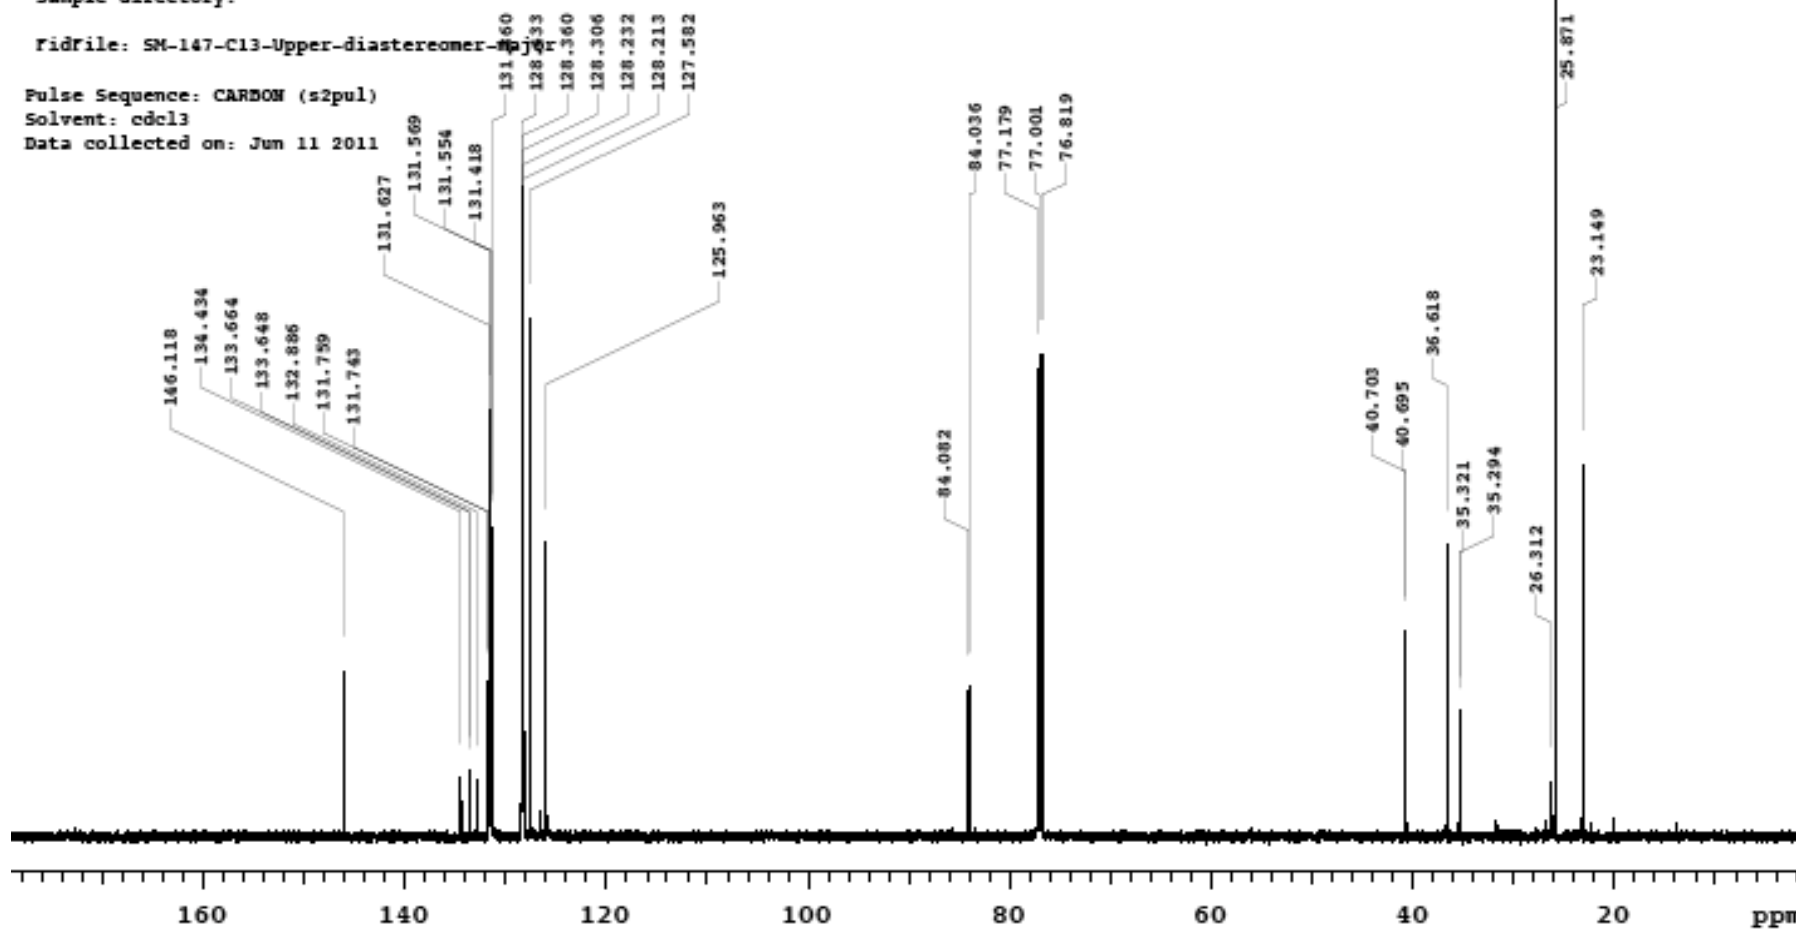

SM-147-1H-Lower-diastereomer-minor

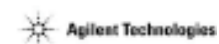

Sample Name:

Data Collected on:

Yb-vnmrs700

Archive directory:

Sample directory:

FidFile: SM-147-1H-Lower-diastereomer-minor

Pulse Sequence: PROTON (s2pul)

Solvent: cdcl3

Data collected on: Jun 11 2011

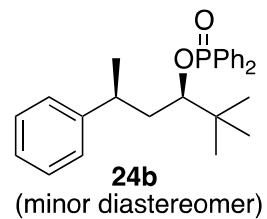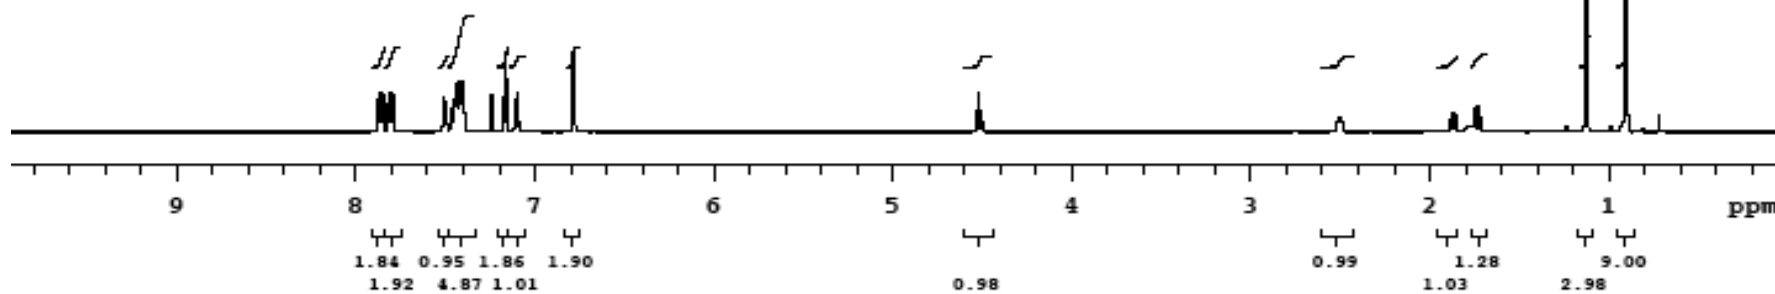

Sample Name:

Data Collected on:

Yb-vnmrs700

Archive directory:

Sample directory:

File: SM-147-C13-Lower-diastereomer-minor

Pulse Sequence: CARBON (s2pul)

Solvent: cdcl3

Data collected on: Jun 11 2011

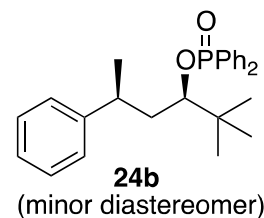

Agilent Technologies

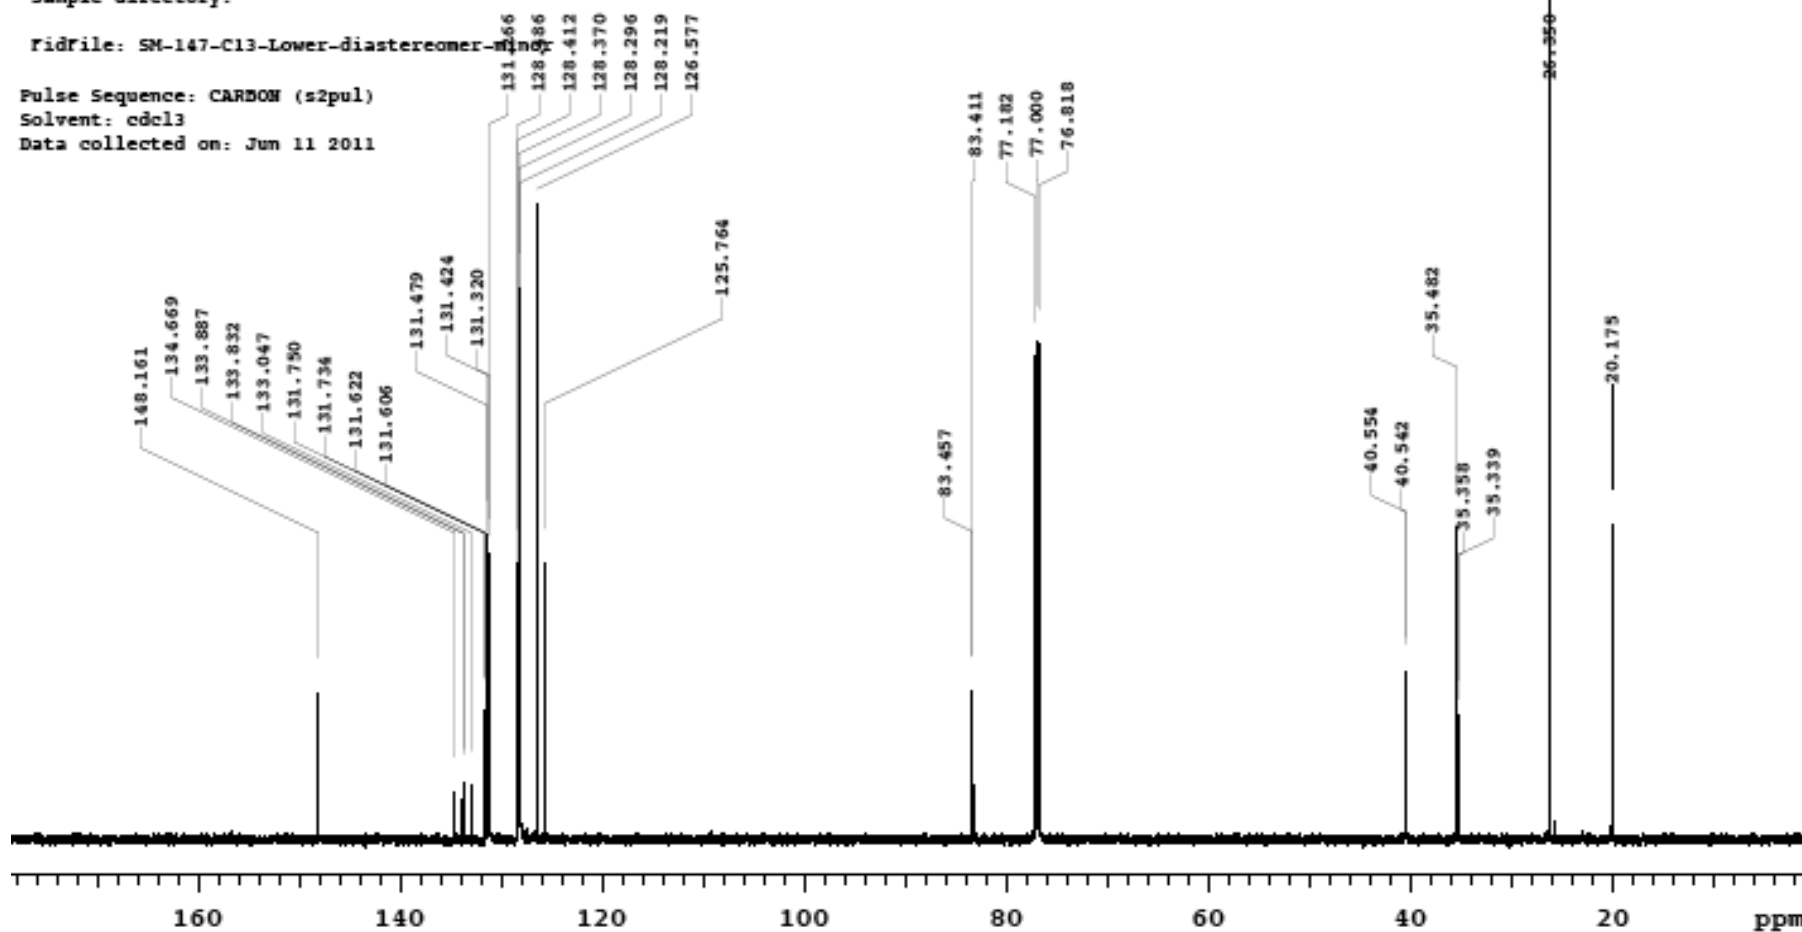

Sample Name:

Data Collected on:

Sn.Chem.LSA.UMich.edu-inova500

Archive directory:

Sample directory:

File: SM-98-1H-pure

Pulse Sequence: PROTON (s2pul)

Solvent: cdcl3

Data collected on: Mar 18 2011

Agilent technologies

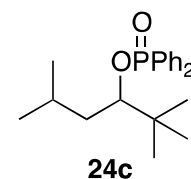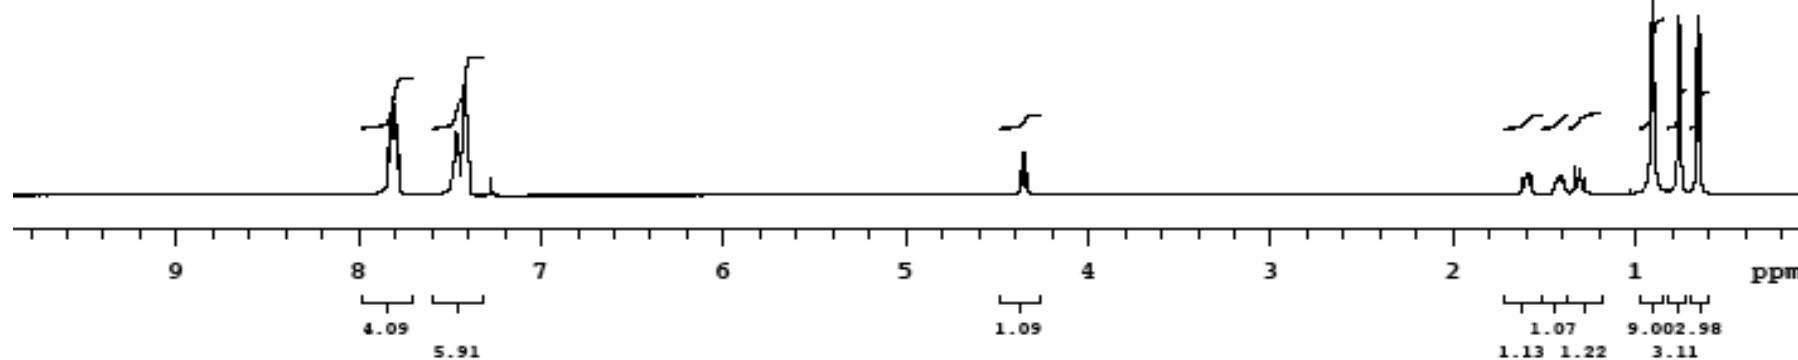

SM-98-C13-pure

Sample Name:

Data Collected on:

Sn.Chem.LSA.UMich.edu-inova500

Archive directory:

Sample directory:

fidfile: SM-98-C13-pure

Pulse Sequence: CARBON (s2pul)

Solvent: cdcl3

Data collected on: Mar 19 2011

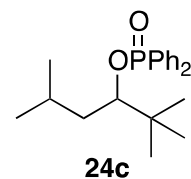

Agilent Technologies

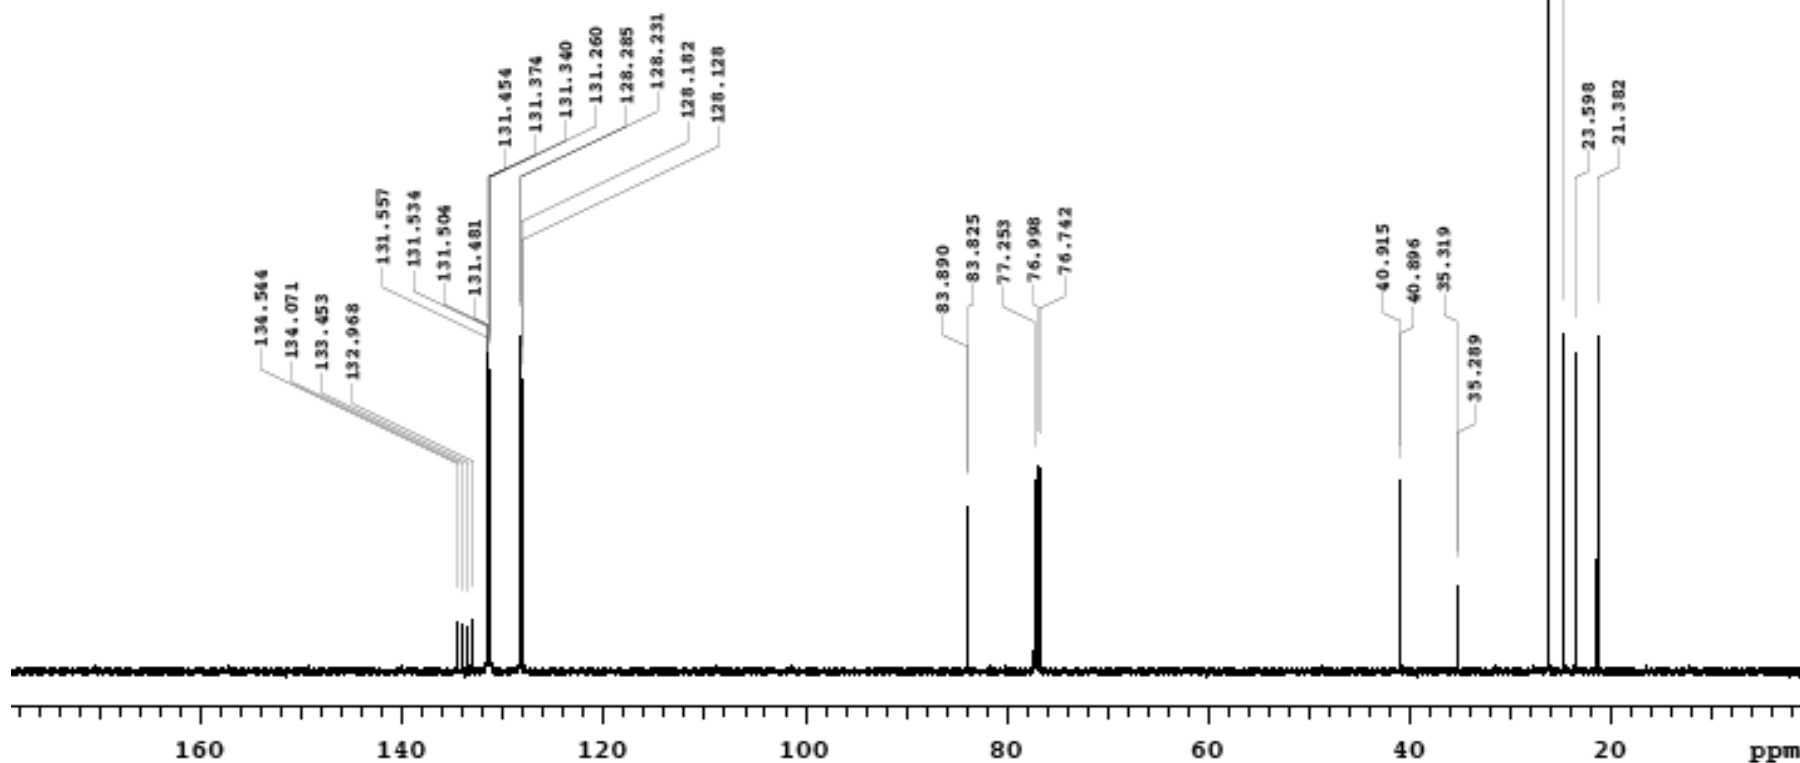

SM-94-1H-Lowerspot

Sample Name:

Data Collected on:

Sn.Chem.LSA.UMich.edu-inova500

Archive directory:

Sample directory:

Fidfile: SM-94-1H-Lowerspot-clean-NMR

Pulse Sequence: PROTON (s2pul)

Solvent: cdcl3

Data collected on: Mar 10 2011

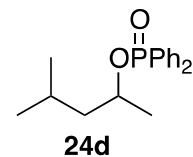

Agilent Technologies

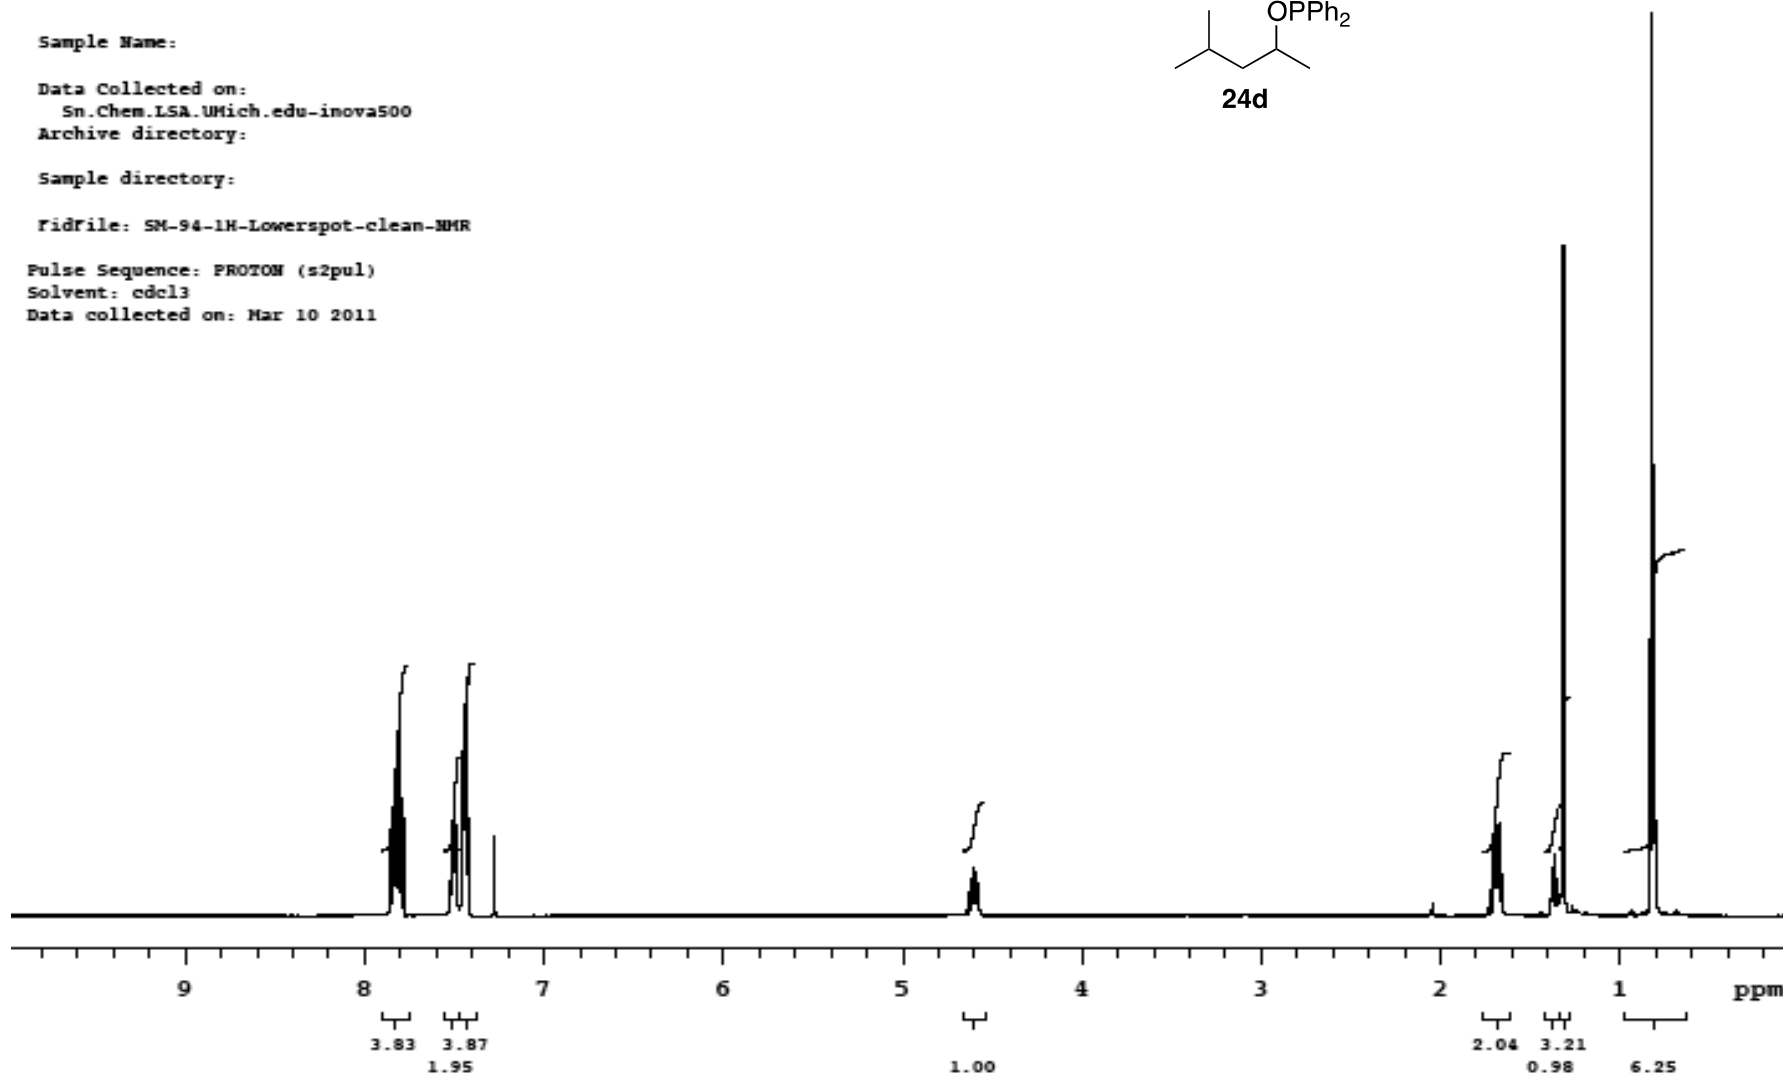

Sample Name:

Data Collected on:

Sn.Chem.LSA.UMich.edu-inova500

Archive directory:

Sample directory:

File: SM-94-C13-lowerspot

Pulse Sequence: CARBON (s2pul)

Solvent: cdcl3

Data collected on: Mar 9 2011

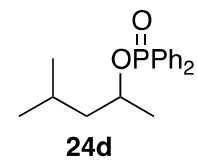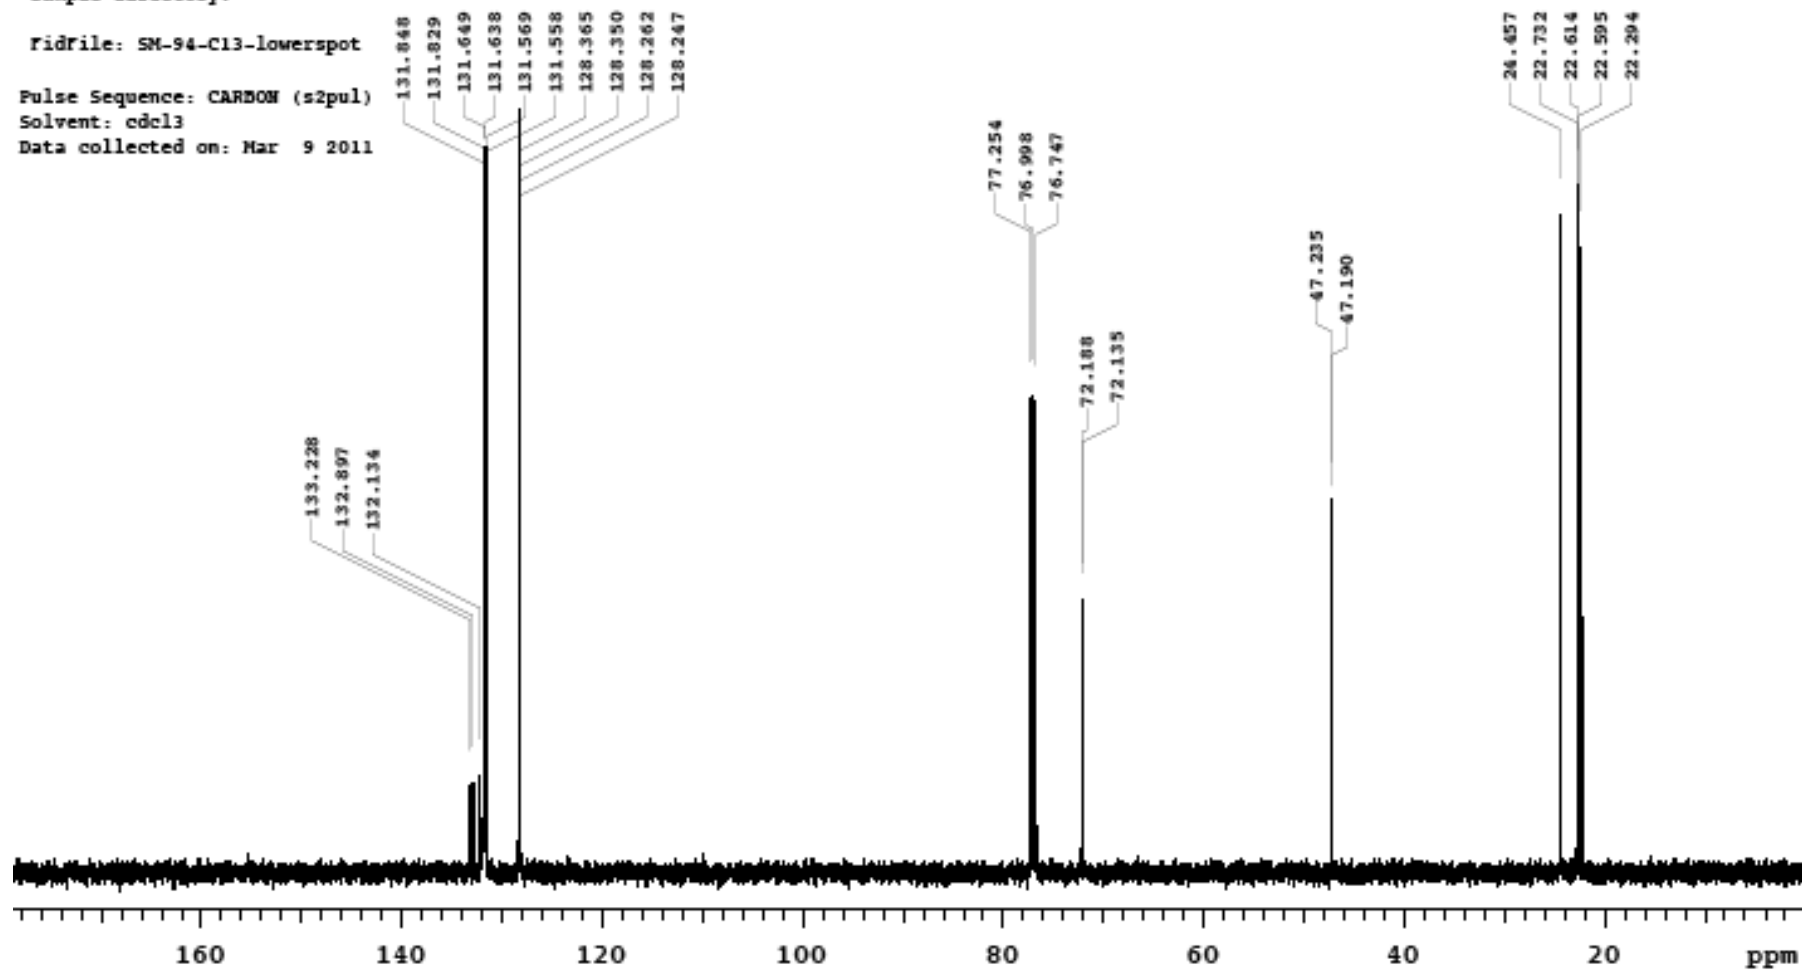

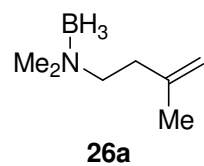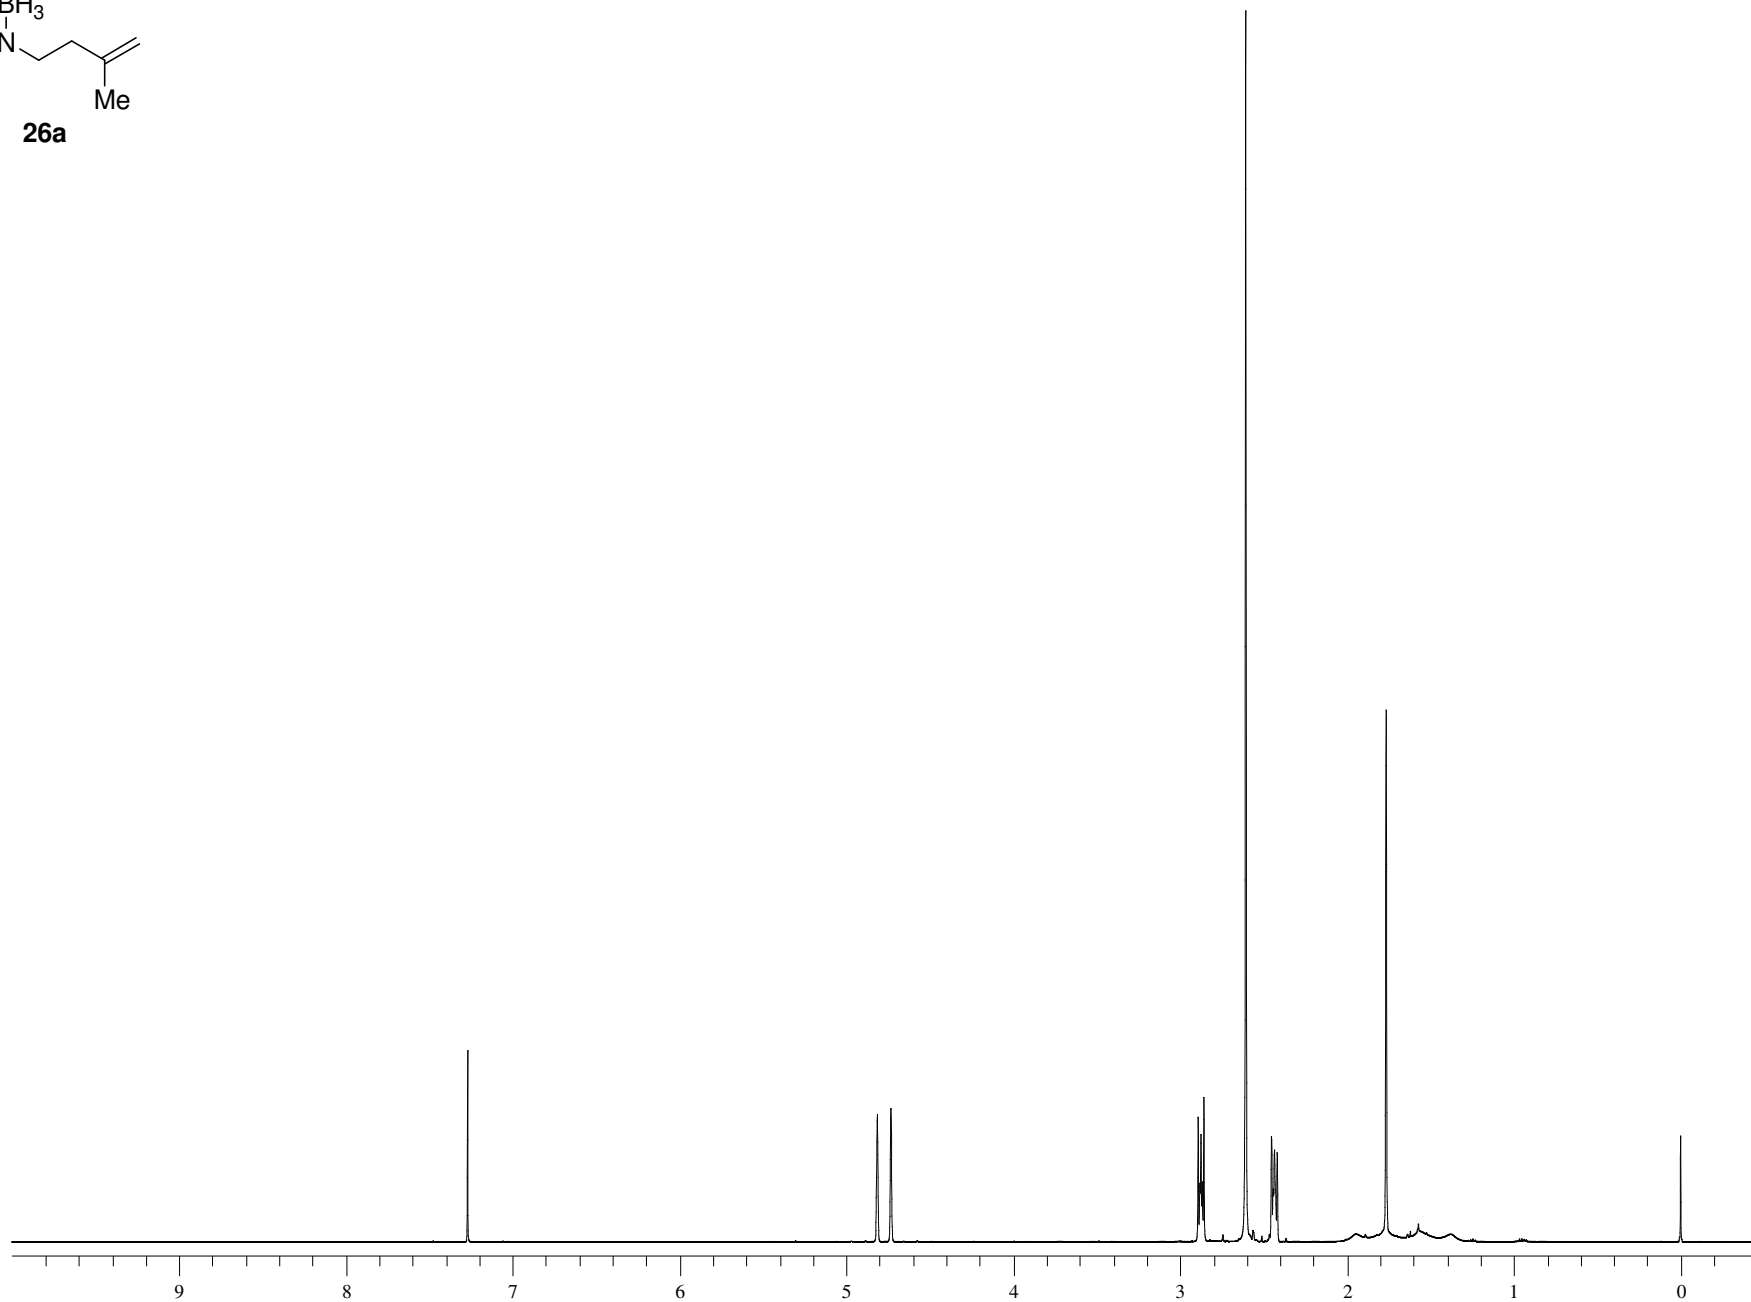



File: tdvVI-173p-C

Pulse Sequence: s2pul

Solvent: cdcl3

Ambient temperature

Operator: tdevries

File: tdvVI-173p-C

INNOVA-400 "Kr.chem.lsa.umich.edu"

Relax. delay 0.100 sec

Pulse 45.0 degrees

Acq. time 1.300 sec

Width 24140.0 Hz

64 repetitions

OBSERVE C13, 100.5712654 MHz

DECOUPLE H1, 399.9669644 MHz

Power 39 dB

continuously on

WALTZ-16 modulated

DATA PROCESSING

Line broadening 0.8 Hz

FT size 65536

Total time 1 min, 30 sec

Acquisition date: Oct 16 2007

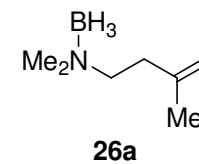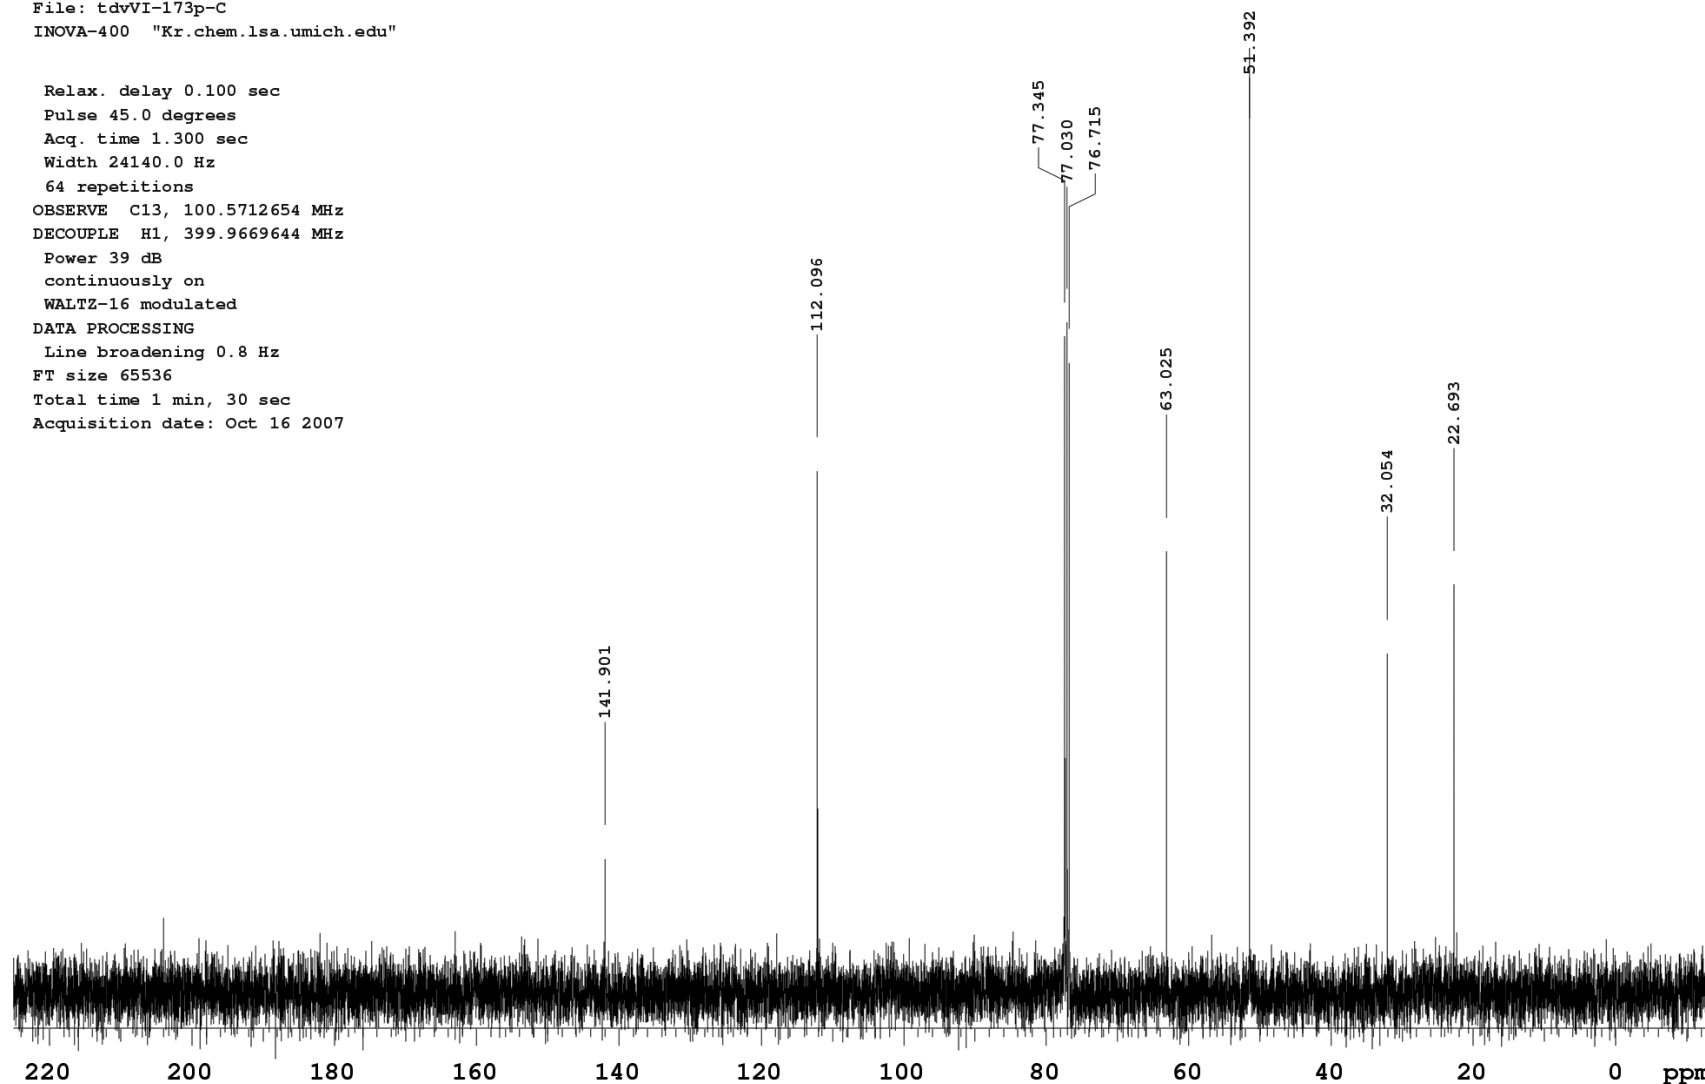

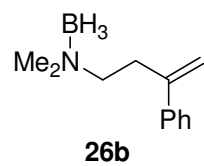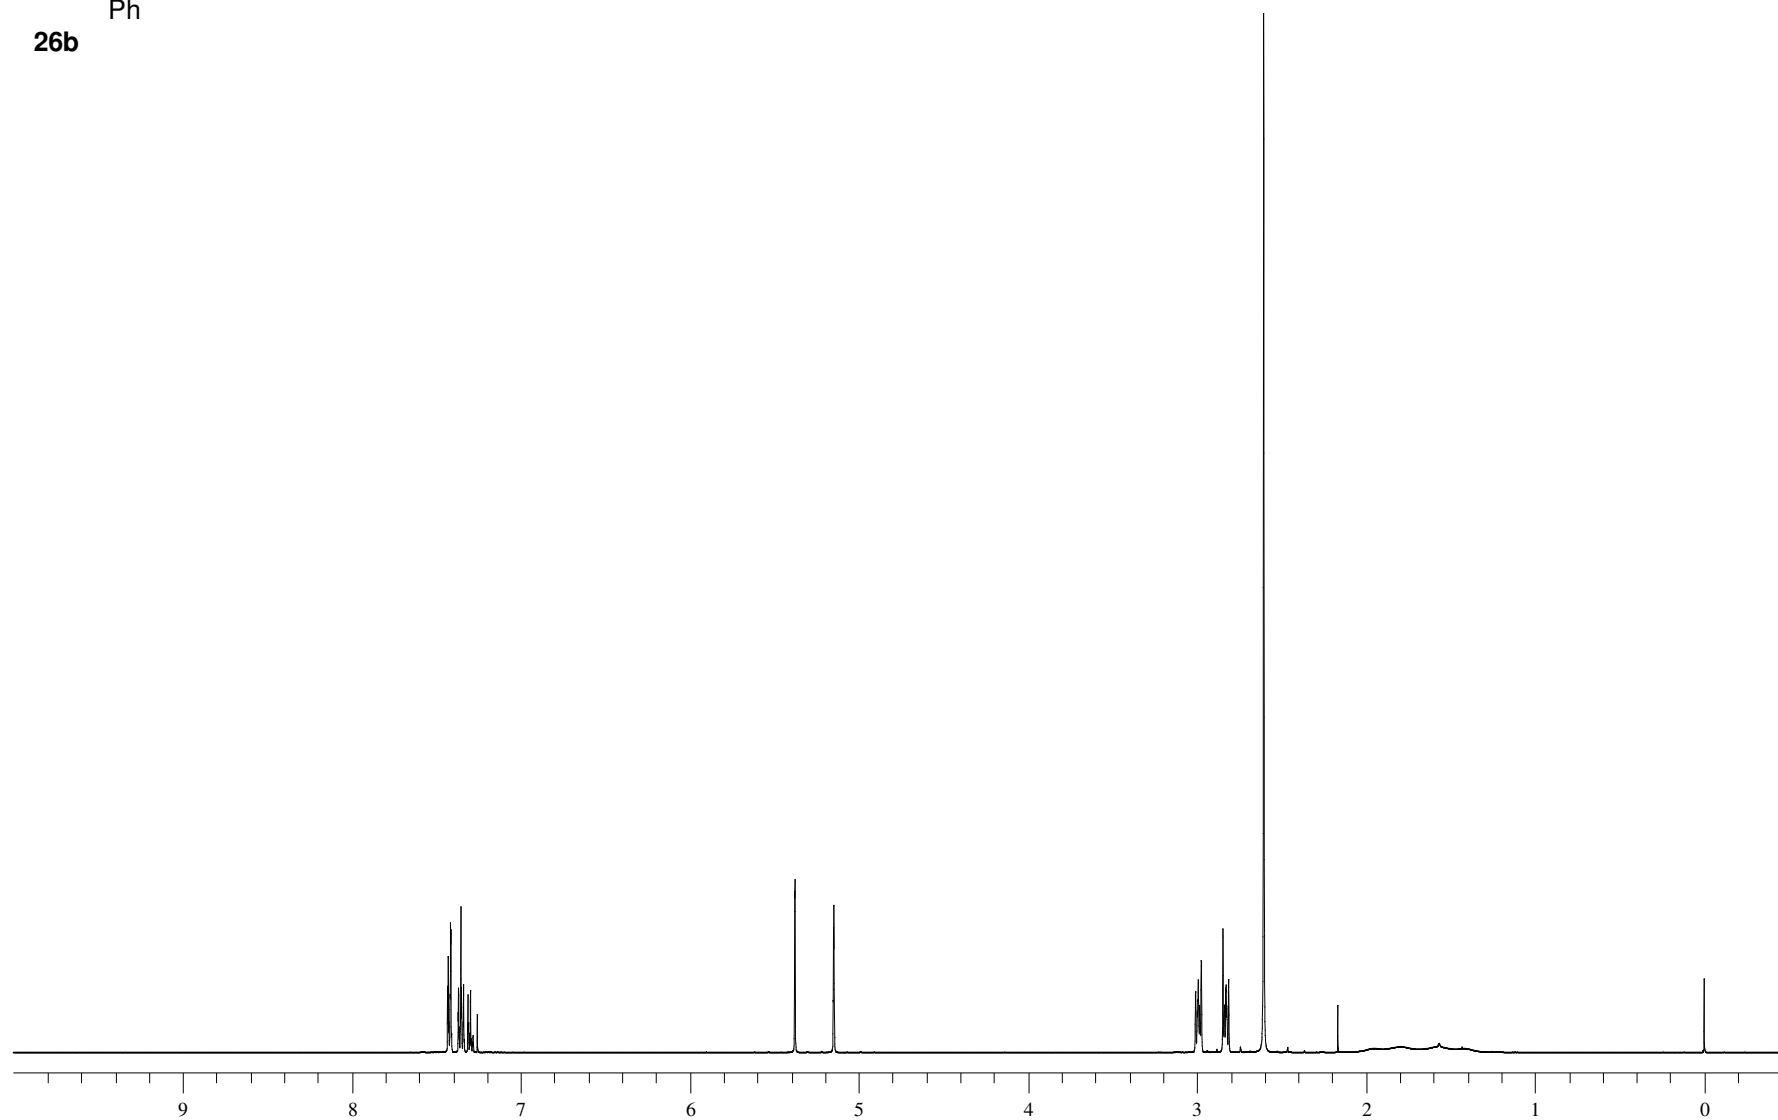

File: AMSI-134-C

Pulse Sequence: s2pul

Solvent: cdcl3

Ambient temperature

Operator: tdevries

File: AMSI-134-C

INOVA-400 "Kr.chem.lsa.umich.edu"

Relax. delay 0.100 sec  
Pulse 45.0 degrees  
Acq. time 1.300 sec  
Width 24140.0 Hz  
128 repetitions  
OBSERVE C13, 100.5712626 MHz  
DECOUPLE H1, 399.9669644 MHz  
Power 39 dB  
continuously on  
WALTZ-16 modulated  
DATA PROCESSING  
Line broadening 0.8 Hz  
FT size 65536  
Total time 3 min, 0 sec  
Acquisition date: Oct 16 2007

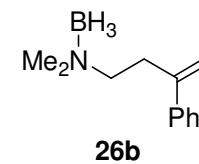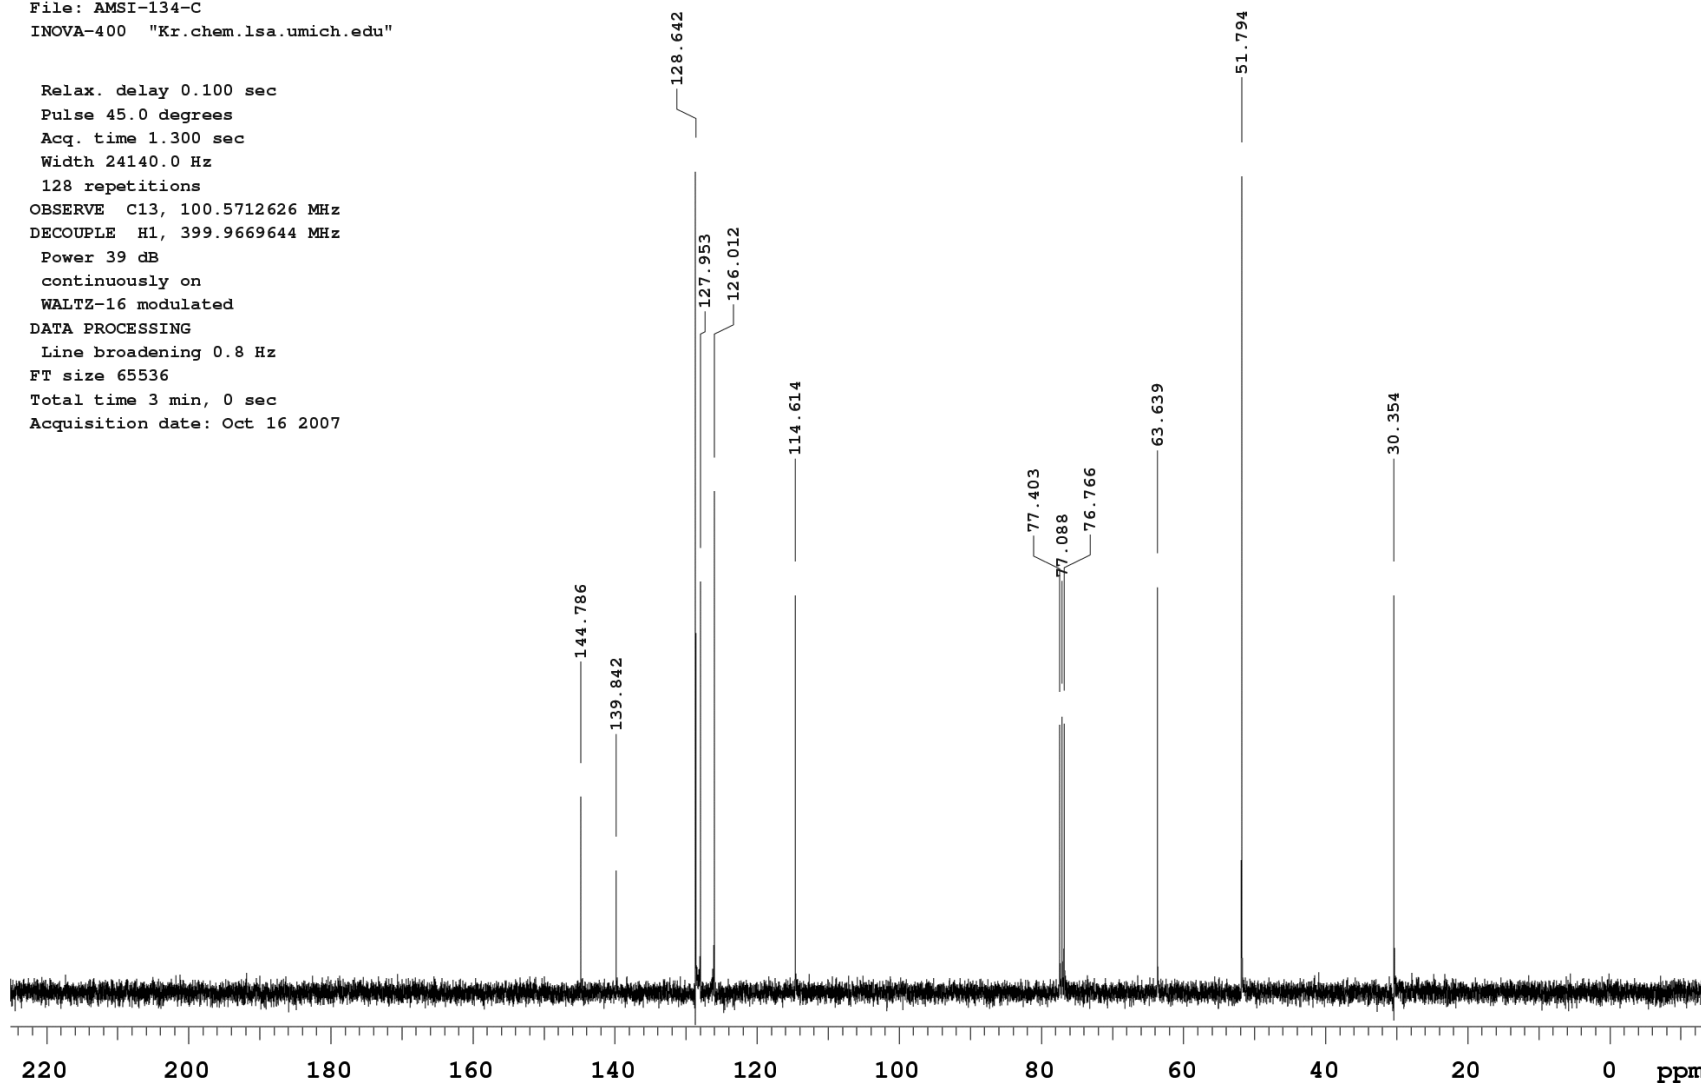

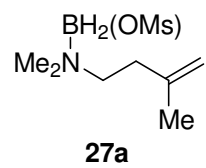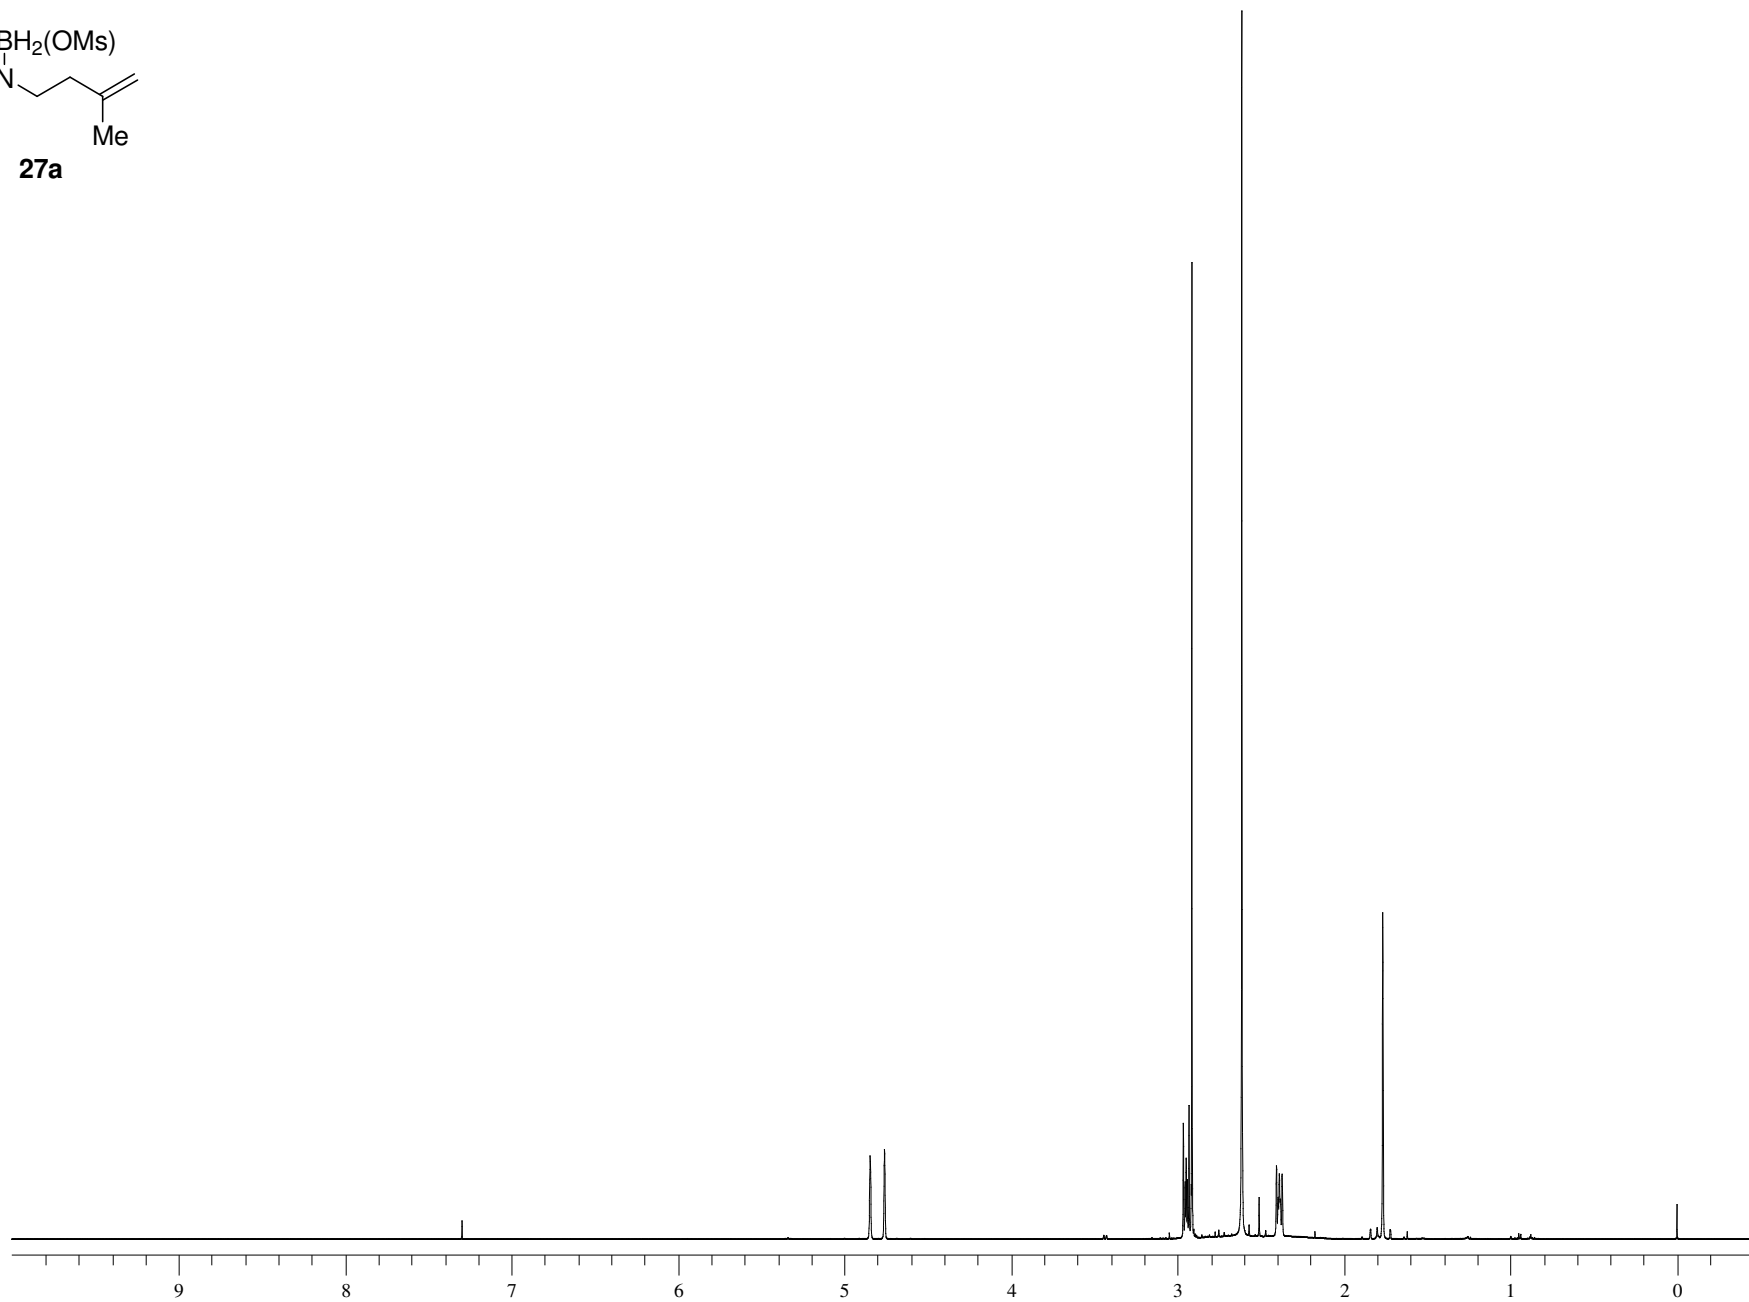

S-60

tdvVI-177a-C

File: tdvVI-177a-C

Pulse Sequence: s2pul

Solvent: cdcl3

Ambient temperature

Operator: tdevries

File: tdvVI-177a-C

INOVA-400 "Kr.chem.lsa.umich.edu"

Relax. delay 0.100 sec  
Pulse 45.0 degrees  
Acq. time 1.300 sec  
Width 24140.0 Hz  
64 repetitions  
OBSERVE C13, 100.5712626 MHz  
DECOUPLE H1, 399.9669644 MHz  
Power 39 dB  
continuously on  
WALTZ-16 modulated  
DATA PROCESSING  
Line broadening 0.8 Hz  
FT size 65536  
Total time 1 min, 30 sec  
Acquisition date: Oct 16 2007

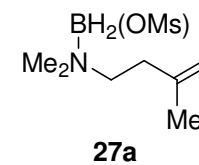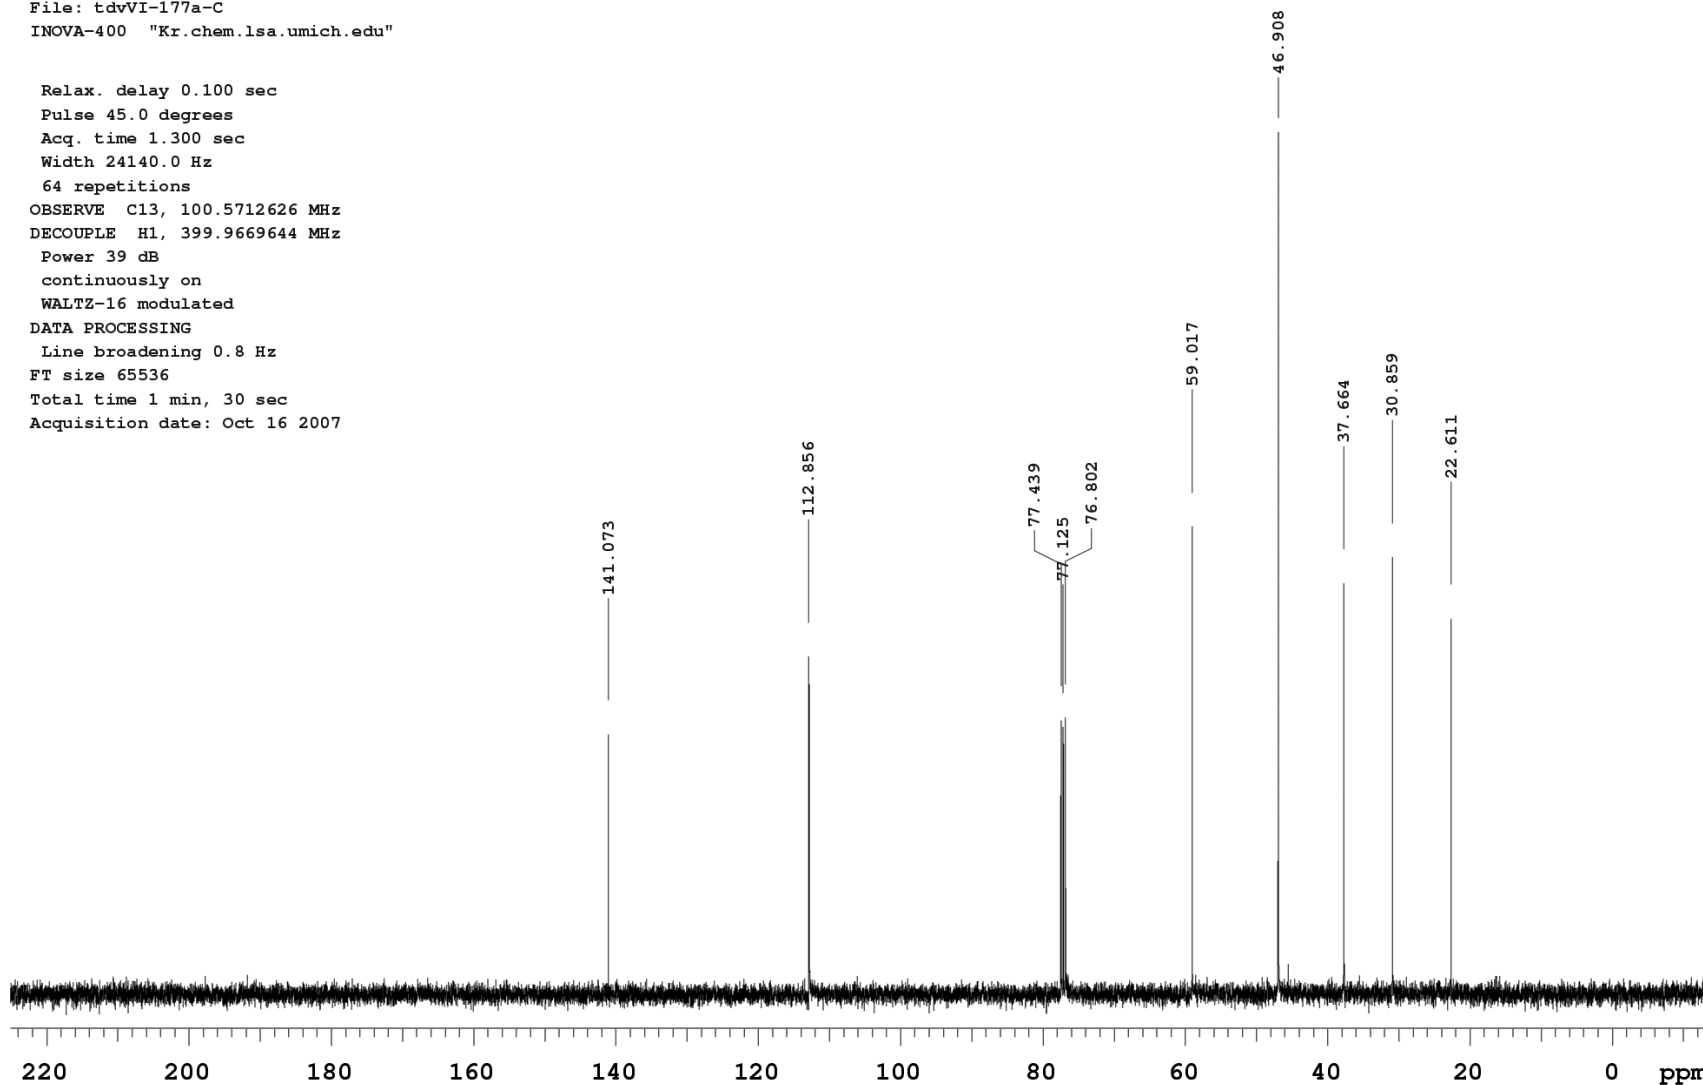

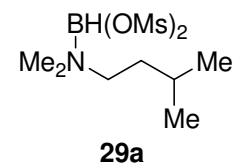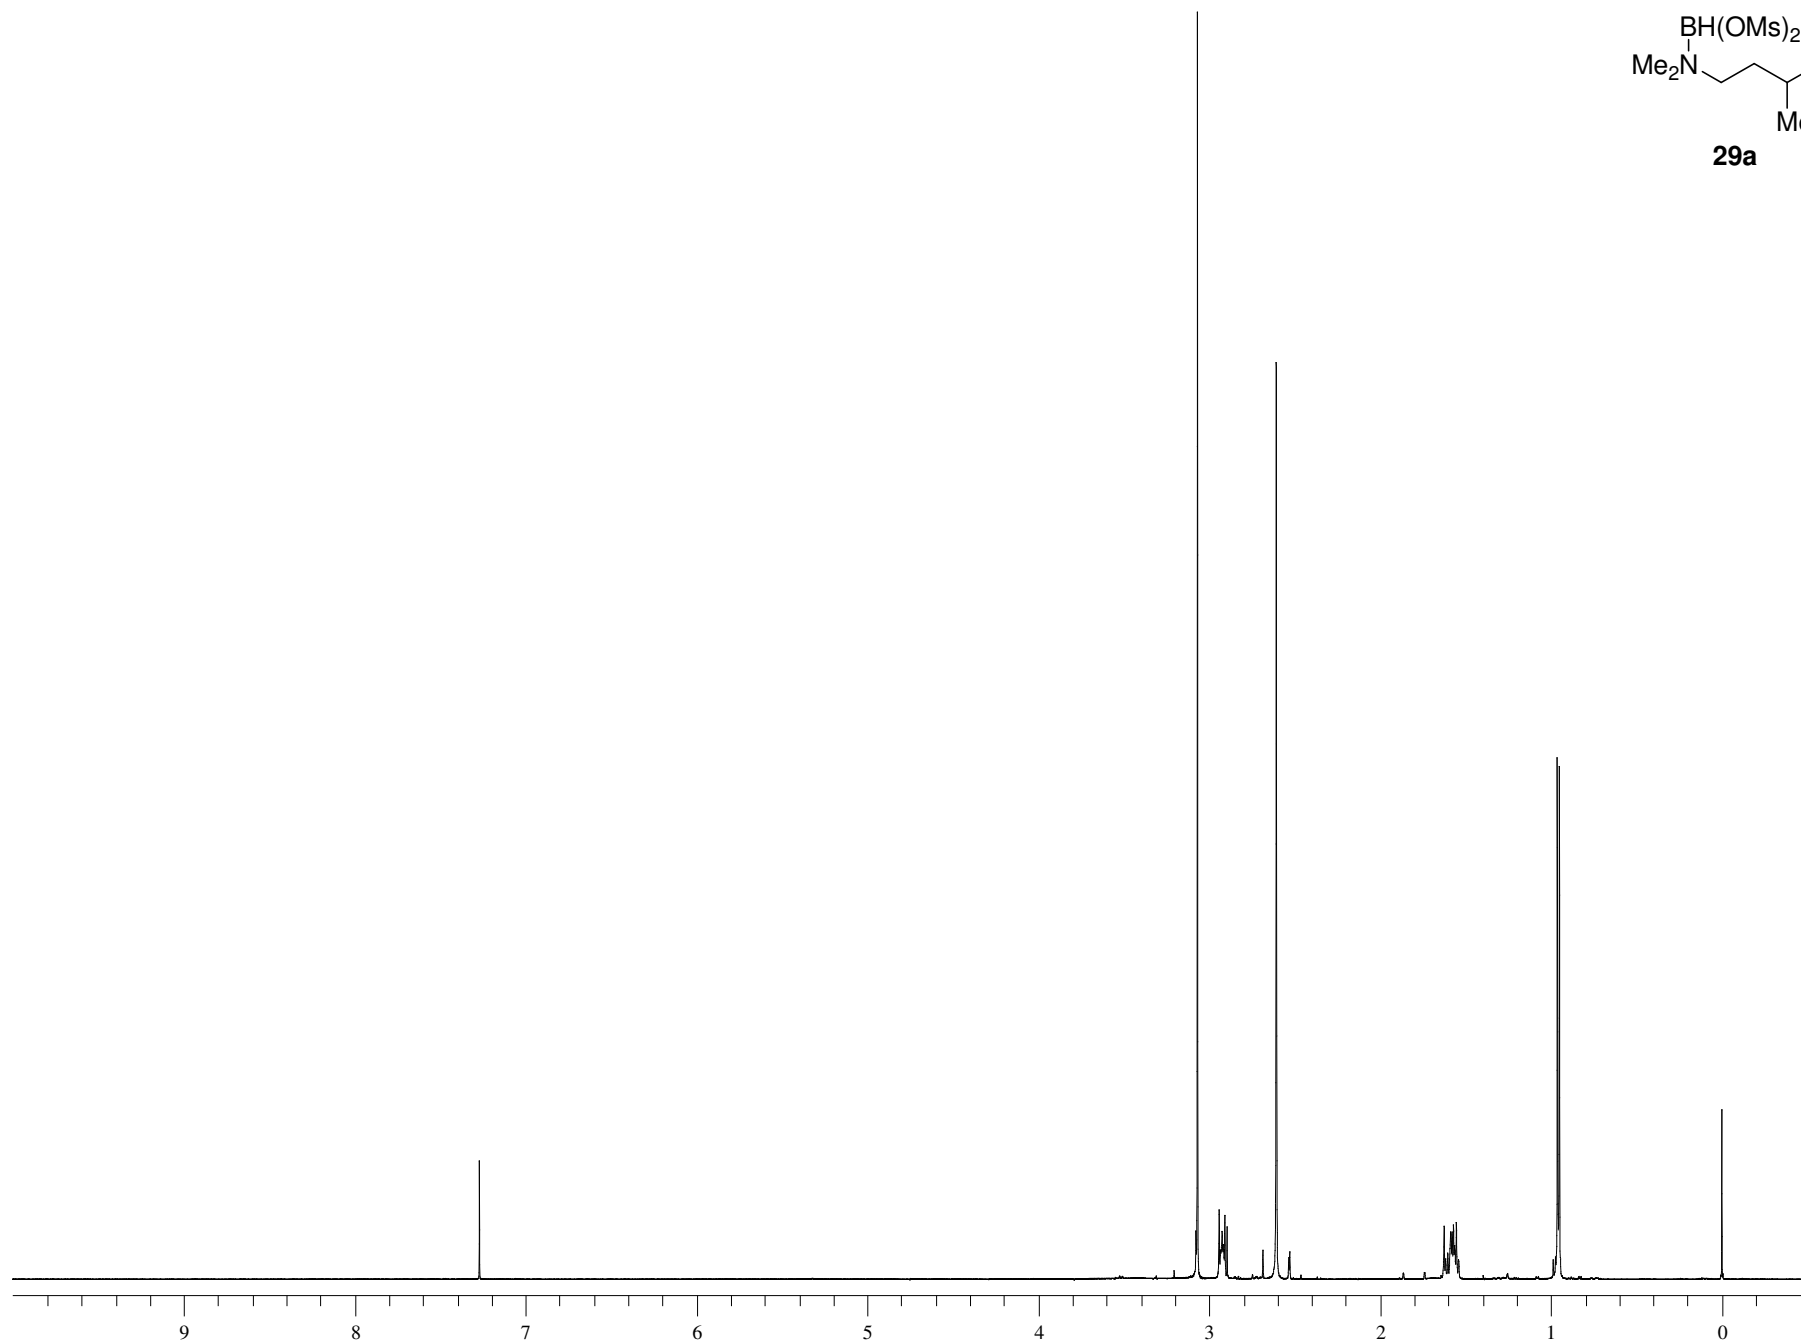

tdvVI-187-14-C

File: Carbon

Pulse Sequence: s2pul

Solvent: cdcl3

Ambient temperature

Operator: tdevries

INOVA-400 "Zr.Chem.LSA.UMich.Edu"

Relax. delay 0.100 sec

Pulse 45.0 degrees

Acq. time 1.300 sec

Width 24140.0 Hz

96 repetitions

OBSERVE C13, 100.5712653 MHz

DECOUPLE H1, 399.9669644 MHz

Power 39 dB

continuously on

WALTZ-16 modulated

DATA PROCESSING

Line broadening 0.8 Hz

FT size 65536

Total time 2 min, 15 sec

Acquisition date: Nov 10 2007

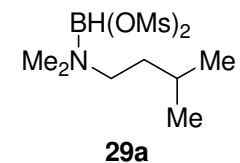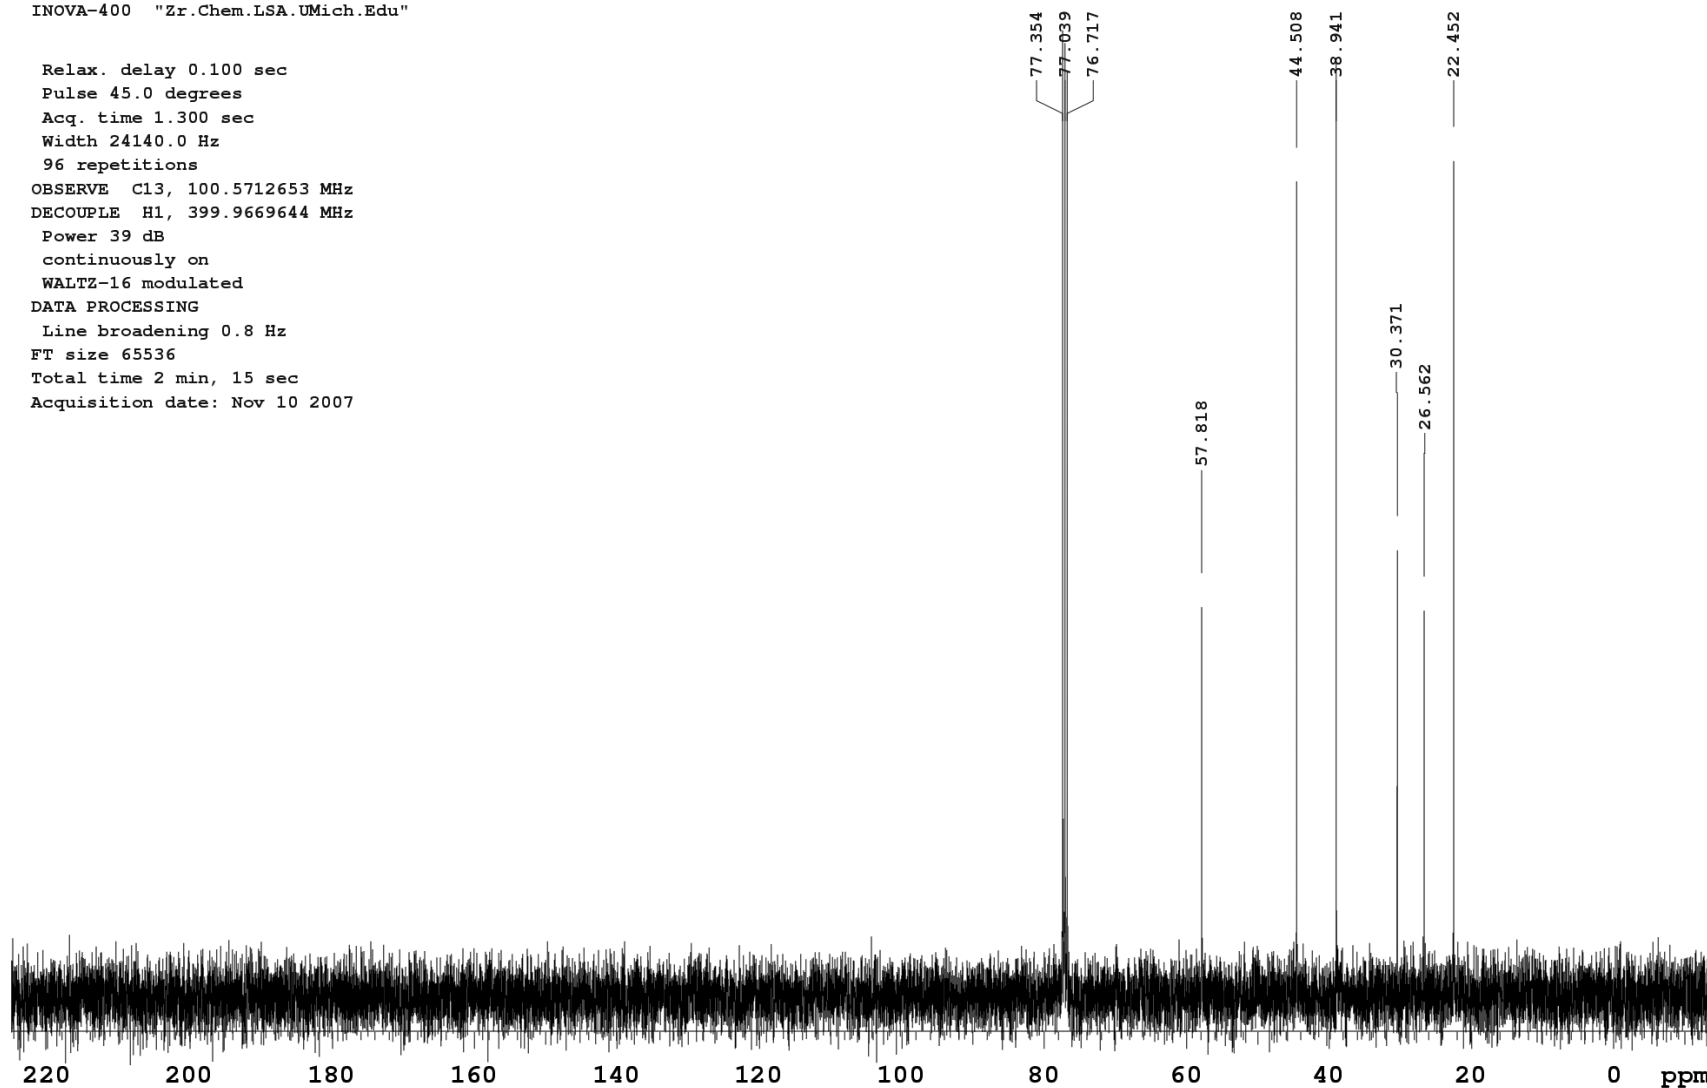

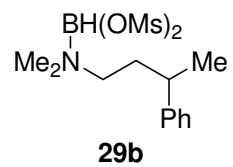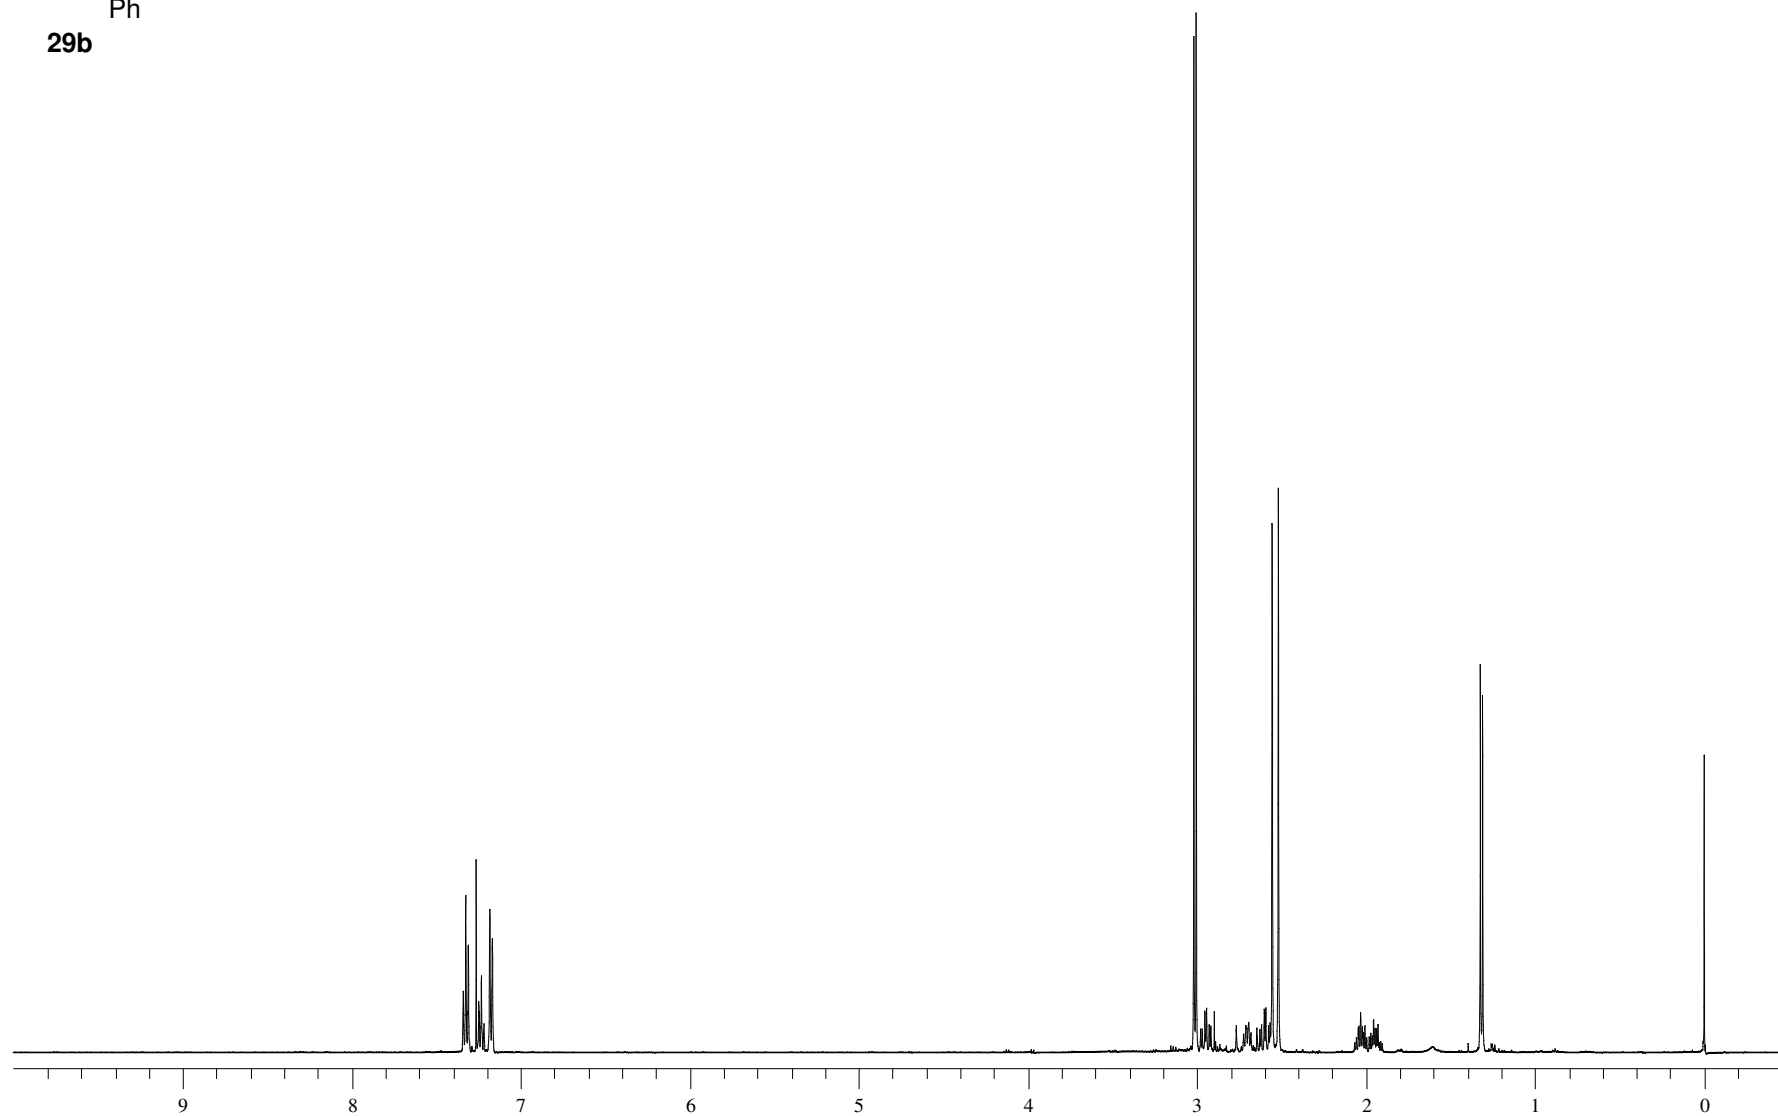



tdvVI-188-12-C

File: tdvVI-188-12-C

Pulse Sequence: s2pul

Solvent: cdcl3

Ambient temperature

Operator: tdevries

File: tdvVI-188-12-C

INOVA-400 "Zr.Chem.LSA.UMich.Edu"

Relax. delay 0.100 sec  
Pulse 45.0 degrees  
Acq. time 1.300 sec  
Width 24140.0 Hz  
544 repetitions  
OBSERVE C13, 100.5712660 MHz  
DECOUPLE H1, 399.9669644 MHz  
Power 39 dB  
continuously on  
WALTZ-16 modulated  
DATA PROCESSING  
Line broadening 0.8 Hz  
FT size 65536  
Total time 12 min, 46 sec  
Acquisition date: Nov 10 2007

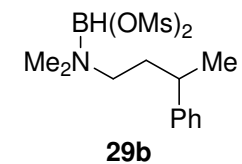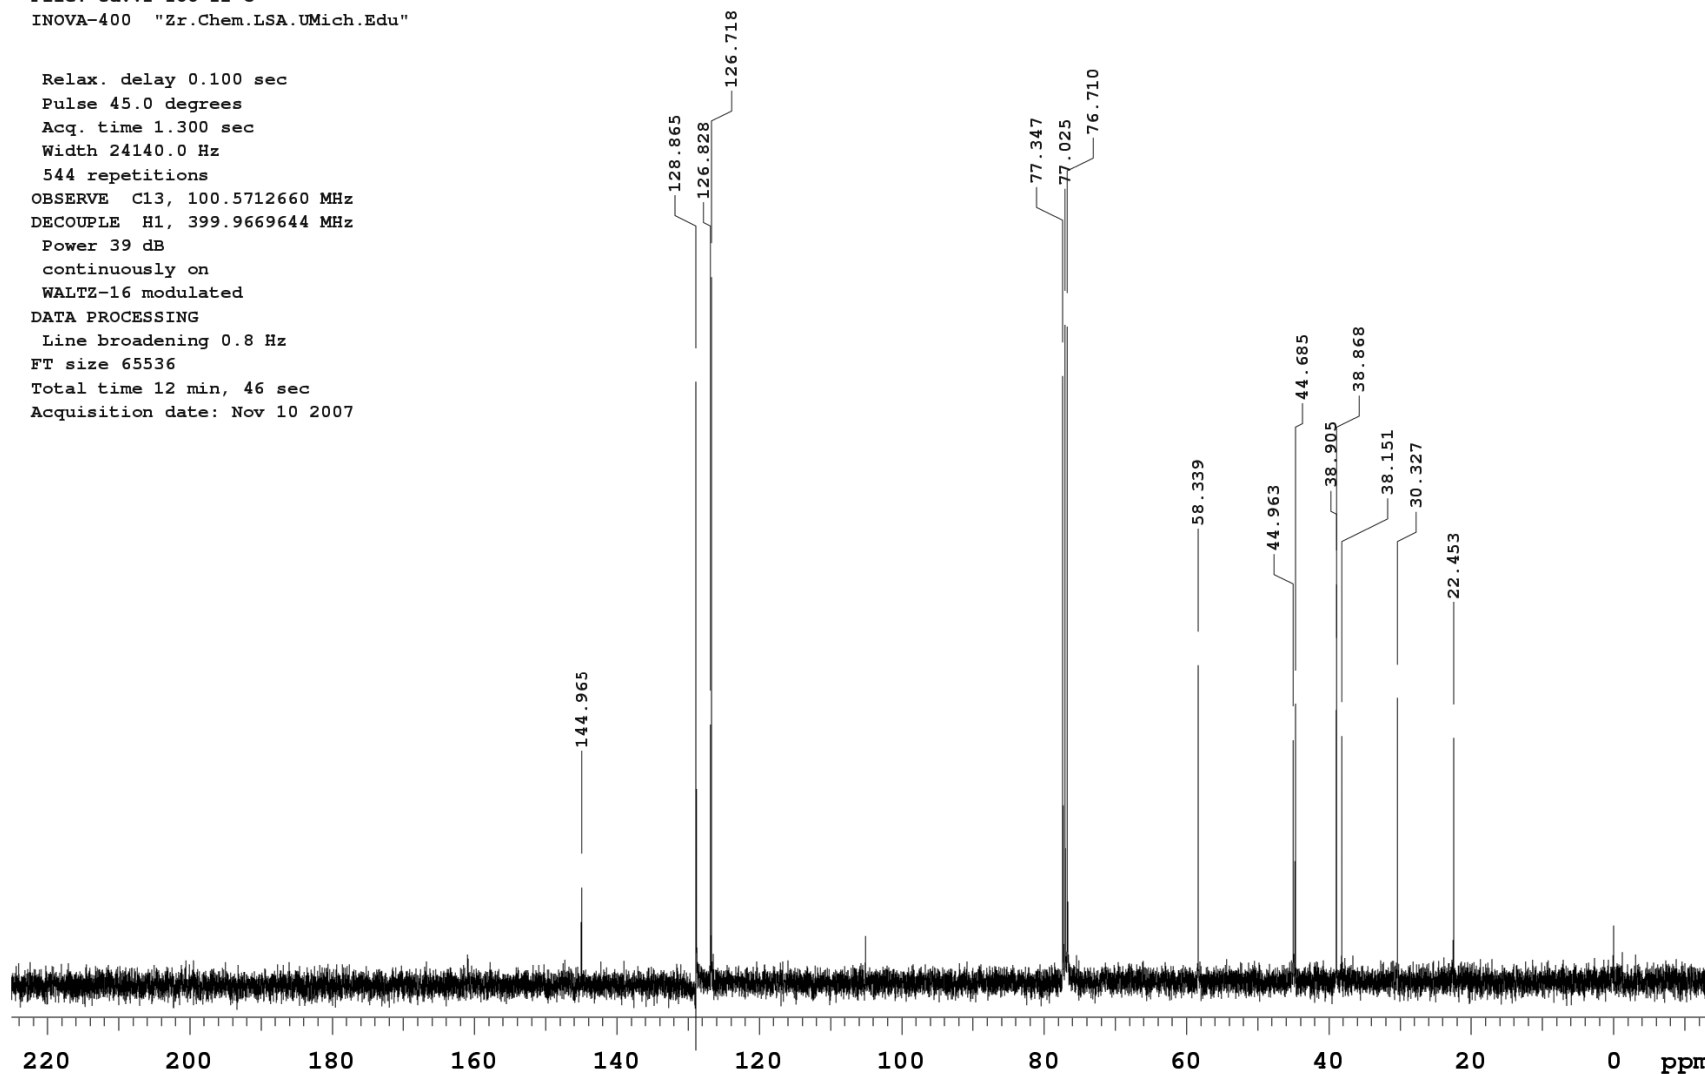

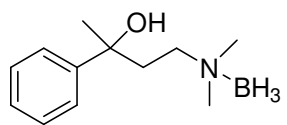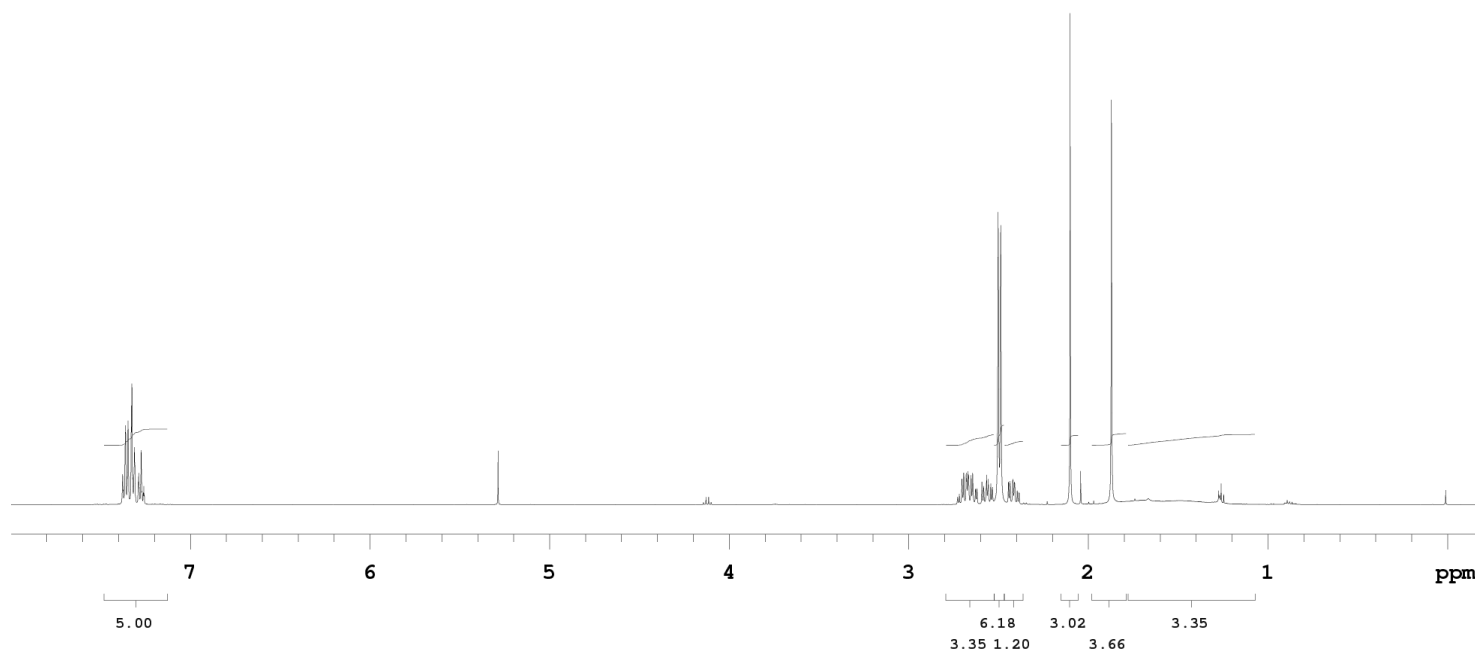

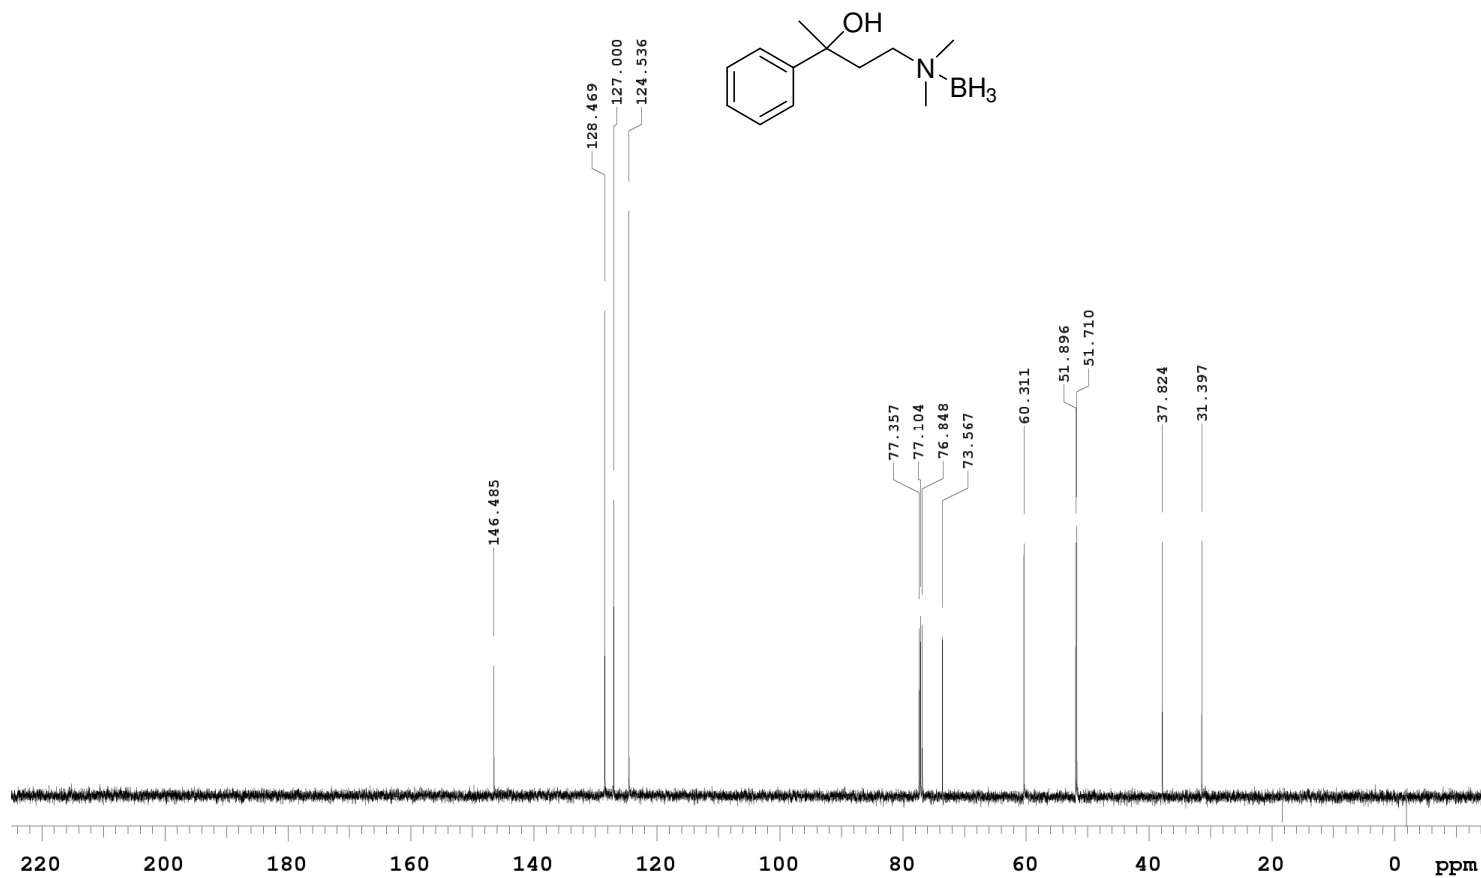

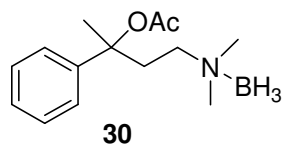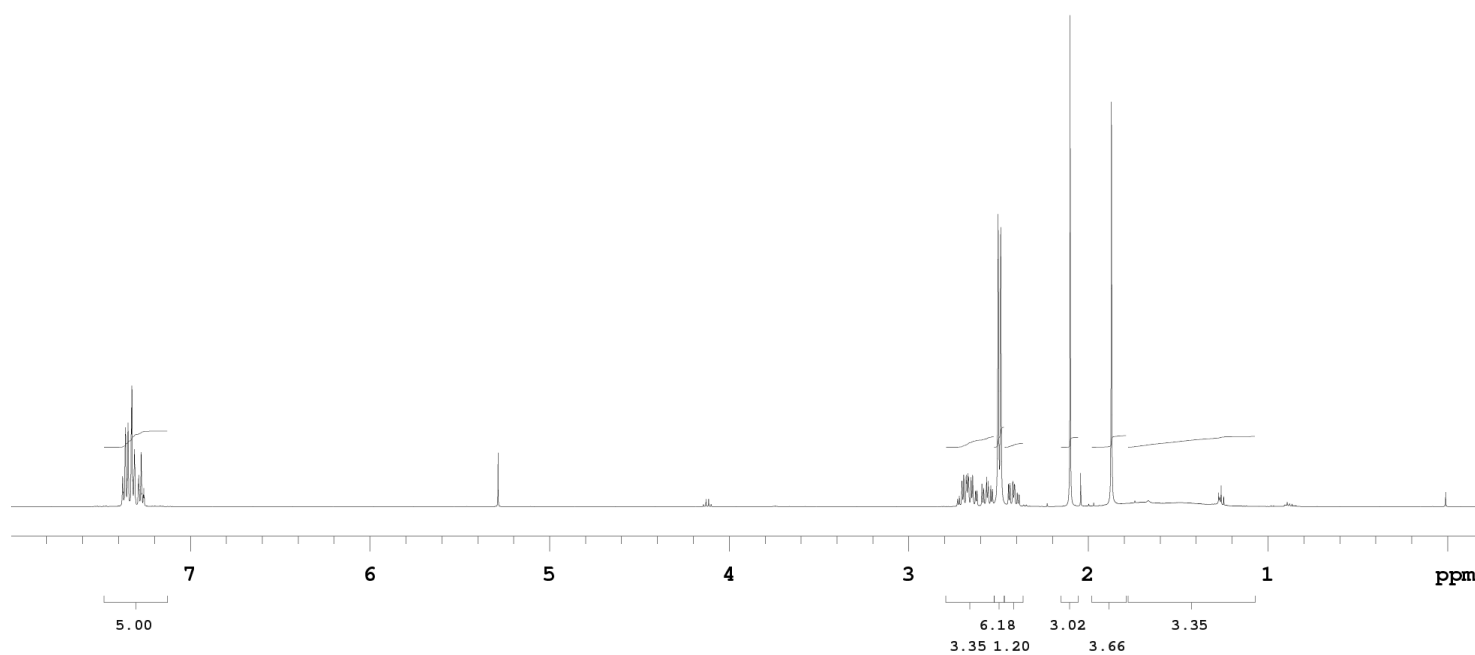

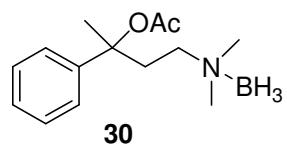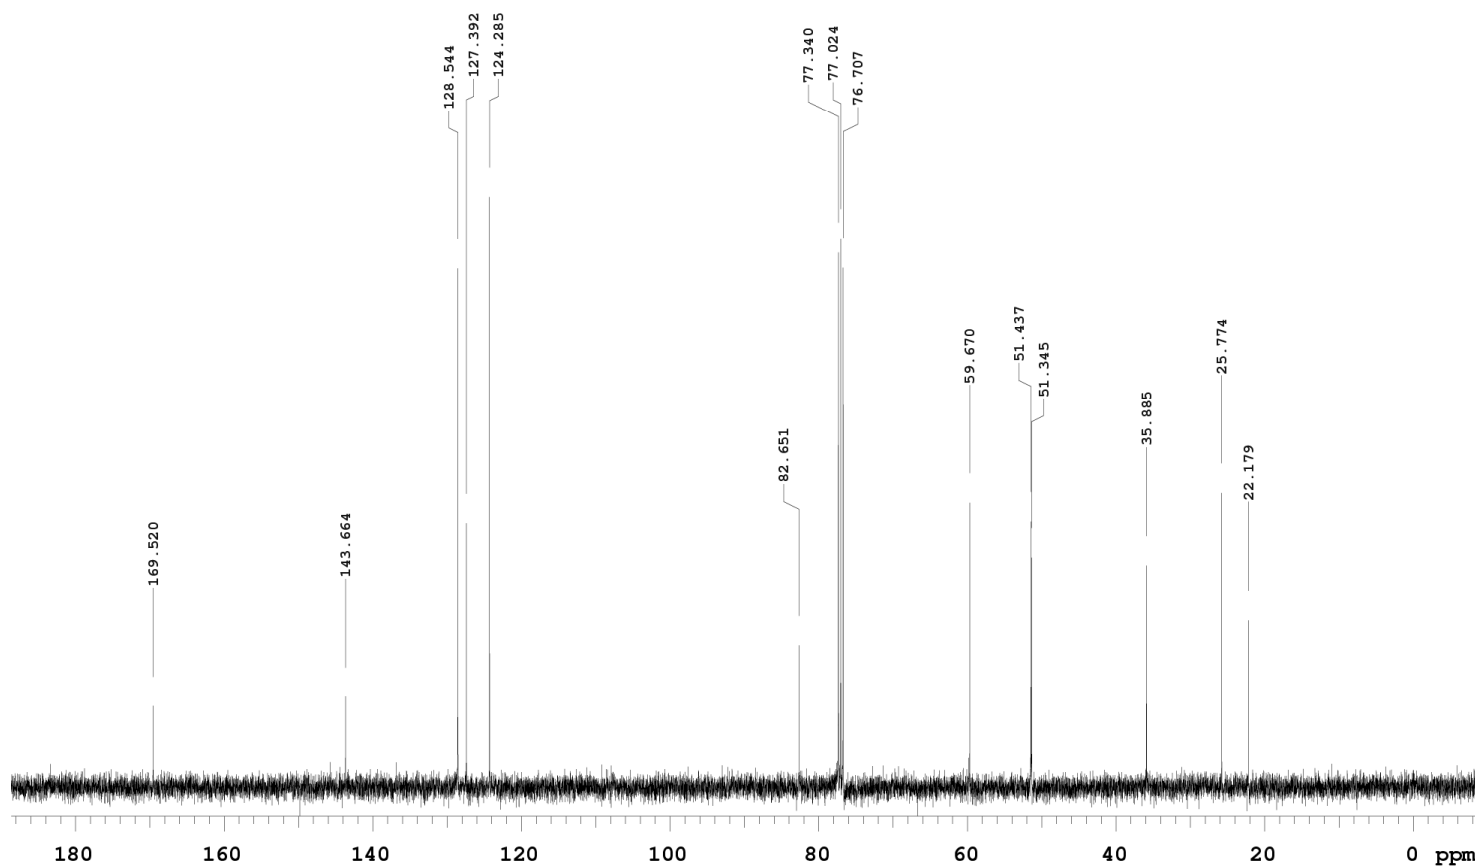

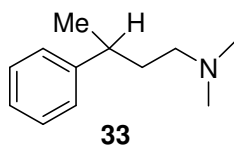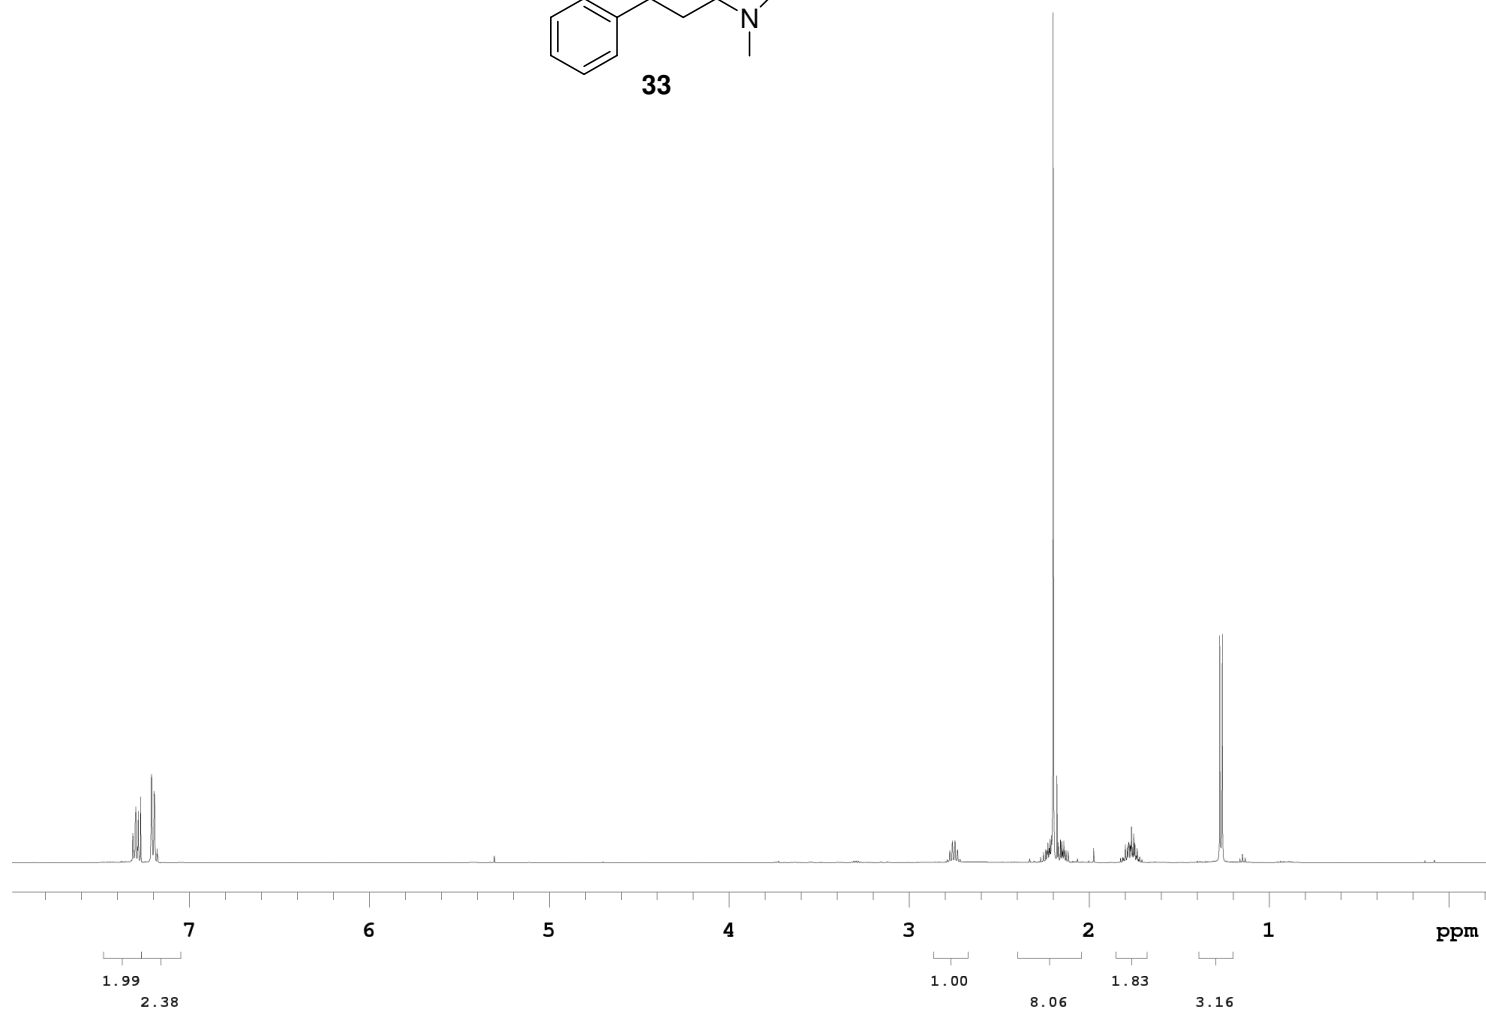

=

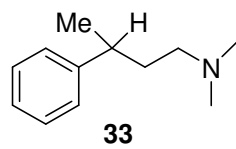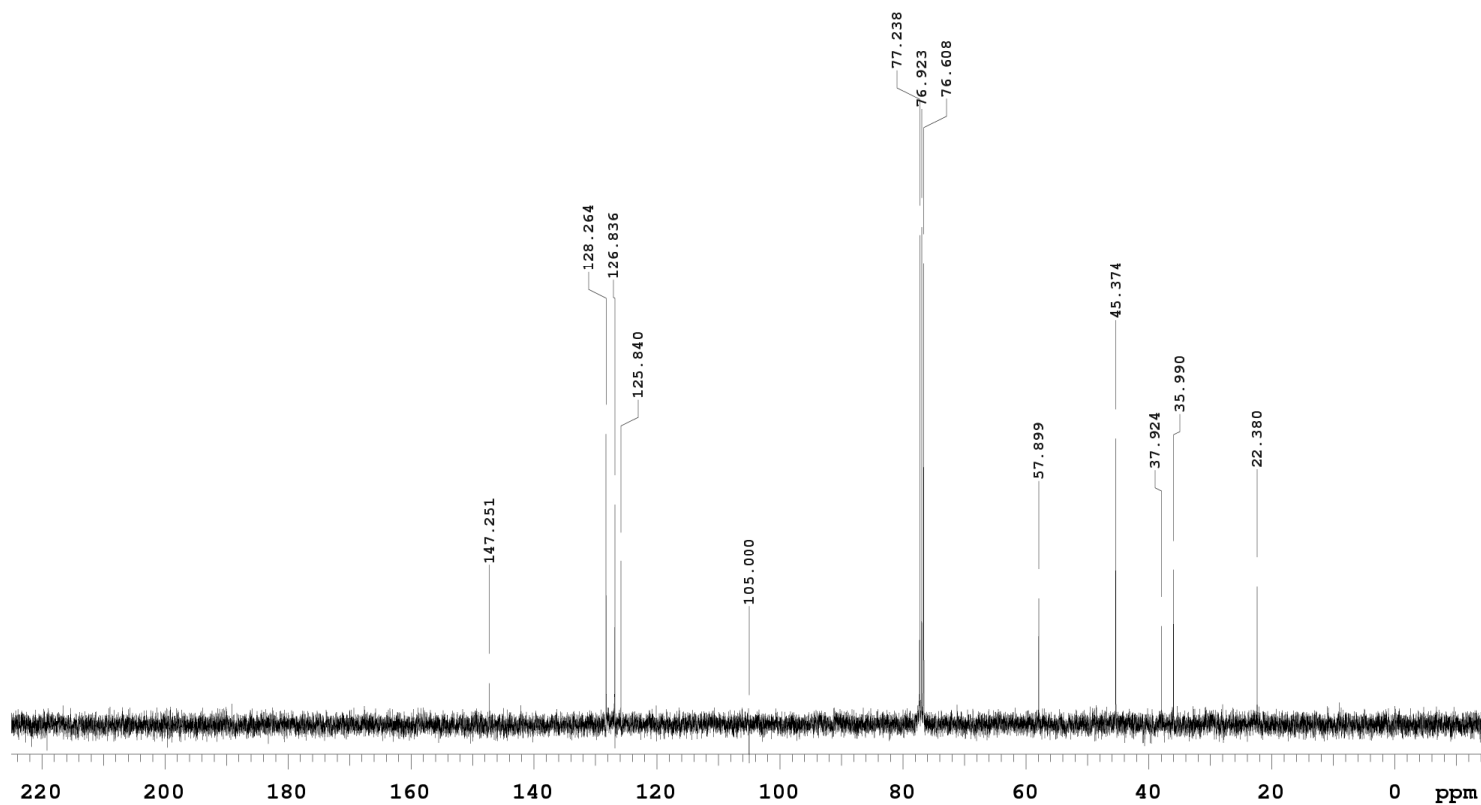

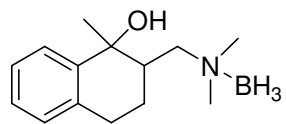

footnote 7

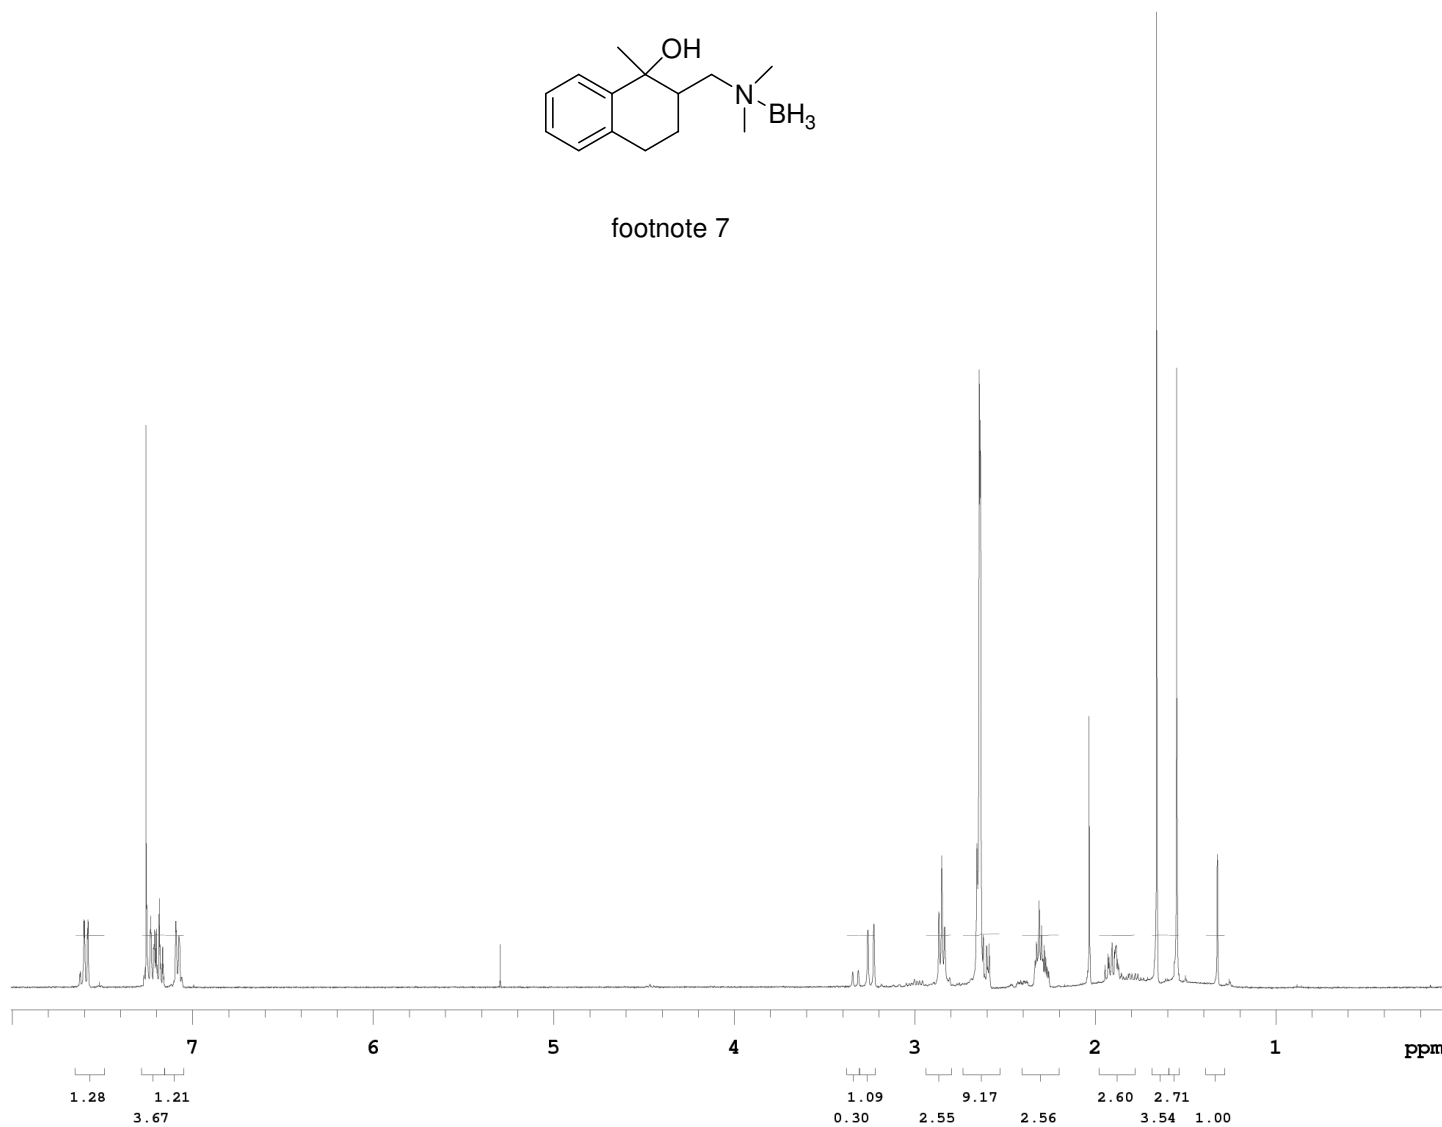



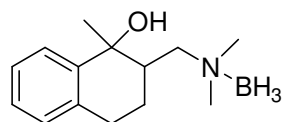

footnote 7

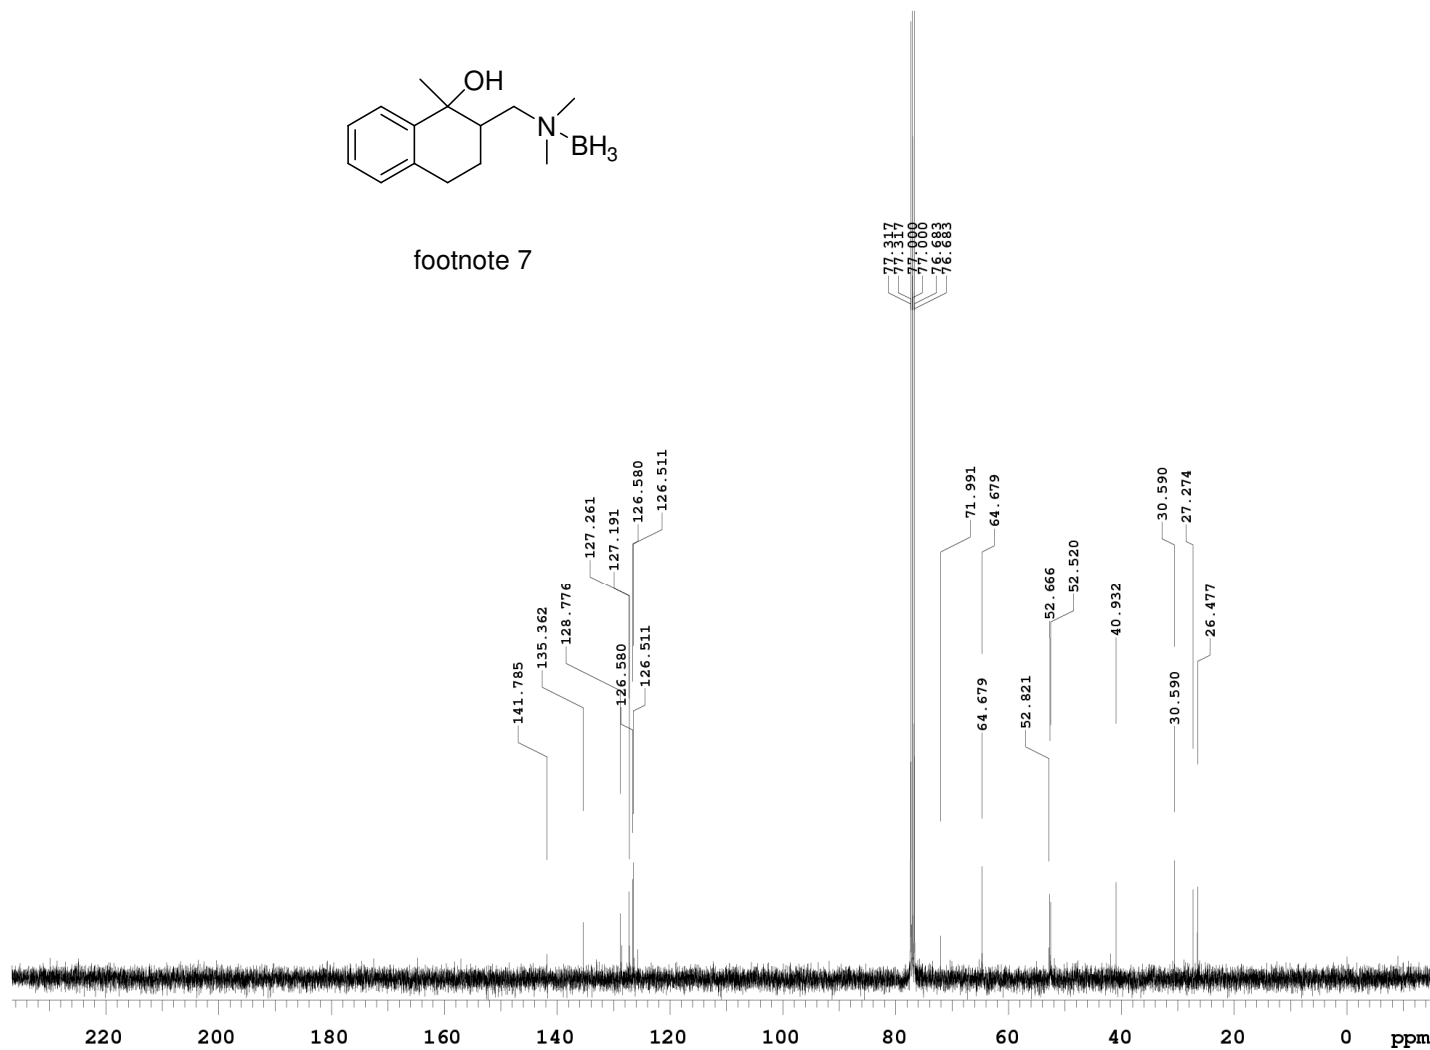

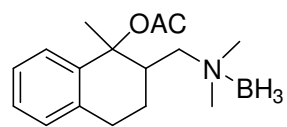

footnote 7, i

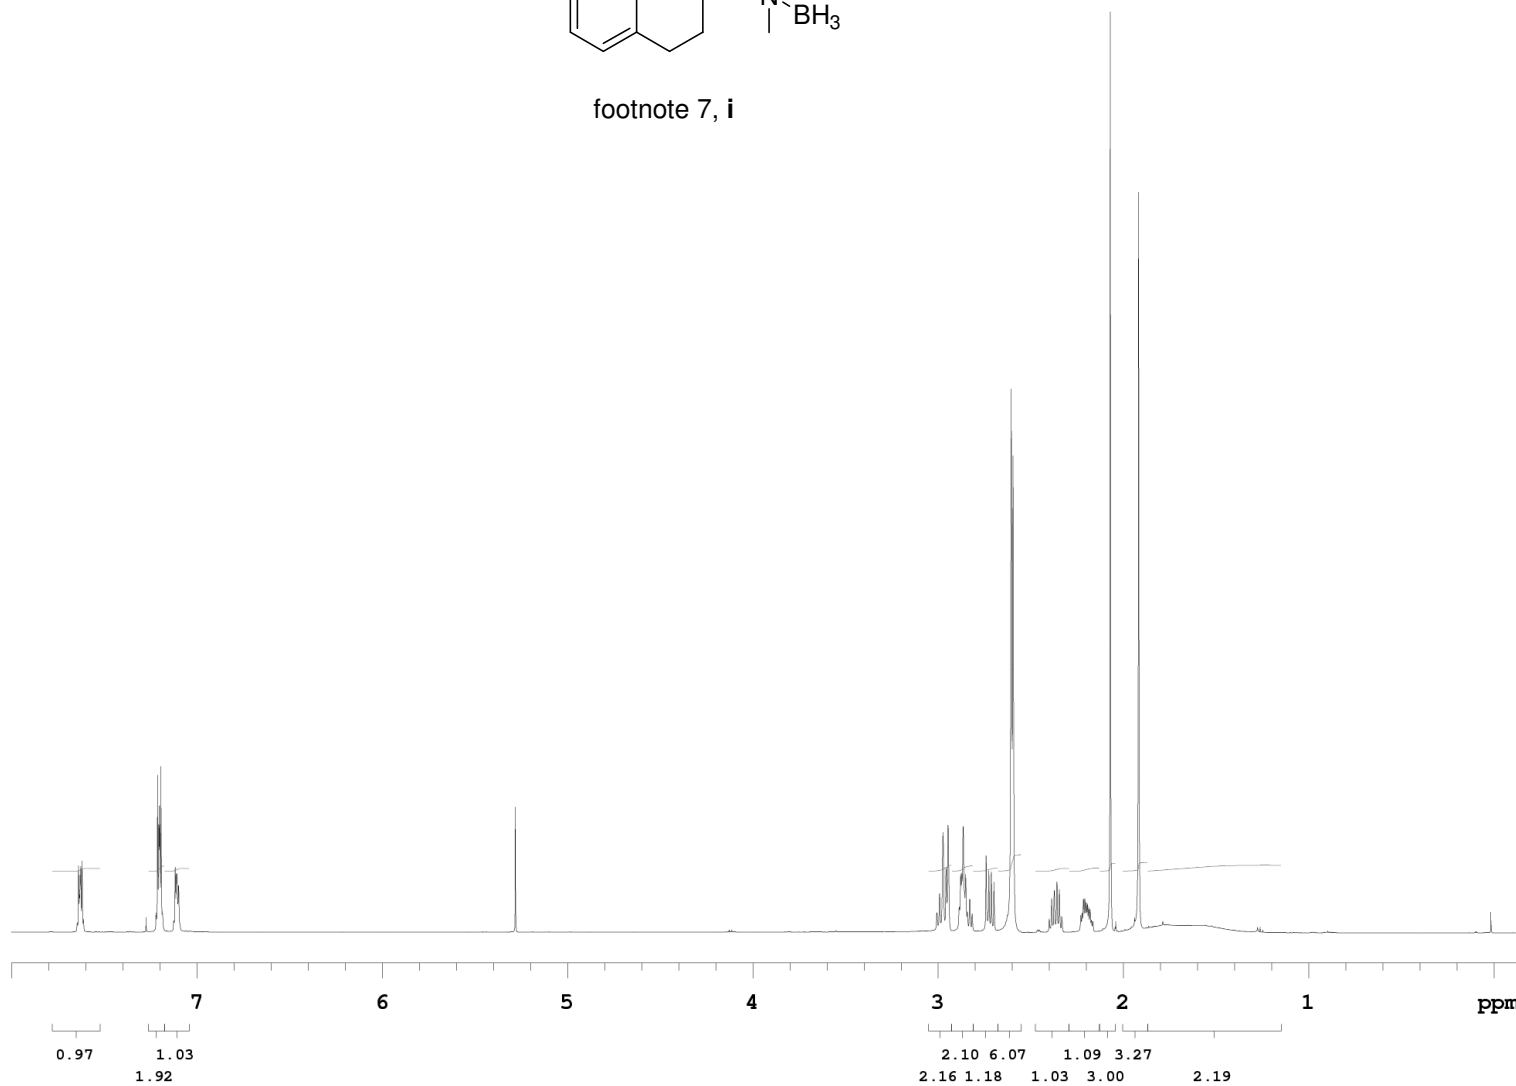

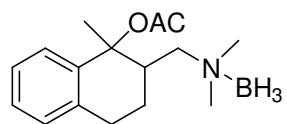

footnote 7, i

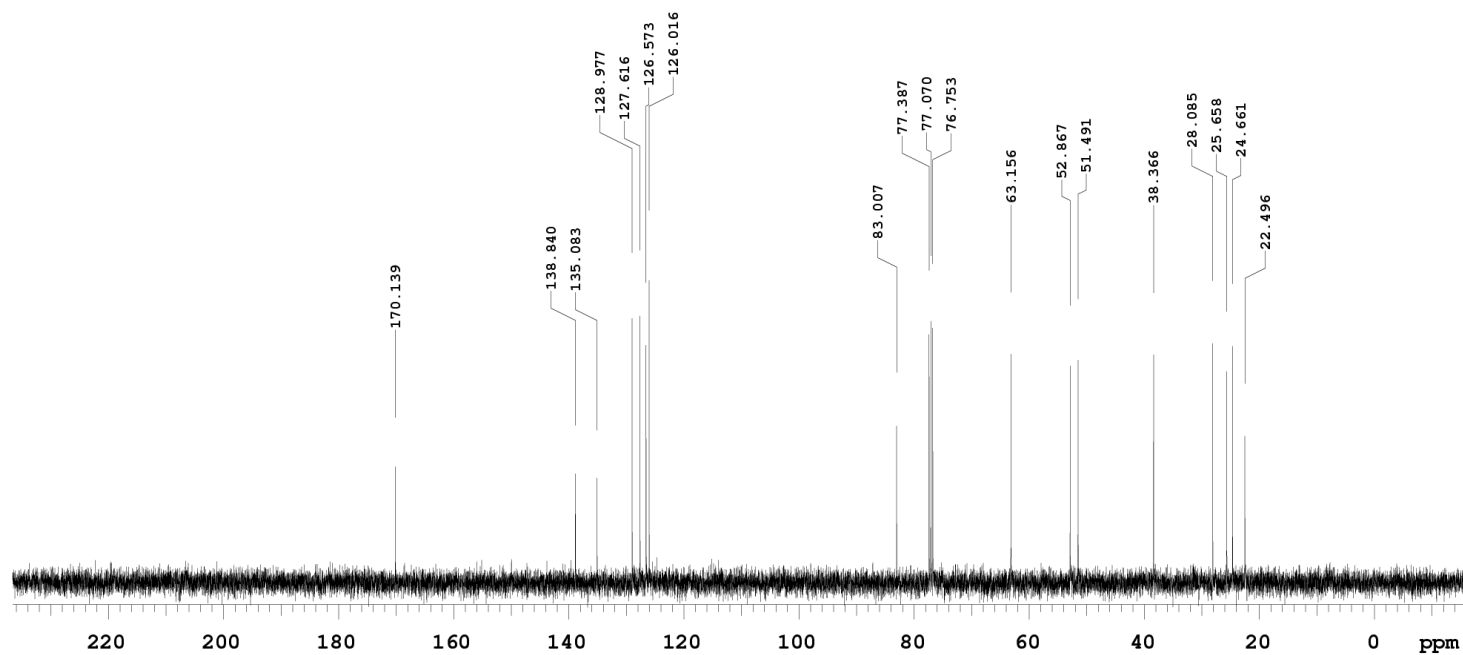

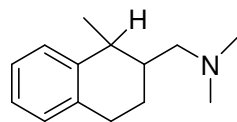

footnote 7, ii

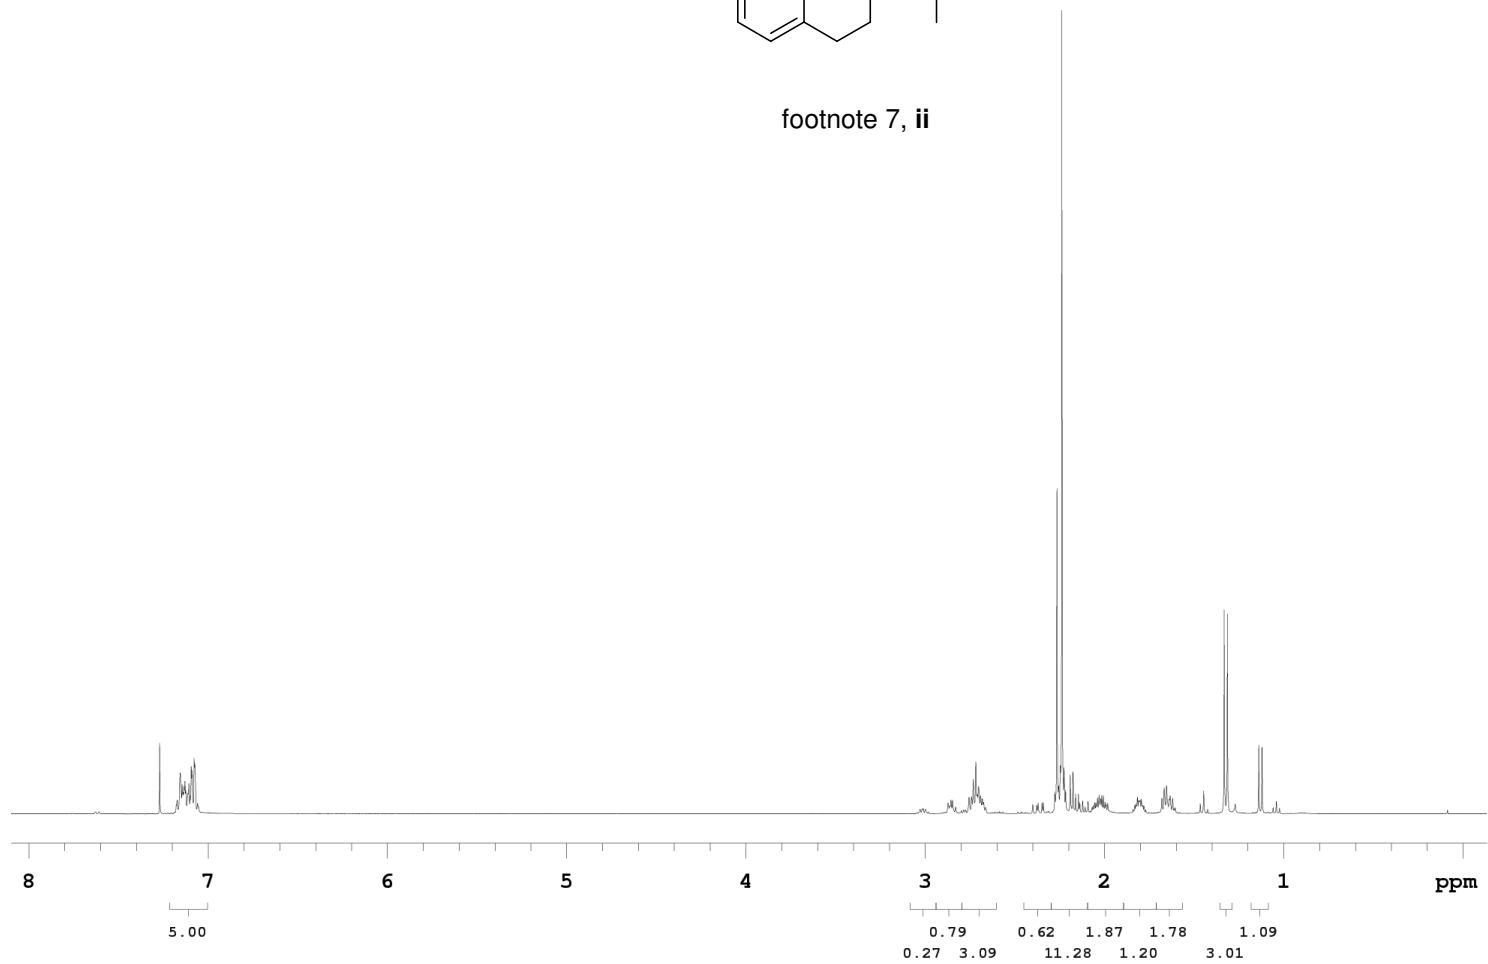

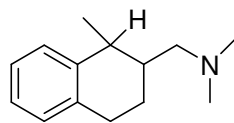

footnote 7, ii

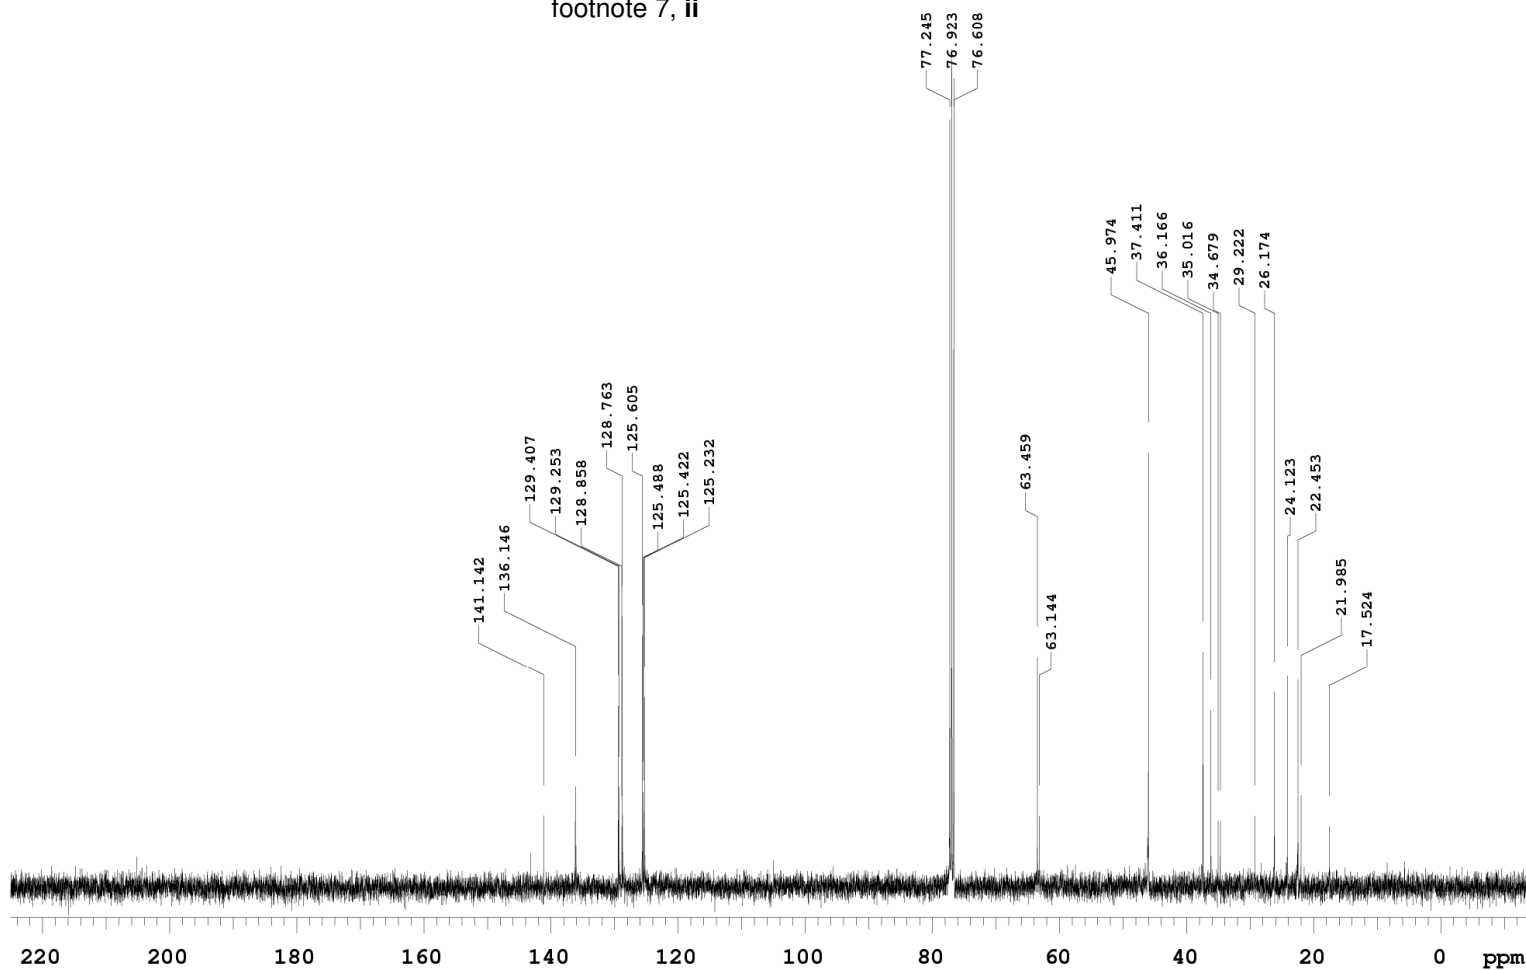

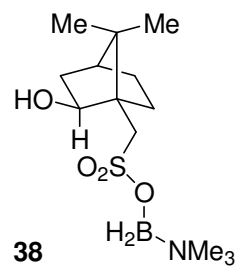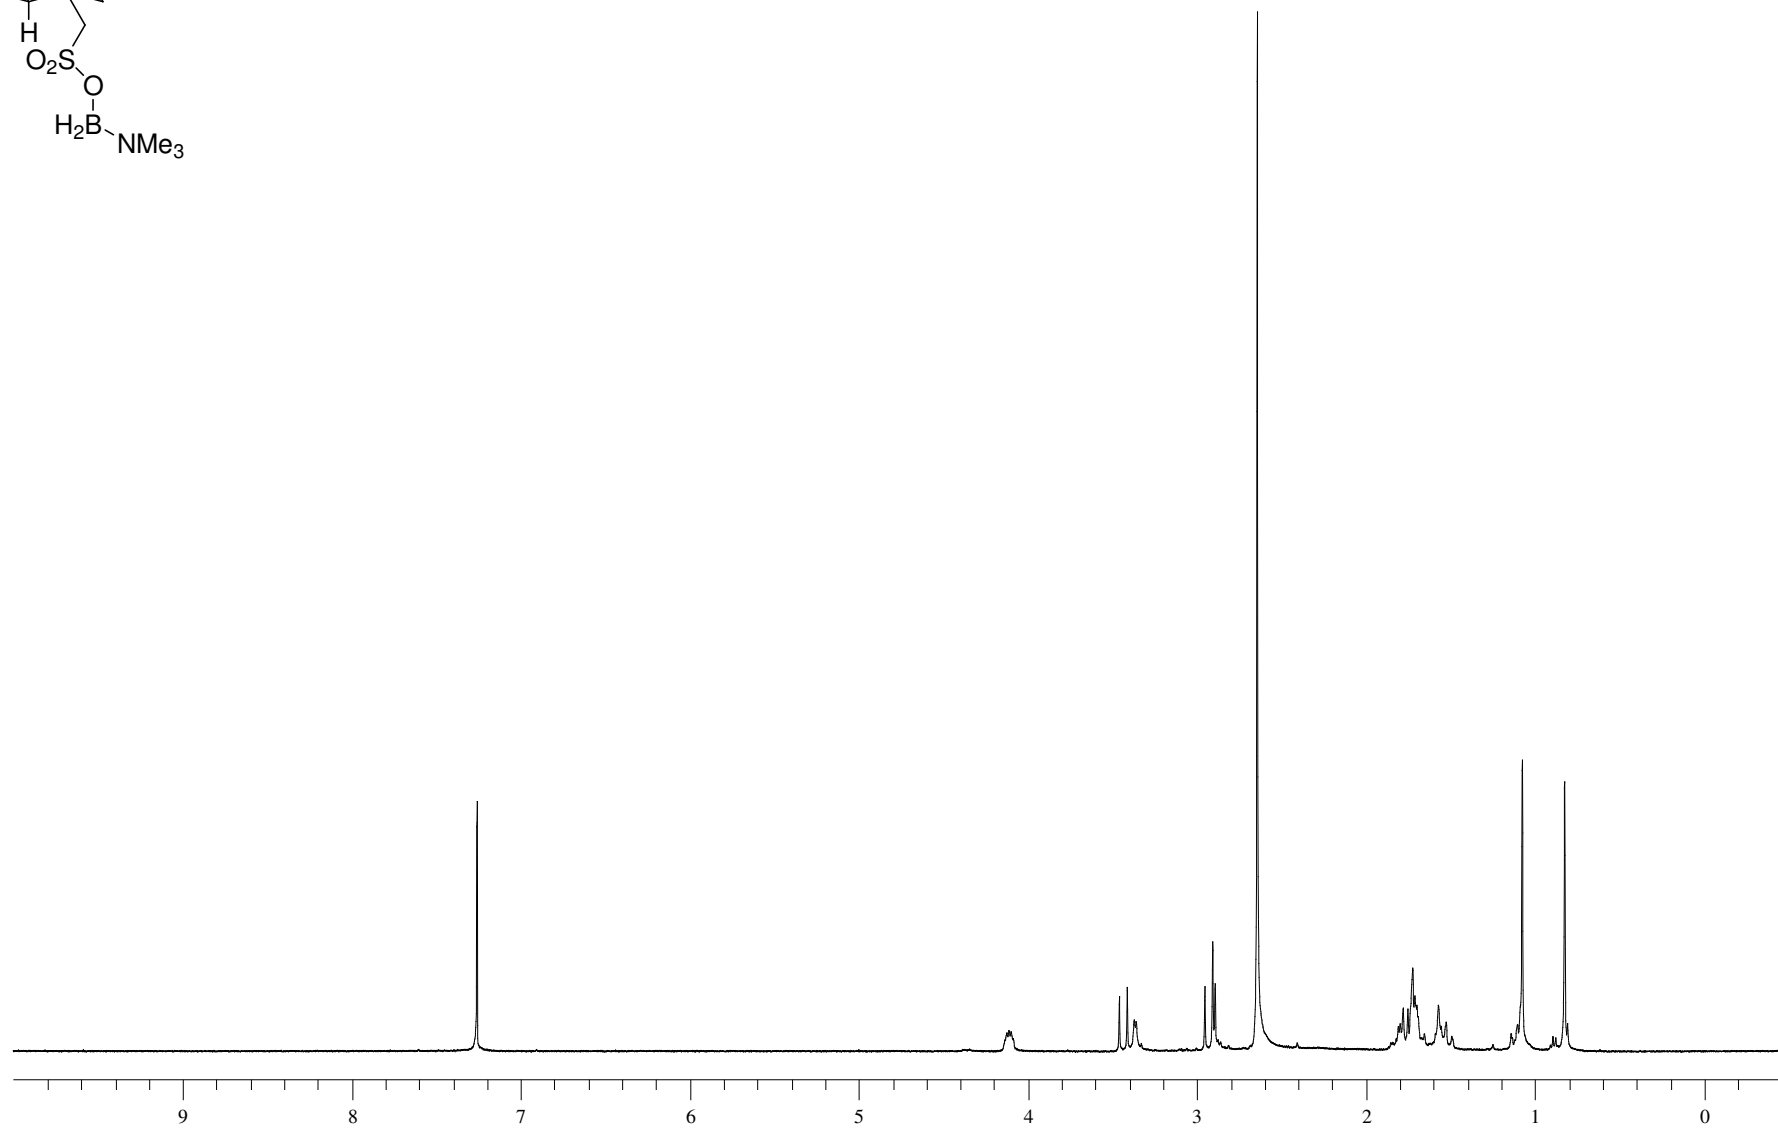

AMSI-095-C-char

File: Carbon

Pulse Sequence: s2pul

Solvent: cdcl3

Ambient temperature

Operator: tdevries

INOVA-400 "Zr.Chem.LSA.UMich.Edu"

Relax. delay 0.100 sec

Pulse 45.0 degrees

Acq. time 1.300 sec

Width 24140.0 Hz

2144 repetitions

OBSERVE C13, 100.5712660 MHz

DECOUPLE H1, 399.9669644 MHz

Power 39 dB

continuously on

WALTZ-16 modulated

DATA PROCESSING

Line broadening 0.8 Hz

FT size 65536

Total time 50 min, 21 sec

Acquisition date: Nov 14 2007

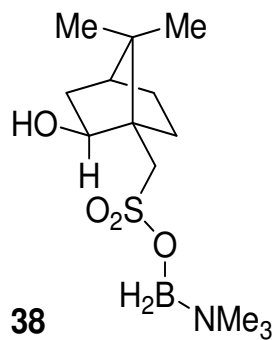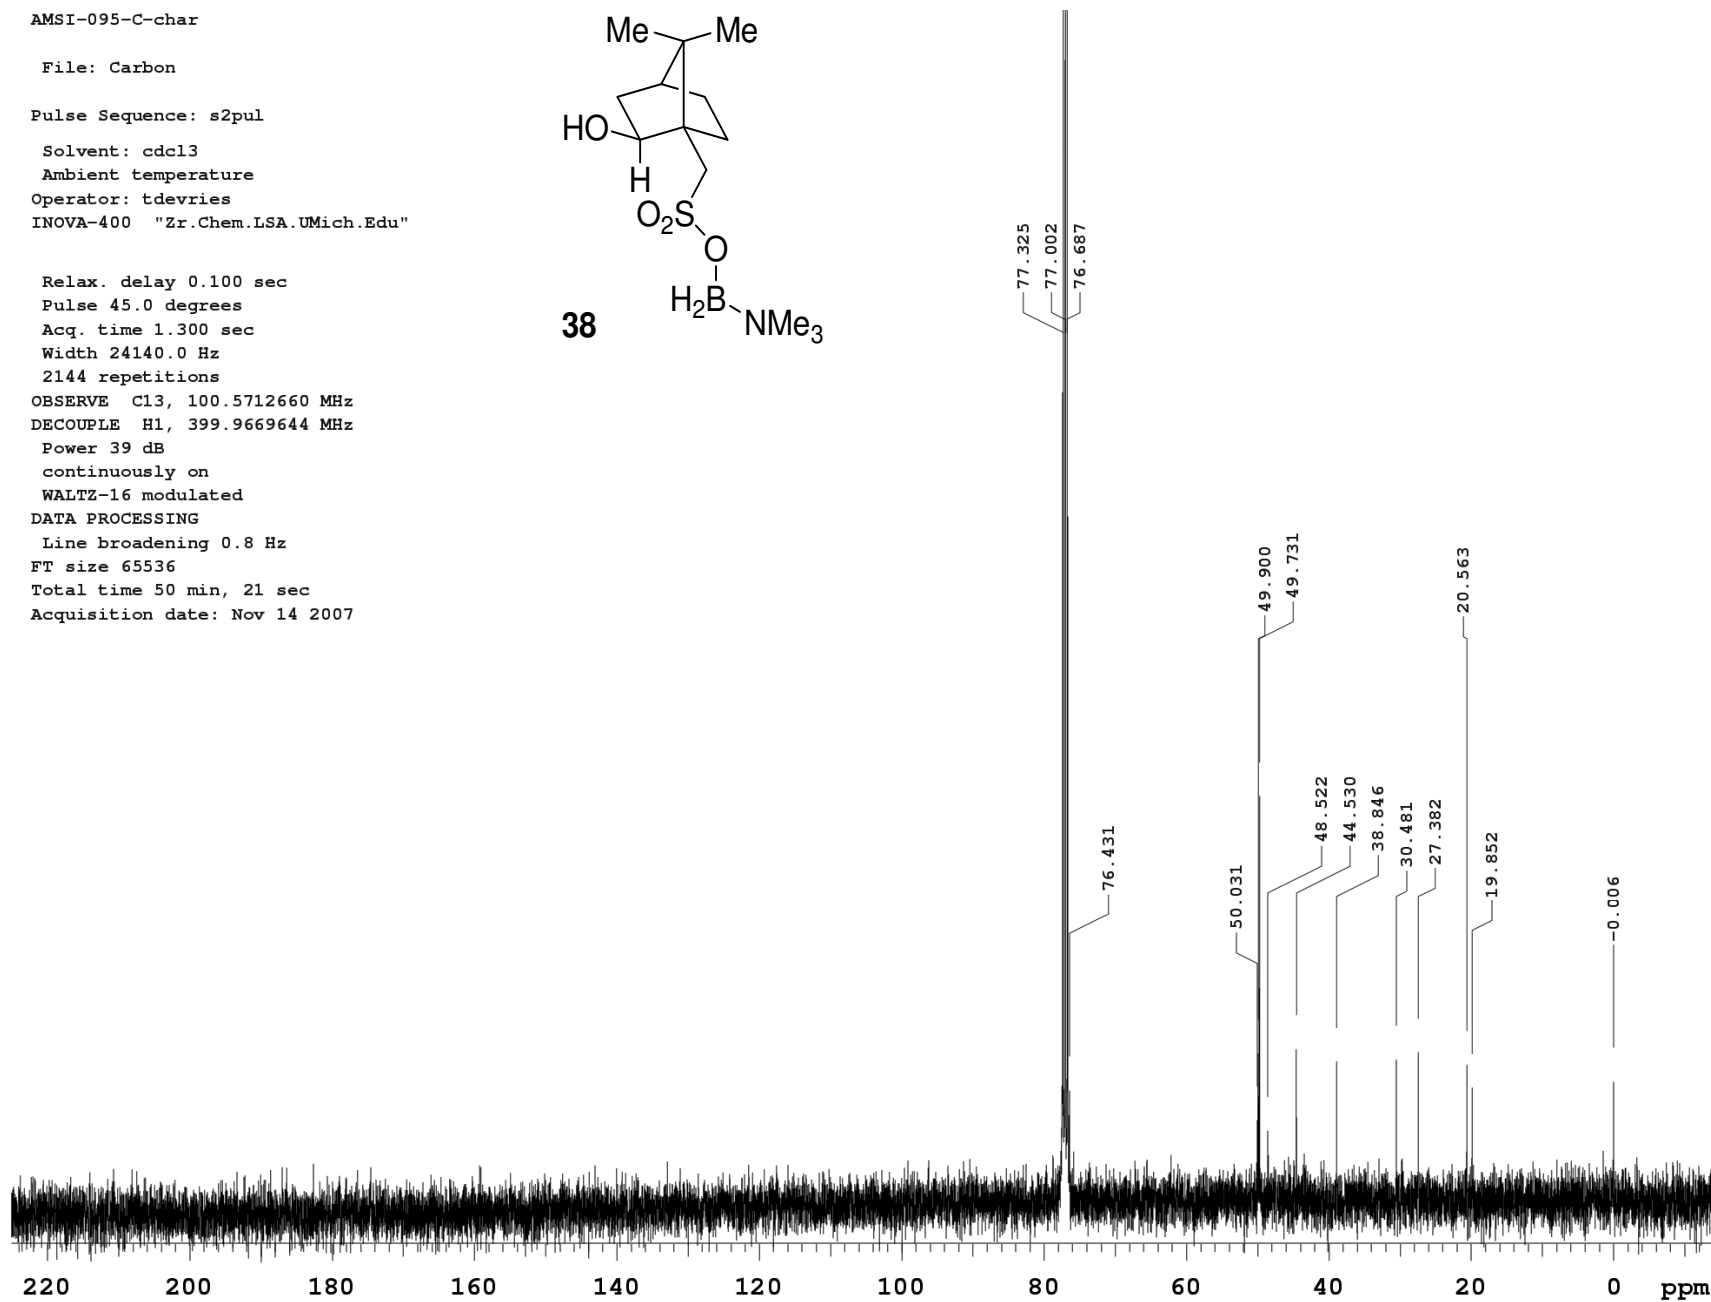

Supplement: Supplementary file 1 [file 4196695]
